# Supplementary material for: Concerted addition of aldehydes to the singlet biradical [P(μ-NTer)]2
Source: Royal Society of Chemistry journal article supplement (doi:10.1039/d2dt02229j), 2022-01-01
Supplement: d2dt02229j1.pdf [file d2dt02229j1.pdf]

## SUPPLEMENTARY INFORMATION

### Concerted addition of aldehydes to the singlet biradical $[P(\mu\text{-N}^{\text{Ter}})]_2$

*Jan Rosenboom, Alexander Villinger, Axel Schulz,\* and Jonas Bresien\**

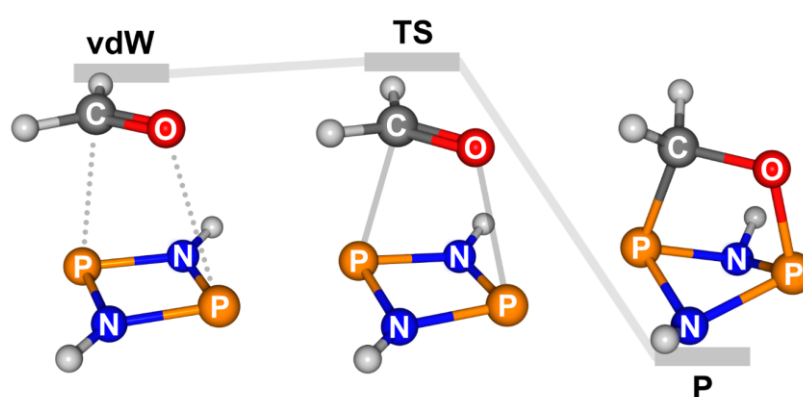

#### **This file includes:**

|   |                                       |     |
|---|---------------------------------------|-----|
| 1 | Experimental .....                    | S2  |
| 2 | Structure elucidation.....            | S4  |
| 3 | Syntheses of compounds.....           | S8  |
| 4 | Additional spectroscopic details..... | S29 |
| 5 | Computational details .....           | S30 |
| 6 | References.....                       | S67 |

# 1 Experimental

**General Information.** If not stated otherwise, all manipulations were carried out under oxygen- and moisture-free conditions under an inert atmosphere of argon using standard Schlenk or Drybox techniques. All glassware was heated three times *in vacuo* using a heat gun and cooled under argon atmosphere. Solvents were transferred using syringes, which were purged three times with argon prior to use. Solvents and reactants were either obtained from commercial sources or synthesized as detailed in Table S1.

**Table S1:** Origin and purification of solvents and reactants.

| Substance                                         | Origin                   | Purification                                                 |
|---------------------------------------------------|--------------------------|--------------------------------------------------------------|
| benzene, toluene                                  | local trade              | dried over Na/benzophenone<br>freshly distilled prior to use |
| THF                                               | local trade              | dried over Na/benzophenone<br>freshly distilled prior to use |
| PhCHO                                             | local trade              | dried over molecular sieve<br>freshly distilled prior to use |
| EtCHO                                             | local trade              | dried over molecular sieve<br>freshly distilled prior to use |
| C <sub>6</sub> H <sub>4</sub> NO <sub>2</sub> CHO | old stock                | sublimed                                                     |
| C <sub>6</sub> H <sub>4</sub> ClCHO               | old stock                | sublimed                                                     |
| C <sub>6</sub> D <sub>6</sub>                     | euriso-top               | dried over Na<br>freshly distilled prior to use              |
| C <sub>7</sub> D <sub>8</sub>                     | euriso-top               | dried over Na<br>freshly distilled prior to use              |
| [P( $\mu$ -NTer)] <sub>2</sub> ( <b>1</b> )       | synthesized <sup>1</sup> | used as synthesized                                          |
| KOtBu                                             | old stock                | sublimed                                                     |

**NMR spectra** were recorded on Bruker spectrometers AVANCE 250, AVANCE 300 or AVANCE 500 and were referenced internally to the deuterated solvent ( $C_6D_6$   $\delta_{ref.} = 128.06$  ppm,  $\delta_{ref.,2} = 67.21$  ppm, toluene- $d_8$   $\delta_{ref.,1} = 20.40$  ppm,  $\delta_{ref.,2} = 125.49$  ppm), to protic impurities in the deuterated solvent ( $^1H$ :  $C_6HD_5$   $\delta_{ref.} = 7.16$  ppm,  $\delta_{ref.,2} = 3.58$  ppm, toluene- $d_7$   $\delta_{ref.,1} = 2.09$  ppm,  $\delta_{ref.,2} = 6.98$  ppm)<sup>2</sup> or externally ( $^{31}P$ : 85%  $H_3PO_4$   $\delta_{ref.} = 0$  ppm). All measurements were carried out at ambient temperature unless denoted otherwise. NMR signals were assigned using experimental data (e.g. chemical shifts, coupling constants, integrals where applicable).

**IR spectra** of crystalline samples were recorded on a Bruker Alpha II FT-IR spectrometer equipped with an ATR unit at ambient temperature under argon atmosphere. Relative intensities are reported according to the following intervals: very weak (vw, 0–10%), weak (w, 10–30%), medium (m, 30–60%), strong (s, 60–90%), very strong (vs, 90–100%).

**Raman spectra** of crystalline samples were recorded using a LabRAM HR 800 Horiba Jobin YVON Raman spectrometer equipped with an Olympus BX41 microscope with variable lenses. The samples were excited by a red laser (633 nm, 17 mW, air-cooled HeNe laser). All measurements were carried out at ambient temperature unless stated otherwise.

**Elemental analyses** were obtained using an Elementar vario Micro cube CHNS analyser.

**Melting points** (uncorrected) were determined using a Stanford Research Systems EZ Melt at a heating rate of 20 °C/min. Clearing points are reported.

**Mass spectra** were recorded on a Thermo Electron MAT 95-XP sector field mass spectrometer using crystalline samples.

## 2 Structure elucidation

**X-ray Structure Determination:** X-ray quality crystals were selected in Fomblin YR-1800 perfluoroether (Alfa Aesar) at ambient temperature. The samples were cooled to 123(2) K during measurement. The data were collected on a Bruker D8 Quest diffractometer or a Bruker Kappa Apex II diffractometer using Mo  $K_{\alpha}$  radiation ( $\lambda = 0.71073 \text{ \AA}$ ). The structures were solved by iterative methods (SHELXT)<sup>3</sup> and refined by full matrix least squares procedures (SHELXL).<sup>4</sup> Semi-empirical absorption corrections were applied (SADABS).<sup>5</sup> All non-hydrogen atoms were refined anisotropically, hydrogen atoms were included in the refinement at calculated positions using a riding model.

**Table S2:** Crystallographic details of **2** · 0.5 C<sub>6</sub>H<sub>6</sub>, **3** · 0.5 C<sub>7</sub>H<sub>8</sub>, **4**.

| Compound                                                                                          | <b>2</b> · 0.5 C <sub>6</sub> H <sub>6</sub>                                                       | <b>3</b> · 0.5 C <sub>7</sub> H <sub>8</sub>                                                                       | <b>4</b>                                                         |
|---------------------------------------------------------------------------------------------------|----------------------------------------------------------------------------------------------------|--------------------------------------------------------------------------------------------------------------------|------------------------------------------------------------------|
| Chem. Formula                                                                                     | C <sub>55</sub> H <sub>56</sub> N <sub>2</sub> OP <sub>2</sub> · 0.5 C <sub>6</sub> H <sub>6</sub> | C <sub>55</sub> H <sub>55</sub> N <sub>3</sub> O <sub>3</sub> P <sub>2</sub> · 0.5(C <sub>7</sub> H <sub>8</sub> ) | C <sub>55</sub> H <sub>55</sub> ClN <sub>2</sub> OP <sub>2</sub> |
| Formula weight [g/mol]                                                                            | 862.01                                                                                             | 914.02                                                                                                             | 857.40                                                           |
| Colour                                                                                            | colourless                                                                                         | yellow                                                                                                             | colourless                                                       |
| Crystal system                                                                                    | monoclinic                                                                                         | triclinic                                                                                                          | monoclinic                                                       |
| Space group                                                                                       | <i>P</i> 2 <sub>1</sub> / <i>c</i>                                                                 | <i>P</i> $\bar{1}$                                                                                                 | <i>P</i> 2 <sub>1</sub> / <i>n</i>                               |
| <i>a</i> [Å]                                                                                      | 11.8530(5)                                                                                         | 12.0792(9)                                                                                                         | 12.060(3)                                                        |
| <i>b</i> [Å]                                                                                      | 24.4713(9)                                                                                         | 16.788(1)                                                                                                          | 24.498(6)                                                        |
| <i>c</i> [Å]                                                                                      | 16.8584(6)                                                                                         | 27.116(2)                                                                                                          | 16.669(4)                                                        |
| $\alpha$ [°]                                                                                      | 90                                                                                                 | 73.506(2)                                                                                                          | 90                                                               |
| $\beta$ [°]                                                                                       | 108.606(2)                                                                                         | 78.572(2)                                                                                                          | 110.821(5)                                                       |
| $\gamma$ [°]                                                                                      | 90                                                                                                 | 70.114(2)                                                                                                          | 90                                                               |
| <i>V</i> [Å <sup>3</sup> ]                                                                        | 4634.3(3)                                                                                          | 4926.5(6)                                                                                                          | 4603(2)                                                          |
| <i>Z</i>                                                                                          | 4                                                                                                  | 4                                                                                                                  | 4                                                                |
| $\rho_{\text{calcd.}}$ [g/cm <sup>3</sup> ]                                                       | 1.235                                                                                              | 1.232                                                                                                              | 1.237                                                            |
| $\mu$ [mm <sup>-1</sup> ]                                                                         | 0.138                                                                                              | 0.137                                                                                                              | 0.194                                                            |
| <i>T</i> [K]                                                                                      | 123(2)                                                                                             | 123(2)                                                                                                             | 123(2)                                                           |
| Measured reflections                                                                              | 106140                                                                                             | 163409                                                                                                             | 91246                                                            |
| Independent reflections                                                                           | 14743                                                                                              | 17319                                                                                                              | 13415                                                            |
| Reflections with <i>I</i> > 2 $\sigma$ ( <i>I</i> )                                               | 10397                                                                                              | 13871                                                                                                              | 9680                                                             |
| <i>R</i> <sub>int</sub>                                                                           | 0.0895                                                                                             | 0.0705                                                                                                             | 0.0734                                                           |
| <i>F</i> (000)                                                                                    | 1836                                                                                               | 1940                                                                                                               | 1816                                                             |
| <i>R</i> <sub>1</sub> ( <i>R</i> [ <i>F</i> <sup>2</sup> > 2 $\sigma$ ( <i>F</i> <sup>2</sup> )]) | 0.0489                                                                                             | 0.0714                                                                                                             | 0.0487                                                           |
| <i>wR</i> <sub>2</sub> ( <i>F</i> <sup>2</sup> )                                                  | 0.1299                                                                                             | 0.1788                                                                                                             | 0.1269                                                           |
| GooF                                                                                              | 1.014                                                                                              | 1.115                                                                                                              | 1.016                                                            |
| No. of Parameters                                                                                 | 599                                                                                                | 1160                                                                                                               | 562                                                              |
| CCDC #                                                                                            | 2125924                                                                                            | 2125926                                                                                                            | 2125927                                                          |

**Table S3:** Crystallographic details of **5**, **6**.

| Compound                                                                                          | <b>5</b>                                                       | <b>6</b>                                                                      |
|---------------------------------------------------------------------------------------------------|----------------------------------------------------------------|-------------------------------------------------------------------------------|
| Chem. Formula                                                                                     | C <sub>51</sub> H <sub>56</sub> N <sub>2</sub> OP <sub>2</sub> | C <sub>59</sub> H <sub>65</sub> KN <sub>2</sub> O <sub>2</sub> P <sub>2</sub> |
| Formula weight [g/mol]                                                                            | 774.91                                                         | 935.17                                                                        |
| Colour                                                                                            | colourless                                                     | colourless                                                                    |
| Crystal system                                                                                    | monoclinic                                                     | monoclinic                                                                    |
| Space group                                                                                       | <i>P</i> 2 <sub>1</sub> / <i>c</i>                             | <i>P</i> 2 <sub>1</sub> / <i>c</i>                                            |
| <i>a</i> [Å]                                                                                      | 11.909(5)                                                      | 16.750(2)                                                                     |
| <i>b</i> [Å]                                                                                      | 21.941(9)                                                      | 17.111(2)                                                                     |
| <i>c</i> [Å]                                                                                      | 16.937(7)                                                      | 17.953(2)                                                                     |
| $\alpha$ [°]                                                                                      | 90                                                             | 90                                                                            |
| $\beta$ [°]                                                                                       | 108.673(9)                                                     | 94.172(2)                                                                     |
| $\gamma$ [°]                                                                                      | 90                                                             | 90                                                                            |
| <i>V</i> [Å <sup>3</sup> ]                                                                        | 4193(3)                                                        | 5131.7(9)                                                                     |
| <i>Z</i>                                                                                          | 4                                                              | 4                                                                             |
| $\rho_{\text{calcd.}}$ [g/cm <sup>3</sup> ]                                                       | 1.228                                                          | 1.210                                                                         |
| $\mu$ [mm <sup>-1</sup> ]                                                                         | 0.144                                                          | 0.210                                                                         |
| <i>T</i> [K]                                                                                      | 123(2)                                                         | 123(2)                                                                        |
| Measured reflections                                                                              | 97316                                                          | 106650                                                                        |
| Independent reflections                                                                           | 13359                                                          | 18574                                                                         |
| Reflections with <i>I</i> > 2 $\sigma$ ( <i>I</i> )                                               | 10208                                                          | 13393                                                                         |
| <i>R</i> <sub>int</sub>                                                                           | 0.0581                                                         | 0.0699                                                                        |
| <i>F</i> (000)                                                                                    | 1656                                                           | 1992                                                                          |
| <i>R</i> <sub>1</sub> ( <i>R</i> [ <i>F</i> <sup>2</sup> > 2 $\sigma$ ( <i>F</i> <sup>2</sup> )]) | 0.0464                                                         | 0.0498                                                                        |
| <i>wR</i> <sub>2</sub> ( <i>F</i> <sup>2</sup> )                                                  | 0.1272                                                         | 0.1290                                                                        |
| GooF                                                                                              | 1.047                                                          | 1.032                                                                         |
| No. of Parameters                                                                                 | 518                                                            | 610                                                                           |
| CCDC #                                                                                            | 2125925                                                        | 2125928                                                                       |

**Table S4:** Selected bond lengths [Å], angles and dihedral angles [°] in the solid state.

|         | <b>2</b>           | <b>3</b>          | <b>4</b>           | <b>5</b>           | <b>6</b>                          |
|---------|--------------------|-------------------|--------------------|--------------------|-----------------------------------|
| P–N     | 1.734(2)–1.776(1)  | 1.727(4)–1.774(4) | 1.739(2)–1.776(2)  | 1.736(1)–1.770(1)  | 1.650(1)–1.826(1)                 |
| P–C     | 1.911(2)           | 1.927(4)          | 1.916(1)           | 1.900(2)           | 1.885(1)                          |
| P–O     | 1.672(1)           | 1.680(2)          | 1.673(2)           | 1.656(1)           | 1.676(1), 1.670(1) <sup>[a]</sup> |
| C–O     | 1.450(2)           | 1.455(5)          | 1.455(2)           | 1.451(2)           | 1.439(2), 1.465(2) <sup>[b]</sup> |
| N–P–N   | 78.81(6), 79.90(6) | 79.1(1), 80.1(2)  | 78.87(6), 79.74(6) | 78.79(5), 79.52(5) | 102.30(6)                         |
| P–N–P   | 90.88(6), 92.40(6) | 90.8(1), 92.7(2)  | 90.85(6), 92.33(6) | 91.57(5), 91.32(5) | 115.84(6)                         |
| N–P–P–N | 132.72(1)          | 133.5(2)          | 132.47(9)          | 131.73(8)          | 100.04(8)                         |

[a] P–O(*t*Bu), [b] O–C(Me<sub>3</sub>)

### 3 Syntheses of compounds

#### 3.1 $[P(\mu\text{-N}Ter)]_2 \cdot \text{PhCHO}$ (2)

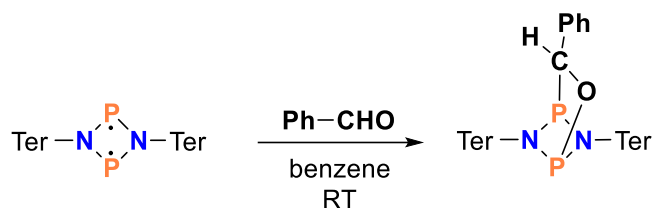

PhCHO (30 mg, 0.28 mmol) is added to a solution of  $[P(\mu\text{-N}Ter)]_2$  (200 mg, 0.28 mmol) in benzene (10 mL) at RT with a microliter syringe, resulting in an immediate colour change from orange to light yellow. The reaction mixture is stirred for further three hours. After the reaction time, all volatile components are removed *in vacuo* ( $1 \times 10^{-3}$  mbar) at 50 °C (water bath). The residue is dissolved in fresh benzene and insoluble solids are removed by filtration over celite. The clear solution is concentrated *in vacuo* ( $1 \times 10^{-3}$  mbar) to incipient crystallization and stored overnight. After removal of the supernatant colourless crystals remain. **Yield:** 193 mg (0.234 mmol, 84 %).

**Mp.** 138-143 °C. **CHN** calcd. (found) in %: C 80.27 (79.70), H 6.86 (6.56), N 3.40 (3.22).  **$^{31}\text{P}\{^1\text{H}\}$  NMR** (toluene-*d*<sub>8</sub>, 121.5 MHz)  $\delta$  = 178.5 (d,  $^2J(^{31}\text{P}, ^{31}\text{P}) = 15$  Hz, 1 P, P-CH), 214.9 (d,  $^2J(^{31}\text{P}, ^{31}\text{P}) = 15$  Hz, 1 P, P-O).  **$^1\text{H}$  NMR** (toluene-*d*<sub>8</sub>, 300.1 MHz):  $\delta$  = 1.61 (s, 6 H, *o/p*-CH<sub>3</sub>), 2.04 (s, 6 H, *o/p*-CH<sub>3</sub>), 2.09 (s, 6 H, *o/p*-CH<sub>3</sub>), 2.11 (s, 6 H, *o/p*-CH<sub>3</sub>), 2.35 (s, 6 H, *o/p*-CH<sub>3</sub>), 2.38 (s, 6 H, *o/p*-CH<sub>3</sub>), 4.86 (d,  $^2J(^1\text{H}-^{31}\text{P}) = 11.3$  Hz, 1 H, OCH), 6.56-7.06 (14 H (*Ter*), 5 H (*PhCHO*)).  **$^{13}\text{C}\{^1\text{H}\}$  NMR** (toluene-*d*<sub>8</sub>, 75.5 MHz)  $\delta$  = 20.9 (s, *o/p*-CH<sub>3</sub>) 21.3 (s, *o/p*-CH<sub>3</sub>), 21.4 (s, *o/p*-CH<sub>3</sub>), 21.6 (s, *o/p*-CH<sub>3</sub>), 120.8 (s, CH (arom.)), 121.2 (s, CH (arom.)), 126.7 (s, CH (arom.)), 127.4 (s, CH (arom.)), 128.1 (s, CH (arom.)), 129.0 (s, CH (arom.)), 129.1 (s, CH (arom.)), 130.2 (s, CH (arom.)), 130.9 (s, CH (arom.)), 131.3 (s, CH (arom.)), 136.8 (s, CH (arom.)), 137.2 (s, CH (arom.)). **IR** (ATR, 32 scans, cm<sup>-1</sup>):  $\tilde{\nu}$  = 2912(m), 2853 (w), 1610 (w), 1581 (w), 1482 (w), 1402 (s), 1375 (m), 1290(w), 1224



(vs), 1148 (m), 1082 (m), 1031 (w), 934 (m), 897 (s), 843 (vs), 791(m), 769 (m), 754 (s), 732 (m), 705 (vs), 690 (s), 658 (m), 567 (m), 478 (m), 462 (m), 439 (s). **Raman** (633 nm, 15 s, 20 scans,  $\text{cm}^{-1}$ ):  $\tilde{\nu}$  = 3130 (1), 3083 (1), 3070 (2), 3046 (2), 3008 (2), 2967 (1), 2947 (2), 2918 (5), 2855 (1), 2729 (1), 1703 (1), 1612 (4), 1604 (4), 1581 (2), 1498 (1), 1482 (1), 1438 (2), 1421 (1), 1405 (1), 1383 (2), 1377 (2), 1344 (1), 1303 (8), 1283 (2), 126 (4), 1249 (1), 1238 (1), 1227 (1), 1209 (3), 1188 (1), 1172 (1), 1165 (1), 1159 (1), 1149 (2), 1099 (1), 1090 (1), 1032 (1), 102 (10), 1004 (6), 993 (3), 945 (1), 845 (1), 743 (1), 735 (1), 727 (1), 705 (1), 693 (1), 657 (2), 620 (2), 616 (2), 592 (2), 580 (7), 568 (3), 559 (2), 551 (1), 546 (2), 536 (1), 523 (2), 511 (1), 504 (1), 474 (1), 461 (1), 422 (1), 379 (1), 352 (1), 338 (1), 326 (1), 285 (1), 266 (2), 233 (2), 219 (1), 188 (1), 155 (2). **MS** (CI, pos., isobutane)  $m/z$ : 823  $[\text{MH}]^+$ , 716  $[(\text{TerNP})_2]^+$ , 418  $[\text{TerNCHPhH}]^+$ , 330  $[\text{TerNH}_3]^+$ , 107  $[\text{PhCHOH}]^+$ .

Single crystals suitable for X-ray diffraction can be grown from saturated benzene solution at ambient temperature.

**Figure S1:** NMR, IR and Raman spectra of  $[\text{P}(\mu\text{-NTer})]_2 \cdot \text{PhCHO}$  (solvent signals indicated by asterisks).

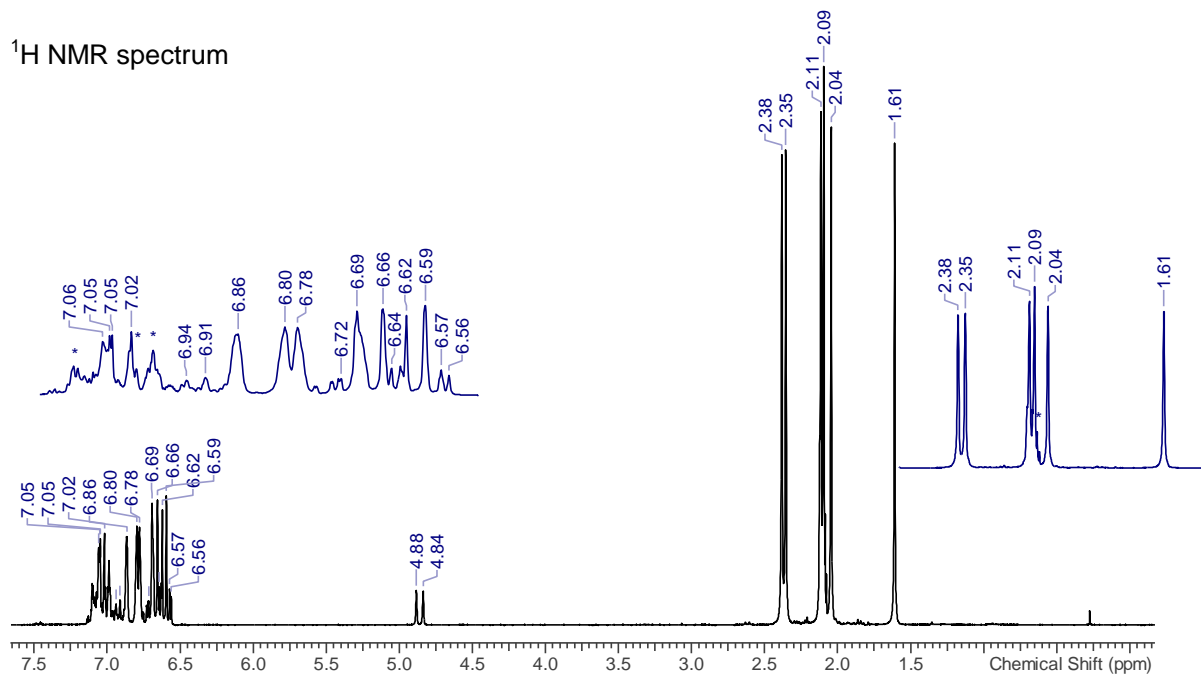

Figure S1 continued.

$^{13}\text{C}$  NMR spectrum

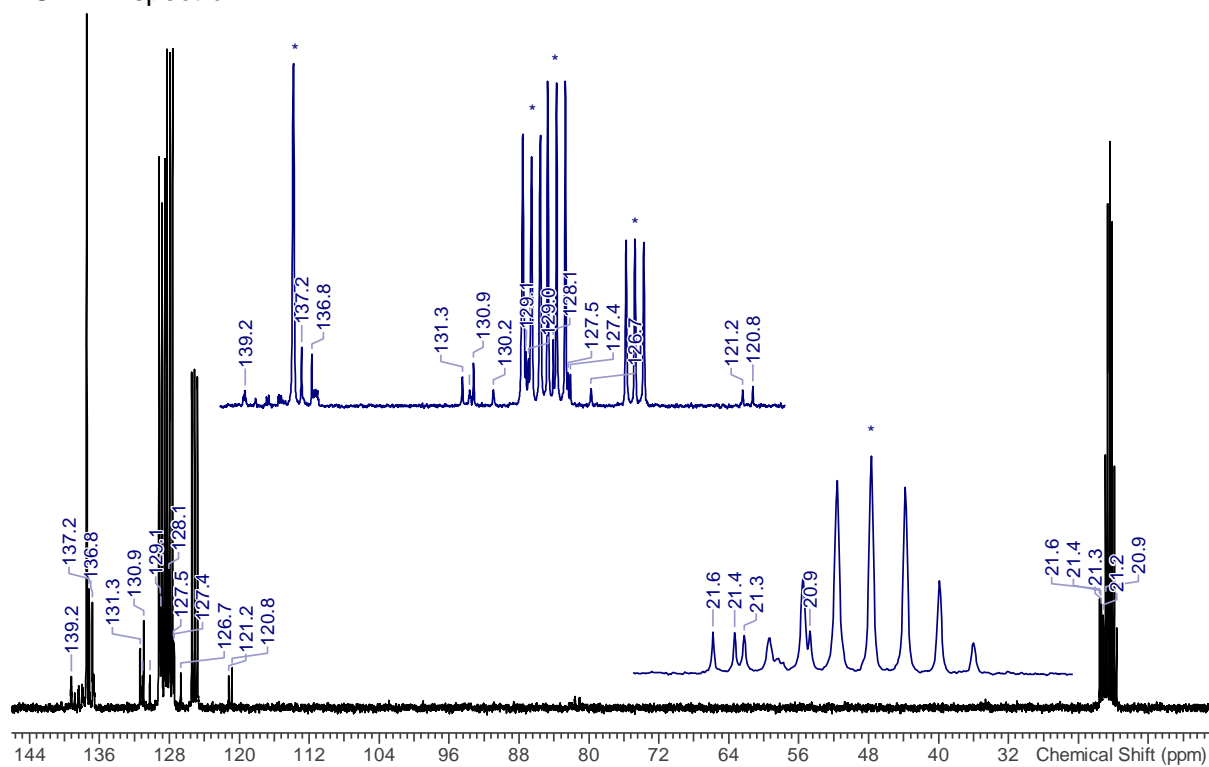

$^{31}\text{P}$  NMR spectrum

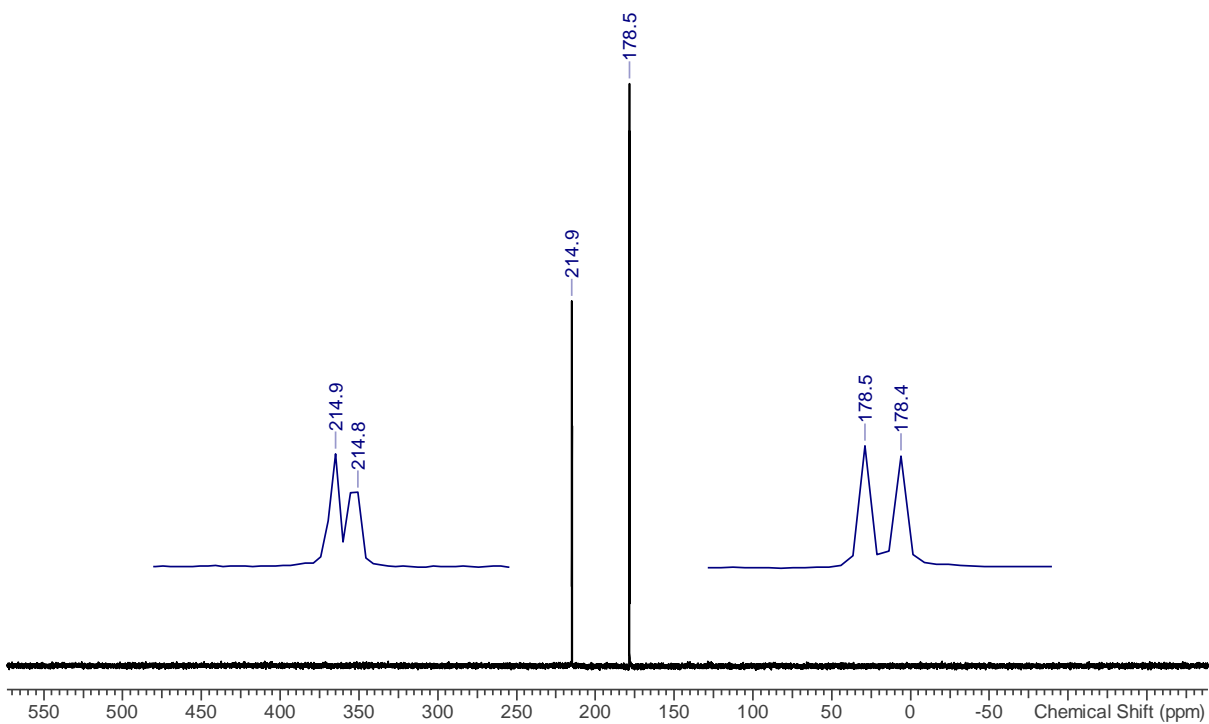

Figure S1 continued.

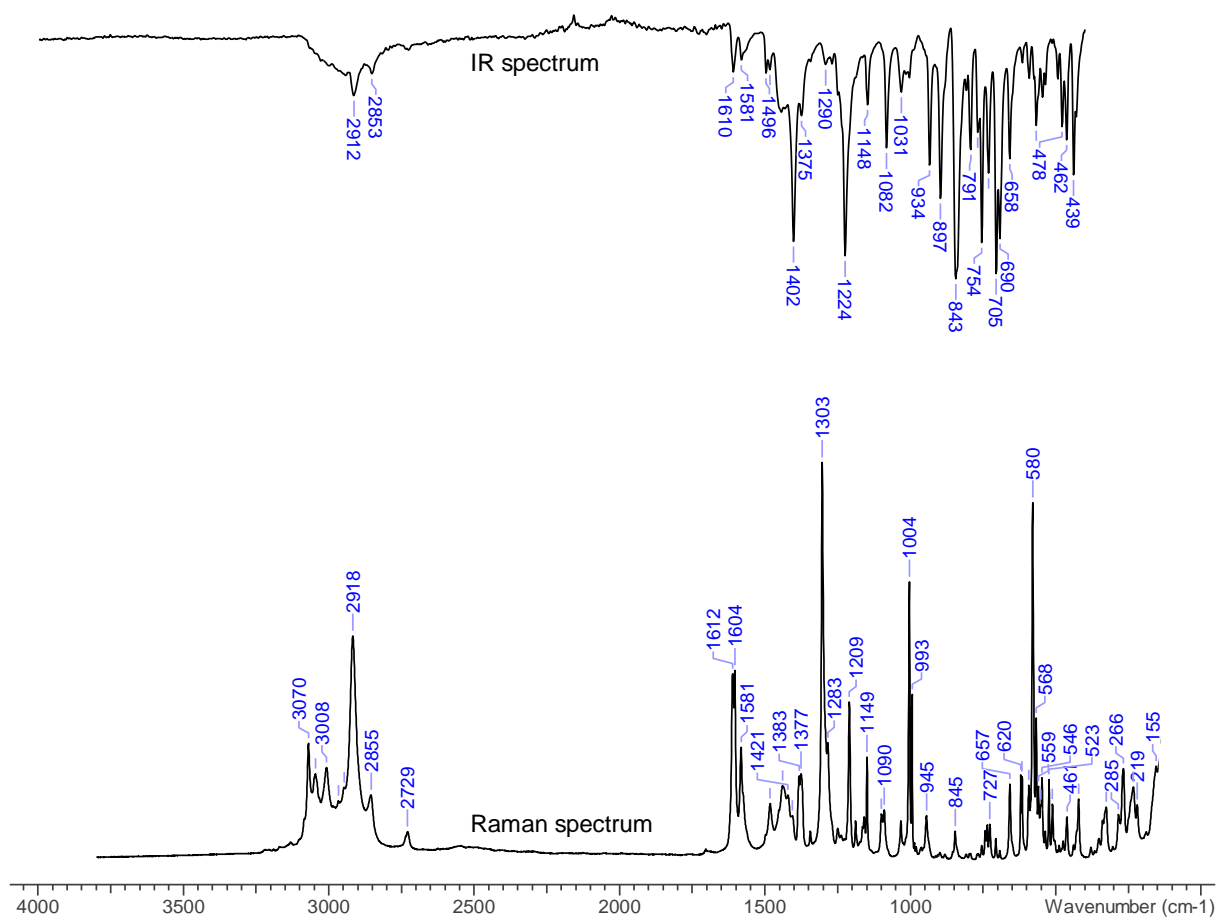

### 3.2 $[P(\mu\text{-N}Ter)]_2 \cdot C_6H_4NO_2CHO$ (3)

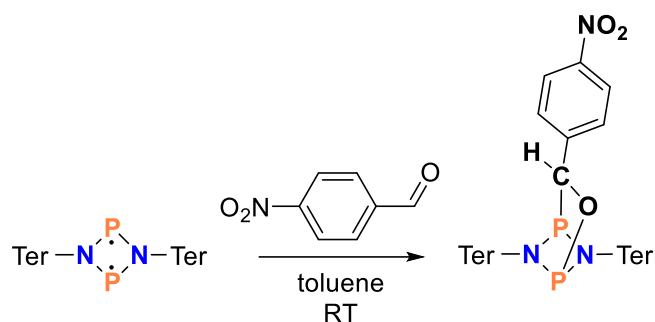

*p*-Nitrobenzaldehyde (42.1 mg, 0.28 mmol) and  $[P(\mu\text{-N}Ter)]_2$  (200 mg, 0.28 mmol) are dissolved in toluene (10 mL) at RT, resulting in a brown solution that is stirred for three hours. After the reaction time, all volatile components are removed *in vacuo* ( $1 \times 10^{-3}$  mbar) at 50 °C (water bath). The residue is dissolved in fresh toluene and insoluble solids are removed by filtration over celite. The clear solution is concentrated *in vacuo* ( $1 \times 10^{-3}$  mbar) to incipient crystallization and stored overnight. Brown crystals can be obtained. **Yield:** 140 mg (0.16 mmol, 57 %).

**Mp.** 150-155 °C **CHN** calcd. (found) in %: C 76.11 (75.83), H 6.39 (6.56), N 4.84 (4.72).

**$^{31}P\{^1H\}$  NMR** (toluene-*d*<sub>8</sub>, 121.5 MHz):  $\delta$  = 180.1 (d,  $^2J(^{31}P, ^{31}P)$  = 17 Hz, 1 P, *P*-CH), 216.6 (d,  $^2J(^{31}P, ^{31}P)$  = 17 Hz, 1 P, *P*-O).  **$^1H$  NMR** (toluene-*d*<sub>8</sub>, 300.1 MHz):  $\delta$  = 1.44 (s, 6 H, *o/p*-CH<sub>3</sub>), 2.00 (s, 6 H, *o/p*-CH<sub>3</sub>), 2.03 (s, 6 H, *o/p*-CH<sub>3</sub>), 2.06 (s, 6 H, *o/p*-CH<sub>3</sub>), 2.34 (s, 6 H, *o/p*-CH<sub>3</sub>), 2.35 (s, 6 H, *o/p*-CH<sub>3</sub>), 4.76 (d,  $^2J(^1H, ^{31}P)$  = 10.7 Hz, 1H, OCHPhNO<sub>2</sub>), 6.47-7.03 (14H, Ter, 2H, PhNO<sub>2</sub>), 7.90 (s, 1H, PhNO<sub>2</sub>), 7.93 (s, 1H, PhNO<sub>2</sub>).  **$^{13}C\{^1H\}$  NMR** (toluene-*d*<sub>8</sub>, 75.5 MHz):  $\delta$  = 20.9 (s, *o/p*-CH<sub>3</sub>), 21.2 (s, *o/p*-CH<sub>3</sub>), 21.4 (s, *o/p*-CH<sub>3</sub>), 21.5 (s, *o/p*-CH<sub>3</sub>), 21.8 (s, *o/p*-CH<sub>3</sub>), 21.9 (s, *o/p*-CH<sub>3</sub>), 81.5 (dd,  $^1J(^{13}C, ^{31}P)$  = 41.8 Hz,  $^2J(^{13}C, ^{31}P)$  = 3.9 Hz, POCHP), 121.7 (s, CH (arom.)), 122.2 (s, CH (arom.)), 127.6 (s, CH (arom.)), 127.7 (s, CH (arom.)), 129.3 (s, CH (arom.)), 129.4 (s, CH (arom.)), 129.5 (s, CH (arom.)), 129.7 (s, CH (arom.)), 131.0 (s, CH (arom.)), 131.5 (s, CH (arom.)), 136.8 (s, C (arom.)), 137.1 (s, C (arom.)), 137.5 (s, C (arom.)), 137.5 (s, C (arom.)), 138.0 (s, C (arom.)), 138.3 (s, C (arom.)), 139.0 (s, C (arom.)), 139.5 (s, C (arom.)), 146.5 (s, C (arom.)), 147.3 (s, C (arom.)). **IR** (ATR, 32 scans, cm<sup>-1</sup>):  $\tilde{\nu}$  = 2906 (m), 2844 (w), 1601 (w), 1510 (m), 1434 (m),

1397 (s), 1371 (m), 1338 (s), 1264 (m), 1216 (vs), 1079 (m), 1027 (m), 1007 (m), 1138 (m), 982 (m), 933 (s), 92 (m), 892 (s), 847 (vs), 838 (vs), 791 (s), 752 (s), 709 (s), 688 (s), 653 (s), 557 (m), 534 (m), 477 (s), 462 (m), 436 (s), 429 (s). **Raman** (633 nm, 15 s, 20 scans,  $\text{cm}^{-1}$ ):  $\tilde{\nu} = 3044$  (1), 3003 (1), 2918 (1), 2855 (1), 2731 (1), 2675 (1), 2484 (1), 2449 (1), 1593 (10), 1491 (1), 1417 (1), 1375 (1), 1342 (10), 1337 (10), 1302 (2), 1283 (1), 1221 (1), 1206 (5), 1185 (1), 1177 (1), 1158 (1), 1140 (3), 1106 (7), 1014 (1), 935 (1), 836 (1), 827 (2), 804 (1), 723 (1), 709 (1), 654 (2), 623 (1), 593 (1), 578 (1), 567 (1), 554 (1), 542 (1), 534 (1), 475 (1), 461 (2), 418 (1), 336 (1), 317 (1), 292 (1), 229 (1). **MS** (CI, pos., isobutane)  $m/z$ : 659, 463  $[\text{TerNCHPhNO}_2\text{H}]^+$ , 386  $[\text{TerNH}_2\text{C}_4\text{H}_9]^+$ , 372, 368, 330  $[\text{TerNH}_3]^+$ , 326, 152  $[\text{PhNO}_2\text{CHOH}]^+$ .

Single crystals suitable for X-ray diffraction can be grown from saturated toluene solution at ambient temperature.

**Figure S2:** NMR, IR and Raman spectra of  $[\text{P}(\mu\text{-Nter})]_2 \cdot \text{C}_6\text{H}_4\text{NO}_2\text{CHO}$  (solvent signals indicated by asterisks).

$^1\text{H}$  NMR spectrum

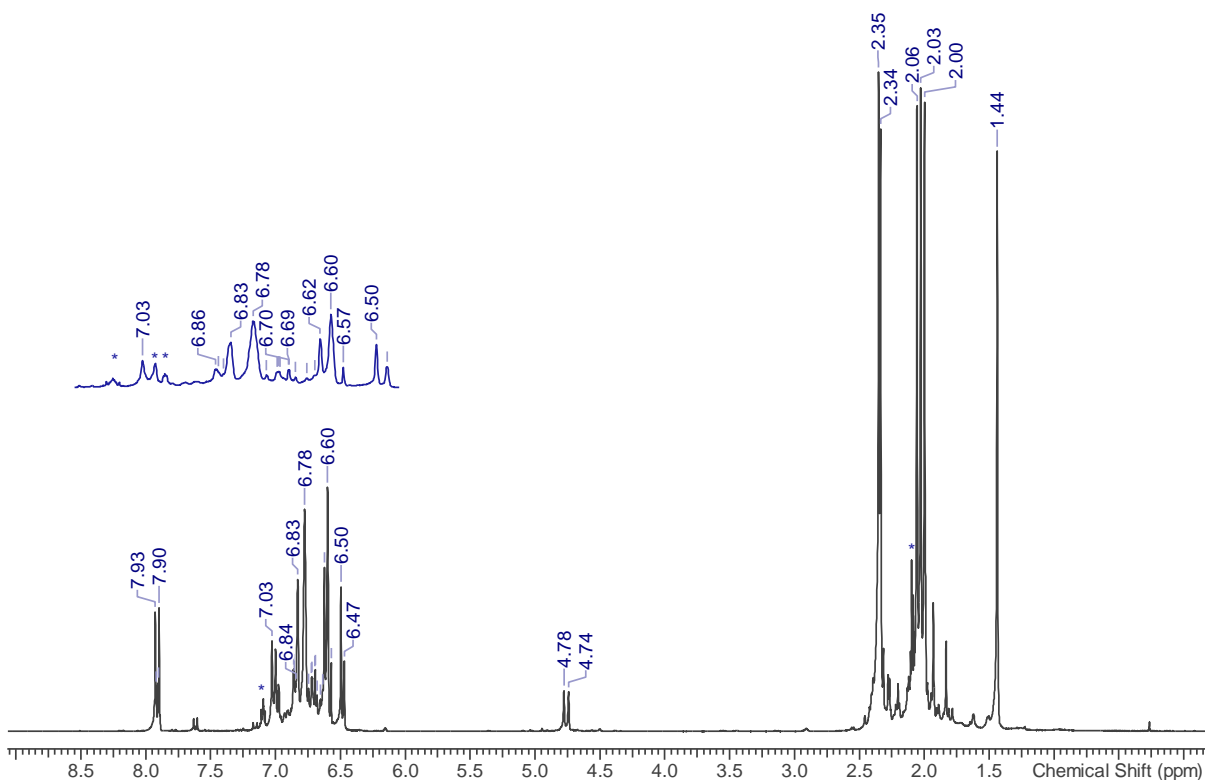

Figure S2 continued.

$^{13}\text{C}$  NMR spectrum

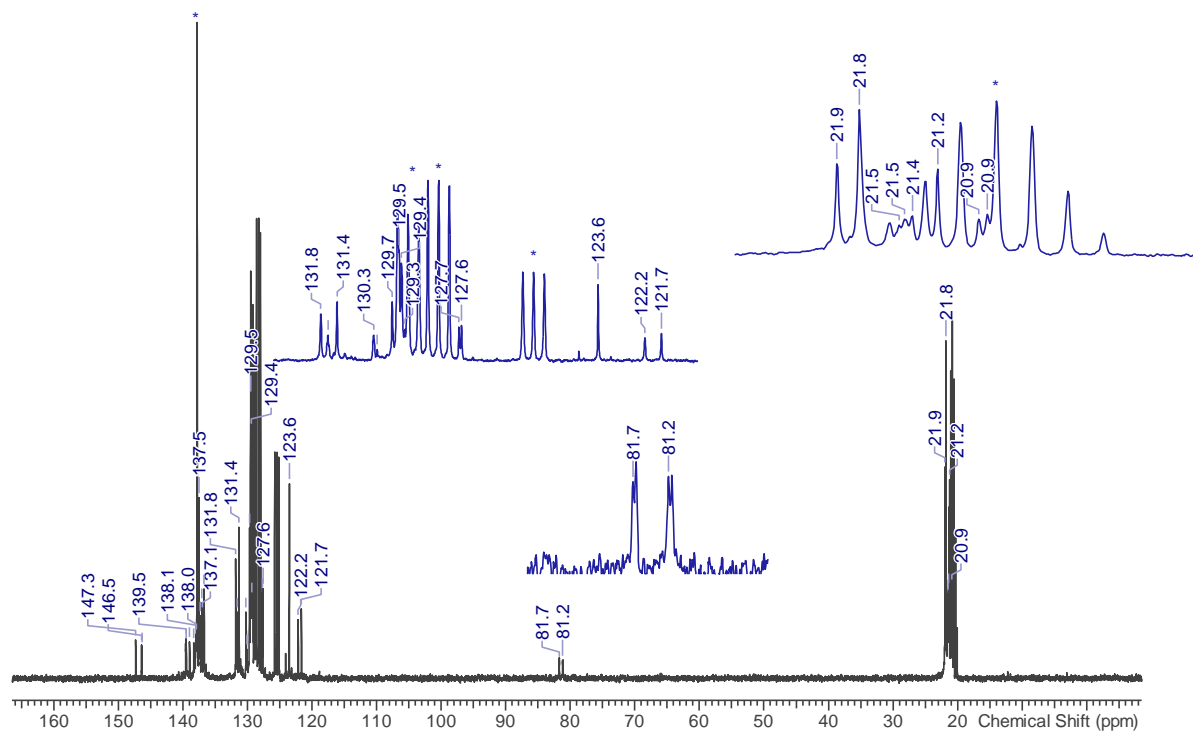

$^{31}\text{P}$   $\{^1\text{H}\}$  NMR spectrum

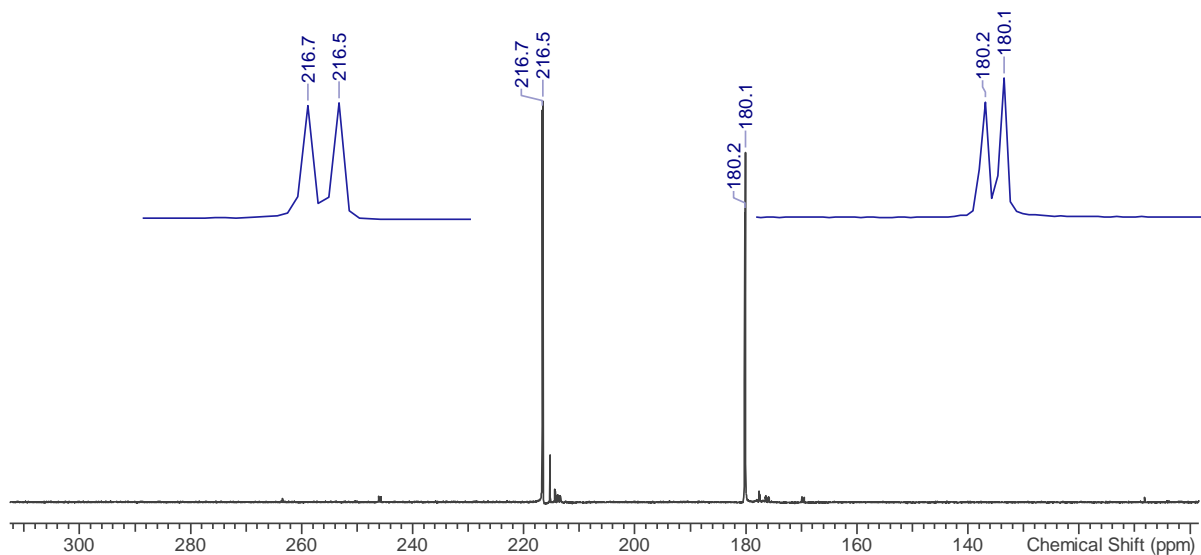

Figure S2 continued.

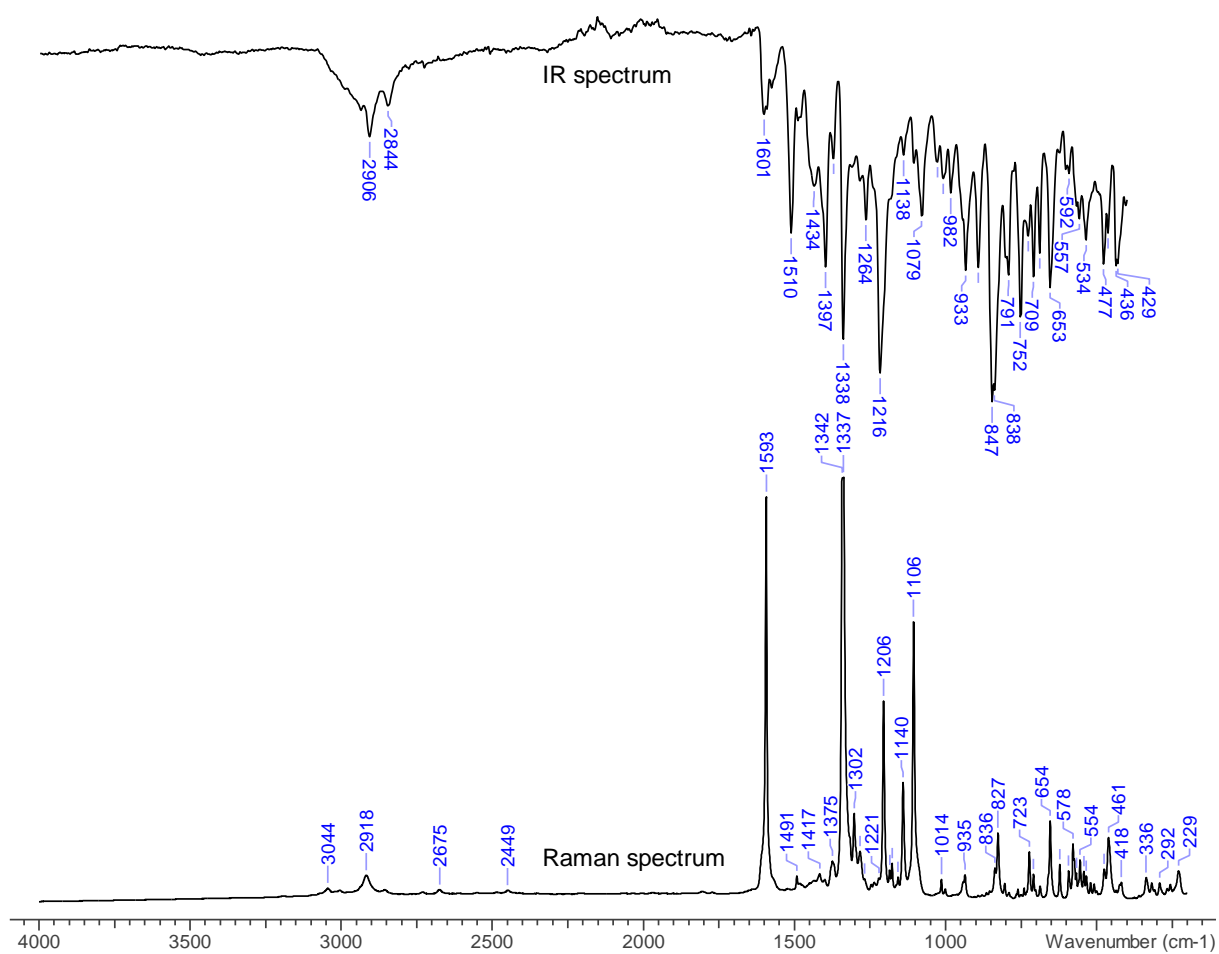

### 3.3 [P( $\mu$ -NTer)]<sub>2</sub> · C<sub>6</sub>H<sub>4</sub>ClCHO (4)

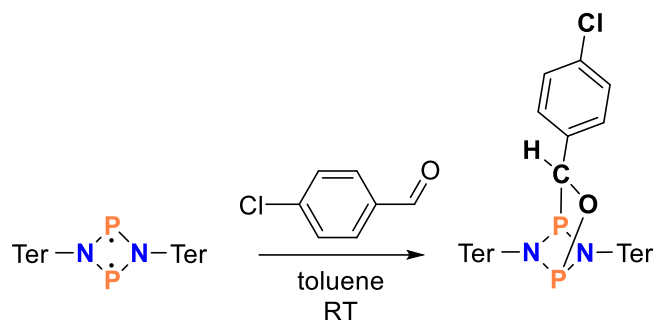

*p*-Chlorobenzaldehyde (39 mg, 0.28 mmol) and [P( $\mu$ -NTer)]<sub>2</sub> (200 mg, 0.28 mmol) are dissolved in toluene (10 mL) at RT, resulting in a light green solution that is stirred for three hours. After the reaction time, all volatile components are removed *in vacuo* ( $1 \times 10^{-3}$  mbar) at 50 °C (water bath). The residue is dissolved in fresh toluene and insoluble solids are removed by filtration over celite. The clear solution is concentrated *in vacuo* ( $1 \times 10^{-3}$  mbar) to incipient crystallization and stored overnight. After removal of the supernatant colourless crystals are obtained. **Yield:** 199 mg (0.23 mmol, 83 %).

**Mp.** 157-162 °C **CHN** calcd. (found) in %: C 77.04 (76.57), H 6.47 (6.00), N 3.27 (3.07).

**<sup>31</sup>P{<sup>1</sup>H} NMR** (C<sub>6</sub>D<sub>6</sub>, 202.5 MHz):  $\delta$  = 178.3 (s (br), 1 P, *P*-CH), 215.4 (s (br), 1 P, *P*-O).

**<sup>31</sup>P{<sup>1</sup>H} NMR** (toluene-*d*<sub>8</sub>, 121.5 MHz):  $\delta$  = 178.4 (d,  $^2J(^{31}\text{P}, ^{31}\text{P}) = 16$  Hz, 1 P, *P*-CH), 215.5 (d,  $^2J(^{31}\text{P}, ^{31}\text{P}) = 16$  Hz, 1 P, *P*-O).

**<sup>1</sup>H NMR** (C<sub>6</sub>D<sub>6</sub>, 500.2 MHz):  $\delta$  = 1.62 (s, 6 H, *o/p*-CH<sub>3</sub>), 2.06 (s, 6 H, *o/p*-CH<sub>3</sub>), 2.09 (s, 6 H, *o/p*-CH<sub>3</sub>), 2.10 (s, 6 H, *o/p*-CH<sub>3</sub>), 2.32 (s, 6 H, *o/p*-CH<sub>3</sub>), 2.36 (s, 6 H, *o/p*-CH<sub>3</sub>) 4.82 (d,  $^2J(^1\text{H}, ^{31}\text{P}) = 11.1$  Hz, 1H, OCHPhCl), 6.59-7.08 (14H, Ter, 4H, PhCl).

**<sup>1</sup>H NMR** (toluene-*d*<sub>8</sub>, 300.1 MHz):  $\delta$  = 1.57 (s, 6 H, *o/p*-CH<sub>3</sub>), 2.02 (s, 6 H, *o/p*-CH<sub>3</sub>), 2.05 (s, 6 H, *o/p*-CH<sub>3</sub>), 2.08 (s, 6 H, *o/p*-CH<sub>3</sub>), 2.34 (s, 6 H, *o/p*-CH<sub>3</sub>), 2.36 (s, 6 H, *o/p*-CH<sub>3</sub>) 4.74 (d,  $^2J(^1\text{H}, ^{31}\text{P}) = 11.3$  Hz, 1H, OCHPhCl), 6.53-7.06 (14H, Ter, 4H, PhCl).

**<sup>13</sup>C{<sup>1</sup>H} NMR** (C<sub>6</sub>D<sub>6</sub>, 125.8 MHz):  $\delta$  = 20.7 (s, *p/o*-CH<sub>3</sub>), 21.0 (s, *p/o*-CH<sub>3</sub>), 21.0 (s, *p/o*-CH<sub>3</sub>), 21.2 (s, *p/o*-CH<sub>3</sub>), 21.5 (s, *p/o*-CH<sub>3</sub>), 21.7 (s, *p/o*-CH<sub>3</sub>), 21.8 (s, *p/o*-CH<sub>3</sub>), 21.9 (s, *p/o*-CH<sub>3</sub>), 81.1 (dd,  $^1J(^{13}\text{C}, ^{31}\text{P}) = 41.4$  Hz,  $^2J(^{13}\text{C}, ^{31}\text{P}) = 3.7$  Hz, POCHP), 121.5 (s, CH (arom.)), 121.8 (s, CH (arom.)), 128.7 (s, CH (arom.)), 129.4 (s, CH (arom.)), 129.5 (s, CH (arom.)), 129.5 (s, CH (arom.)), 131.3 (s, CH (arom.)), 131.7 (s, CH (arom.)), 133.0 (s, C



(arom.), 136.8 (s, C (arom.)), 137.0 (s, C (arom.)), 137.1 (s (br.), C (arom.)), 137.4 (s, C (arom.)), 137.5 (s, C (arom.)), 137.7 (s, C (arom.)), 138.2 (s, C (arom.)), 138.9 (s, C (arom.)), 139.4 (s, C (arom.)), 139.6 (s, C (arom.)). **IR** (ATR, 32 scans,  $\text{cm}^{-1}$ ):  $\tilde{\nu}$  = 2936 (w), 2908 (w), 2846 (w), 2723 (vw), 1699 (vw), 1605 (w), 1570 (w), 1484 (m), 1397 (s), 1373 (m), 1286 (w), 1264 (w), 1221 (s), 1149 (m), 1079 (s), 1029 (m), 1013 (m), 982 (w), 943 (w), 923 (s), 892 (s), 836 (vs), 791 (m), 752 (s), 732 (s), 701 (w), 688 (m), 670 (s), 660 (s), 625 (w), 592 (m), 567 (m), 542 (m), 493 (m), 481 (s), 436 (s), 423 (m). **Raman** (633 nm, 15 s, 20 scans,  $\text{cm}^{-1}$ ):  $\tilde{\nu}$  = 3060 (2), 3046 (2), 3021 (2), 3016 (2), 3010 (2), 2952 (2), 2920 (3), 2859 (2), 2733 (2), 1613 (3), 1595 (3), 1581 (3), 1483 (1), 1440 (1), 1421 (2), 1384 (2), 1304 (4), 1290 (3), 1272 (1), 1205 (3), 1187 (1), 1153 (1), 1088 (3), 1005 (1), 945 (1), 735 (1), 703 (1), 663 (1), 627 (1), 594 (3), 581 (4), 576 (3), 522 (1), 510 (1), 486 (1), 463 (1), 422 (1), 378 (1), 351 (1), 339 (1), 321 (1), 270 (2), 242 (2). **MS** (CI, pos., isobutane)  $m/z$ : 893  $[\text{M}]^+$ , 716  $[(\text{TerNP})_2]^+$ , 452  $[\text{TerNCHPhClH}]^+$ , 358  $[\text{TerNP}]^+$ , 141  $[\text{PhClCHOH}]^+$ .

Single crystals suitable for X-ray diffraction can be grown from saturated toluene solution at ambient temperature.

**Figure S3:** NMR, IR and Raman spectra of  $[P(\mu\text{-Nter})]_2 \cdot C_6H_4ClCHO$  (solvent signals indicated by asterisks).

$^1H$  NMR spectrum

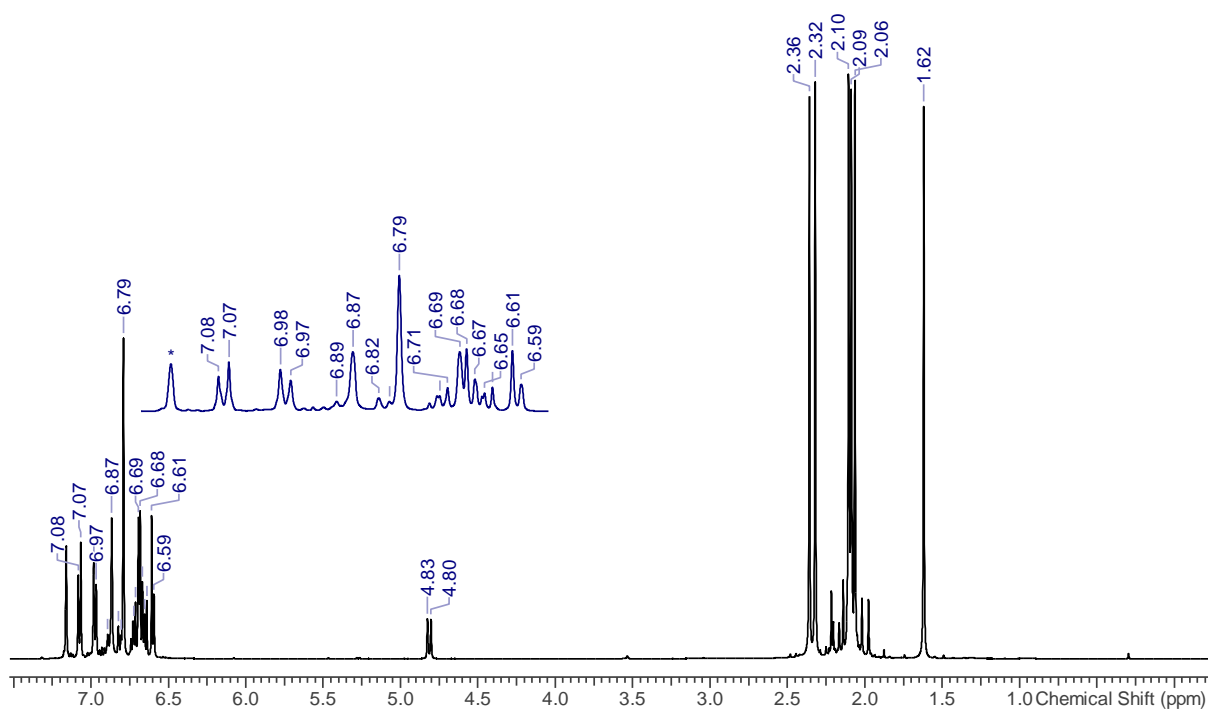

$^{13}C$  NMR spectrum

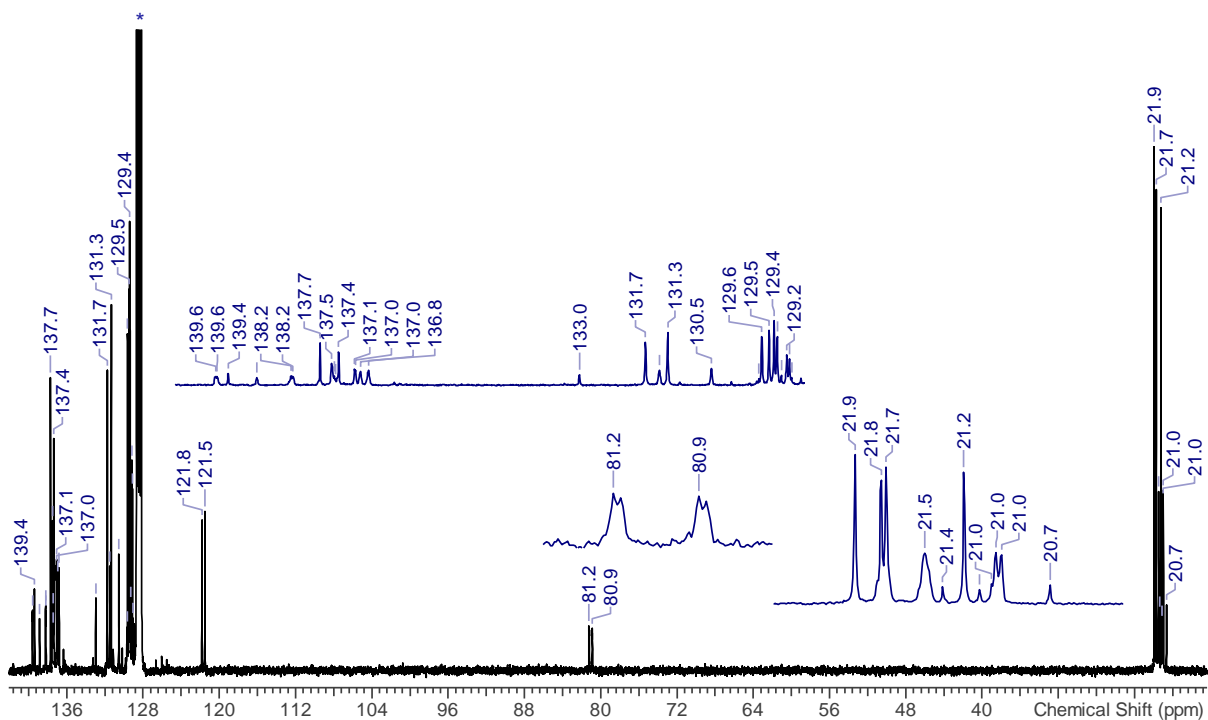

**Figure S3** continued.

$^{31}\text{P}$  NMR spectrum

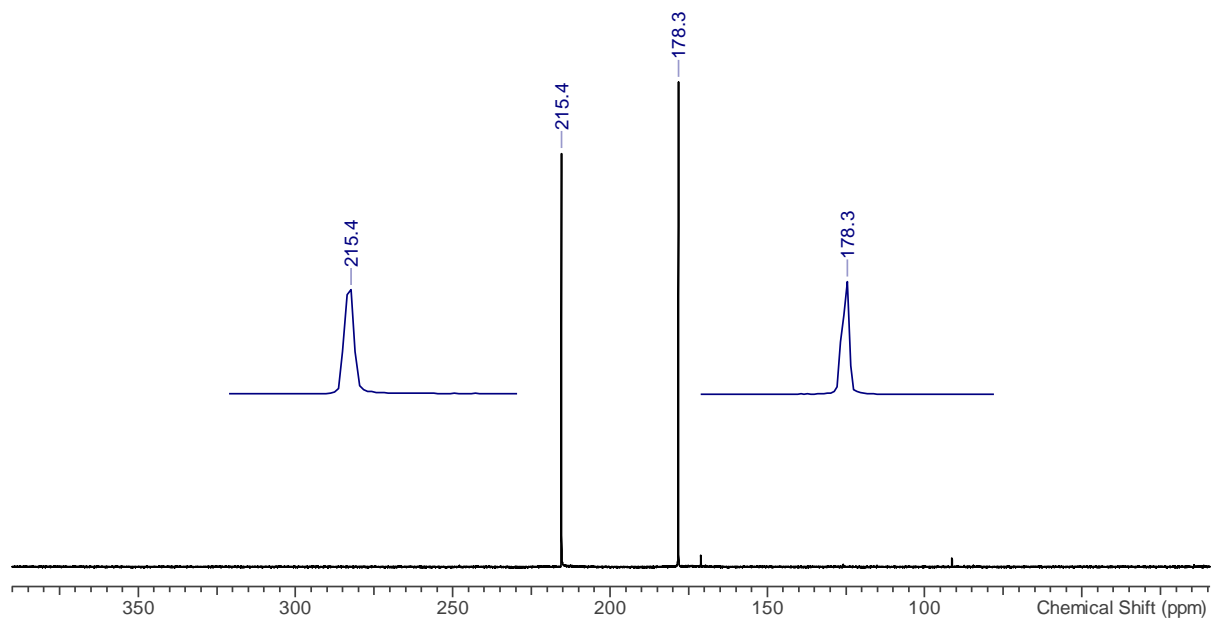

Figure S3 continued.

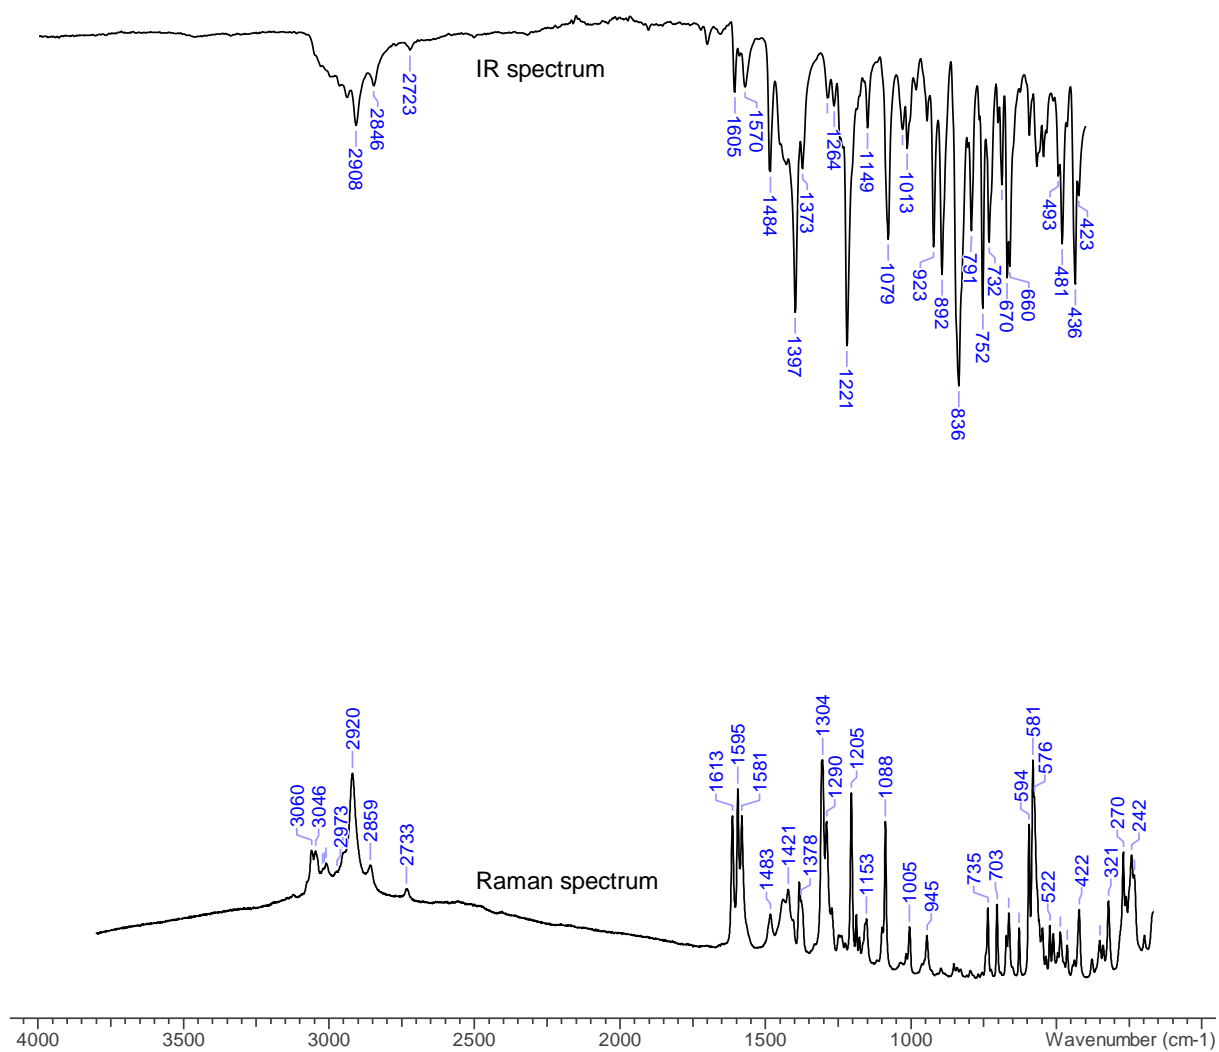

### 3.4 [P( $\mu$ -NTer)]<sub>2</sub> · EtCHO (5)

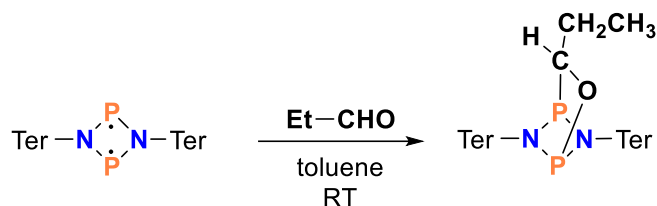

EtCHO (16 mg, 0.28 mmol) is added to a solution of [P( $\mu$ -NTer)]<sub>2</sub> (200 mg, 0.28 mmol) in toluene (10 mL) at RT with a microliter syringe, resulting in an immediate colour change from orange to light yellow. The reaction mixture is stirred for further three hours. After the reaction time, all volatile components are removed *in vacuo* ( $1 \times 10^{-3}$  mbar) at 50 °C (water bath). The residue is dissolved in fresh toluene and insoluble solids are removed by filtration over celite. The clear solution is concentrated *in vacuo* ( $1 \times 10^{-3}$  mbar) to incipient crystallization and stored overnight. After removal of the supernatant colourless crystals remain. **Yield:** 172 mg (0.22 mmol, 79 %).

**Mp.** 140-145°C **CHN** calcd. (found) in %: C 78.92 (78.52), H 7.15 (6.74), N 3.68 (3.27).

**<sup>31</sup>P{<sup>1</sup>H} NMR** (C<sub>6</sub>D<sub>6</sub>, 121.5 MHz):  $\delta$  = 176.6 (d,  $^2J(^{31}\text{P}, ^{31}\text{P})$  = 13 Hz, 1 P, *P*-CH), 212.1 (d,  $^2J(^{31}\text{P}, ^{31}\text{P})$  = 13 Hz, 1 P, *P*-O). **<sup>31</sup>P{<sup>1</sup>H} NMR** (toluene-*d*<sub>8</sub>, 121.5 MHz):  $\delta$  = 176.4 (d,  $^2J(^{31}\text{P}, ^{31}\text{P})$  = 14 Hz, 1 P, *P*-CH), 211.9 (d,  $^2J(^{31}\text{P}, ^{31}\text{P})$  = 14 Hz, 1 P, *P*-O). **<sup>1</sup>H NMR** (C<sub>6</sub>D<sub>6</sub>, 300.1 MHz):  $\delta$  = 0.74 (t,  $^3J(^1\text{H}, ^1\text{H})$  = 7.4 Hz, 3H, OCH<sub>2</sub>CH<sub>3</sub>), 1.10 (m, 1H, OCH<sub>2</sub>CH<sub>3</sub>), 1.40 (m, 1H, OCH<sub>2</sub>CH<sub>3</sub>), 1.89 (s, 6 H, *o/p*-CH<sub>3</sub>), 1.98 (s, 6 H, *o/p*-CH<sub>3</sub>), 2.16 (s, 6 H, *o/p*-CH<sub>3</sub>), 2.30 (s, 6 H, *o/p*-CH<sub>3</sub>), 2.31 (s, 6 H, *o/p*-CH<sub>3</sub>), 2.35 (s, 6 H, *o/p*-CH<sub>3</sub>) 3.47 (m, 1H, OCHCH<sub>2</sub>), 6.67-6.94 (14 H (*Ter*)). **<sup>1</sup>H NMR** (toluene-*d*<sub>8</sub>, 300.1 MHz):  $\delta$  = 0.71 (t,  $^3J(^1\text{H}, ^1\text{H})$  = 7.4 Hz, 3H, OCH<sub>2</sub>CH<sub>3</sub>), 1.10 (m, 1H, OCH<sub>2</sub>CH<sub>3</sub>), 1.40 (m, 1H, OCH<sub>2</sub>CH<sub>3</sub>), 1.84 (s, 6 H, *o/p*-CH<sub>3</sub>), 1.92 (s, 6 H, *o/p*-CH<sub>3</sub>), 2.11 (s, 6 H, *o/p*-CH<sub>3</sub>), 2.24 (s, 6 H, *o/p*-CH<sub>3</sub>), 2.30 (s, 6 H, *o/p*-CH<sub>3</sub>), 2.35 (s, 6 H, *o/p*-CH<sub>3</sub>) 3.40 (m, 1H, OCHCH<sub>2</sub>), 6.61-6.89 (14 H (*Ter*)). **<sup>13</sup>C{<sup>1</sup>H} NMR** (C<sub>6</sub>D<sub>6</sub>, 75.5 MHz):  $\delta$  = 21.5 (s, *p/o*-CH<sub>3</sub>), 21.8 (s, *p/o*-CH<sub>3</sub>), 21.9 (s, *p/o*-CH<sub>3</sub>), 120.9 (s, C (arom.)), 121.4 (s, C (arom.)), 129.1 (s, C (arom.)), 129.3 (s, C (arom.)), 129.6 (s, C (arom.)), 131.3 (s, C (arom.)), 137.4 (s, C (arom.)). **IR** (ATR, 32 scans, cm<sup>-1</sup>):  $\tilde{\nu}$  = 2914 (m), 2855 (w), 1610 (w), 1581 (w), 1496 (w), 1482 (w), 1402 (s), 1375 (m), 1268 (w), 1224 (vs), 1148 (m), 1082

(m), 1031 (m), 985 (w), 934 (s), 897 (s), 843 (vs), 806 (m), 794 (m), 769 (m), 754 (s), 732 (s), 705 (vs), 690 (s), 658 (m), 592 (m), 567 (m), 478 (m), 462 (m), 439 (s), 429 (m). **Raman** (633 nm, 15 s, 20 scans,  $\text{cm}^{-1}$ ):  $\tilde{\nu}$  = 3072 (1), 3041 (1), 2988 (1), 2916 (3), 2856 (1), 2730 (1), 1613 (4), 1582 (3), 1482 (1), 1421 (2), 1379 (2), 1374 (1), 1337 (1), 1305 (8), 1284 (2), 1270 (1), 1257 (1), 1246 (1), 1240 (1), 1188 (1), 1160 (1), 1102 (1), 1092 (2), 1006 (1), 959 (1), 956 (1), 945 (1), 738 (2), 728 (1), 710 (1), 703 (1), 641 (1), 591 (4), 580 (6), 569 (4), 551 (1), 544 (1), 523 (1), 511 (1), 501 (1), 486 (2), 465 (2), 422 (3), 356 (1), 338 (1), 319 (1), 271 (3), 255 (1), 237 (2), 233 (2), 155 (3), 119 (4). **MS** (CI, pos., isobutane)  $m/z$ : 831  $[\text{MC}_4\text{H}_9]^+$ , 775  $[\text{MH}]^+$ , 716  $[(\text{TerNP})_2]^+$ , 330  $[\text{TerNH}_3]^+$ .

Single crystals suitable for X-ray diffraction can be grown from saturated toluene solution at ambient temperature.

**Figure S4:** NMR, IR and Raman spectra of  $[\text{P}(\mu\text{-NTer})_2] \cdot \text{EtCHO}$  (solvent signals indicated by asterisks).

$^1\text{H}$  NMR spectrum

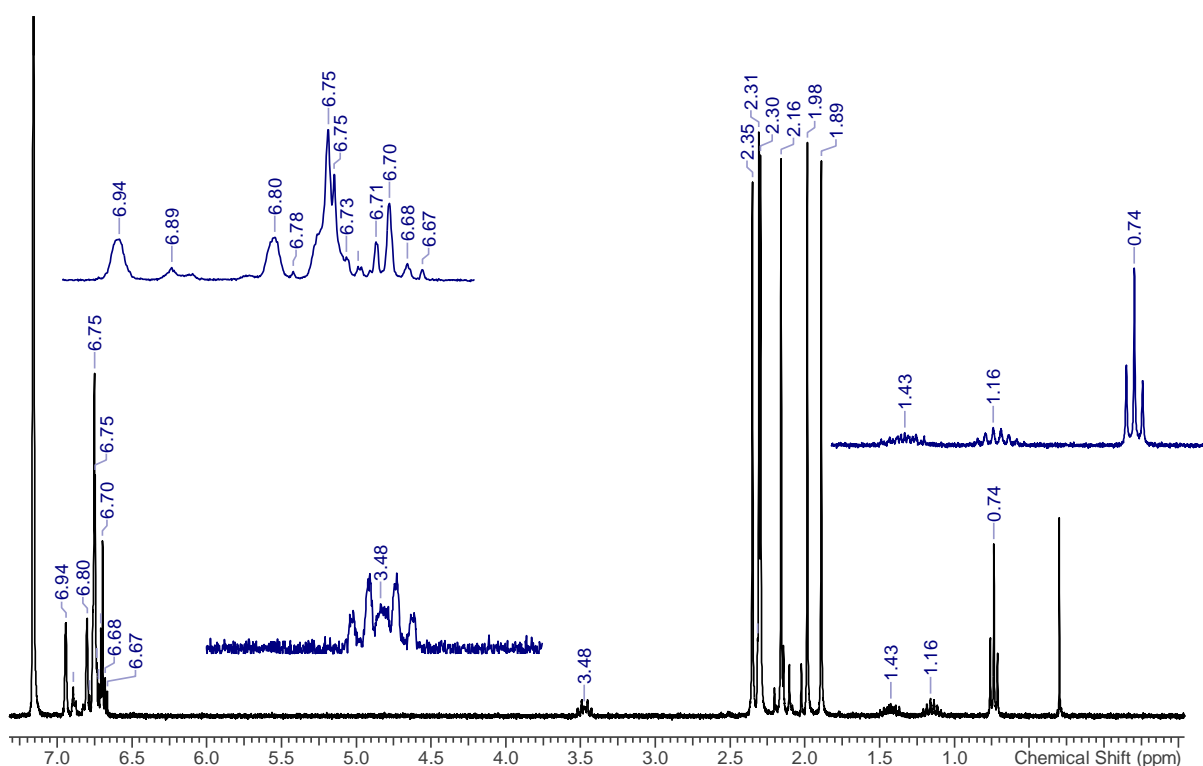

Figure S4 continued.

$^{13}\text{C}$  NMR spectrum

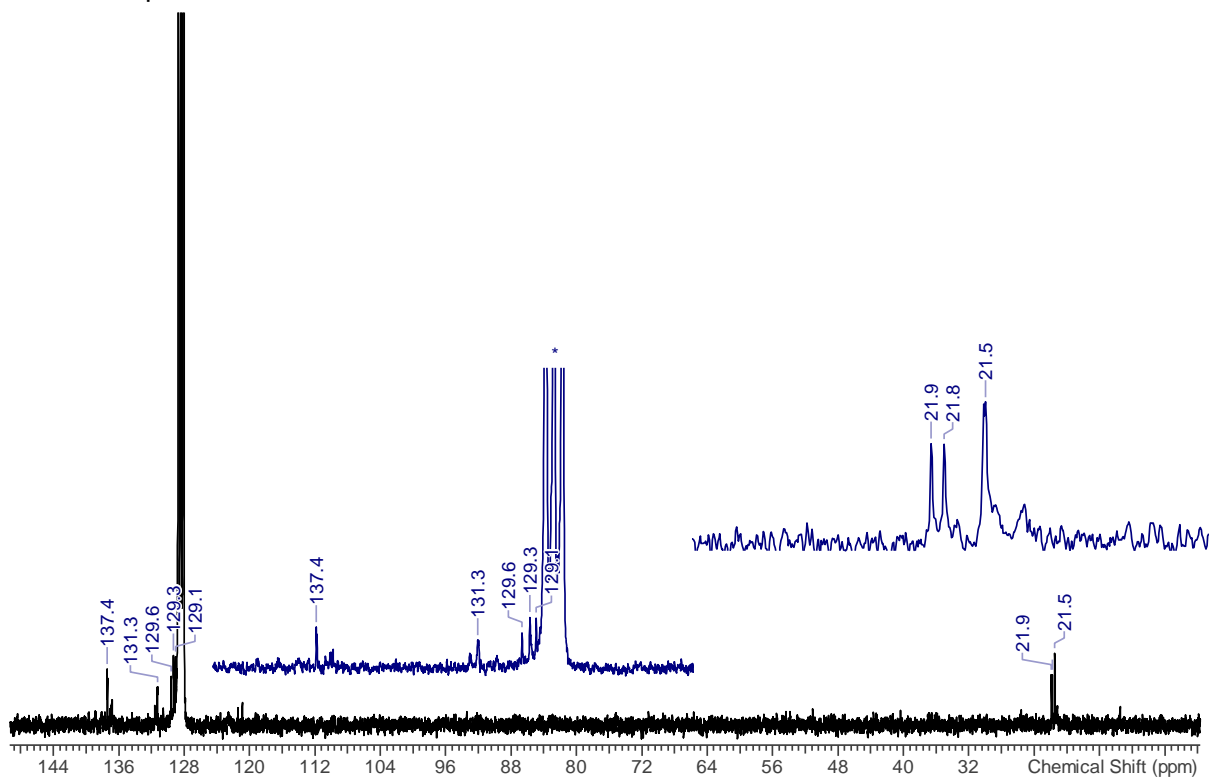

$^{31}\text{P}$  NMR spectrum

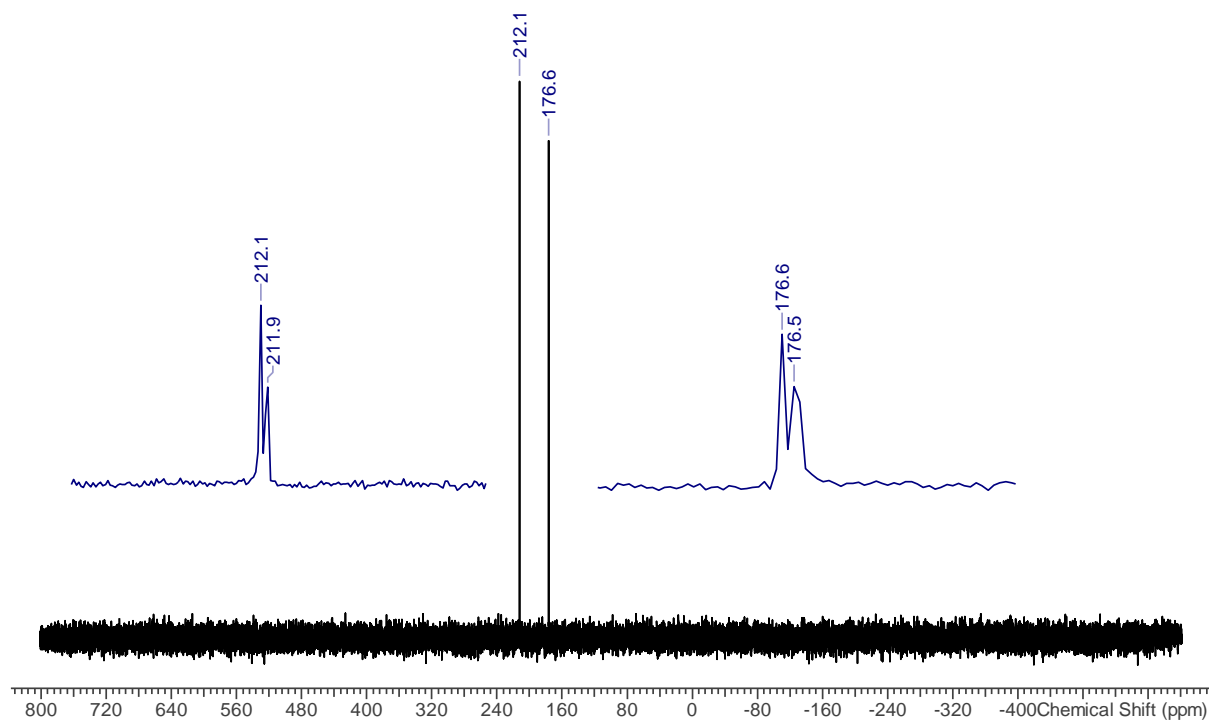

Figure S4 continued.

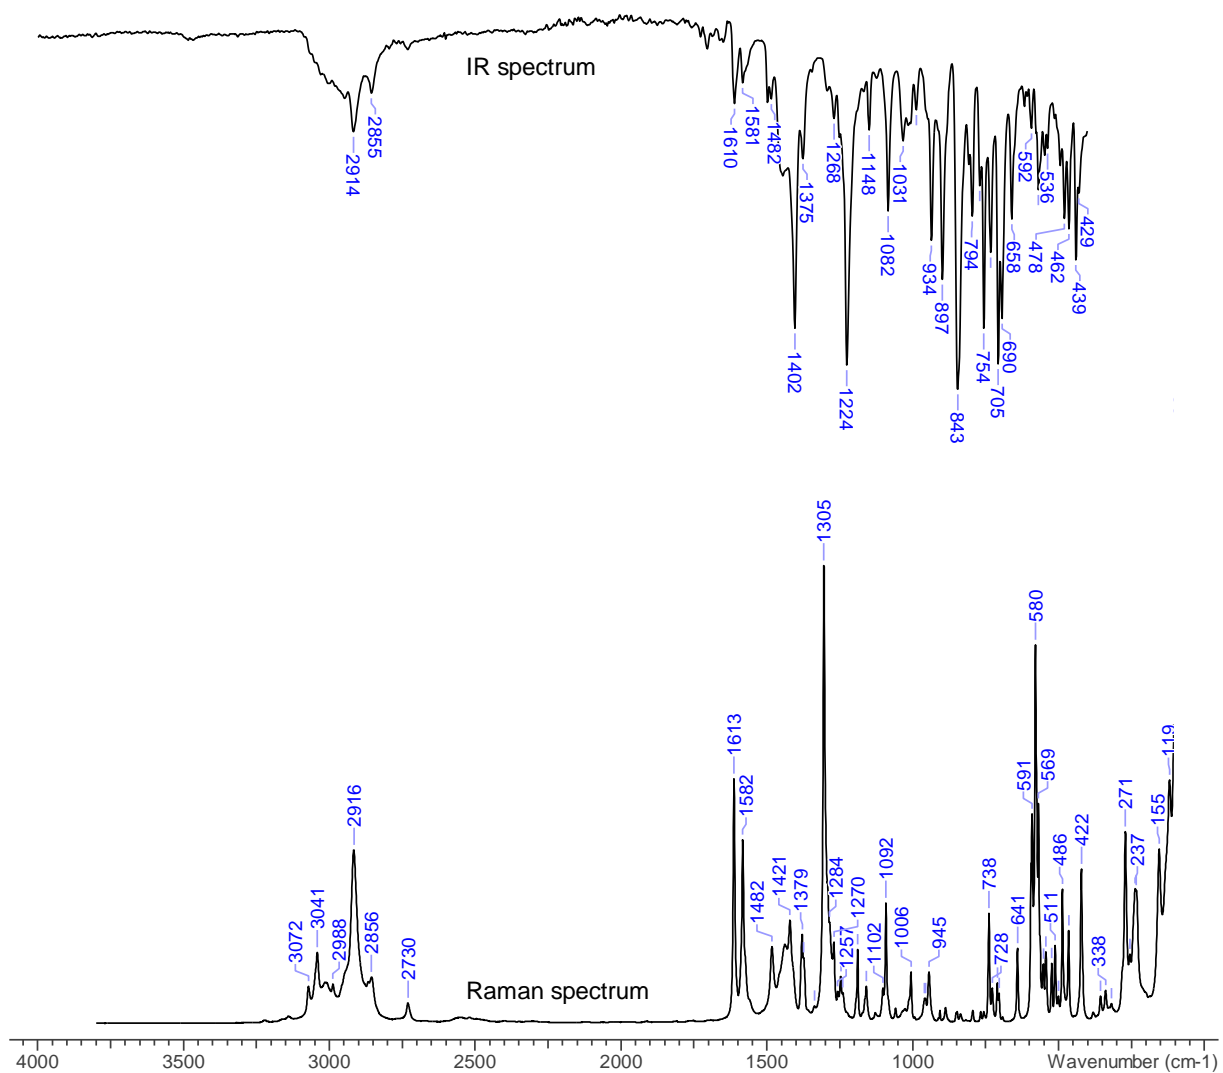



### 3.5 [TerNP]<sub>2</sub>·PhCHO·KOtBu (6)

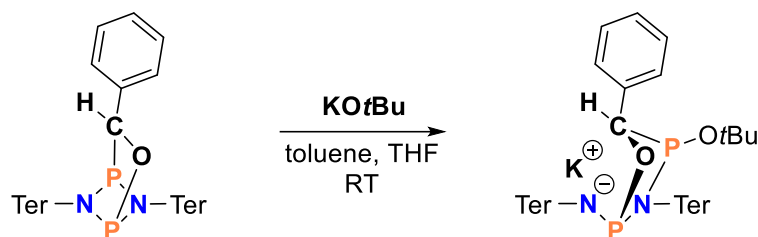

KOtBu (27 mg, 0.24 mmol) is added to a solution of [P( $\mu$ -Nter)]<sub>2</sub>·PhCHO (200 mg, 0.24 mmol) in toluene (10 mL) at RT. For solubility a few drops of THF are added. The reaction mixture is stirred overnight, its colour starting to change from orange to light orange after about 30 minutes. After the reaction, all volatile components are removed *in vacuo* ( $1 \times 10^{-3}$  mbar) at 50 °C (water bath). The residue is dissolved in fresh toluene and insoluble solids are removed by filtration over celite. The clear solution is concentrated *in vacuo* ( $1 \times 10^{-3}$  mbar) to incipient crystallization and stored until crystallization. After removal of the supernatant brownish crystals remain. **Yield:** 176 mg (0.188 mmol, 78 %).

**Mp.** 137-145°C **CHN** calcd. (found) in %: C 75.85 (75.39), H 6.91 (7.11), N 3.00 (2.74). **<sup>31</sup>P{<sup>1</sup>H} NMR** (toluene-*d*<sub>8</sub>, 202.5 MHz):  $\delta$  = 148.6 (s, 1 P, P-CH), 183.9 (s, 1 P, P-O). **<sup>1</sup>H NMR** (toluene-*d*<sub>8</sub>, 500.2 MHz):  $\delta$  = 0.84 (d, <sup>4</sup>*J* (<sup>1</sup>H, <sup>31</sup>P) = 0.6 Hz, 9 H, OC(CH<sub>3</sub>)<sub>3</sub>), 1.77 (s, 3 H, *o/p*-CH<sub>3</sub>), 2.04-2.35 (24 H, *o/p*-CH<sub>3</sub>), 2.38 (s, 6 H, *o/p*-CH<sub>3</sub>), 2.45 (s, 3 H, *o/p*-CH<sub>3</sub>), 6.15 (d, <sup>2</sup>*J* (<sup>1</sup>H, <sup>31</sup>P) = 4.3 Hz, 1H, OCHPh), 6.37 (s, 1H, H (arom.)), 6.51-7.14 (17 H (arom.)). **<sup>13</sup>C{<sup>1</sup>H} NMR** (toluene-*d*<sub>8</sub>, 125.8 MHz):  $\delta$  = 21.2 (s, *p/o*-CH<sub>3</sub>), 21.3 (s, *p/o*-CH<sub>3</sub>), 21.5 (s, *p/o*-CH<sub>3</sub>), 22.0 (s, *p/o*-CH<sub>3</sub>), 30.9 (s), 31.0 (s), 75.3 (d, *J* = 12.4 Hz), 113.7 (s), 125.6 (s), 126.8 (s), 127.7 (s), 128.1 (s, CH), 128.2 (s), 129.8 (*J* = 9.6 Hz), 131.1 (s), 136.5 (s), 136.9 (s), 138.6 (s), 139.5 (s), 140.2 (s), 142.1 (s). **IR** (ATR, 32 scans, cm<sup>-1</sup>):  $\tilde{\nu}$  = 2968 (m), 2914 (m), 2855 (w), 1610 (w), 1579 (w), 1443 (s), 1404 (s), 1377 (m), 1224 (s), 1181 (m), 1146 (m), 1082 (m), 1031 (m), 1014 (m), 932 (s), 897 (s), 845 (vs), 794 (s), 754 (s), 730 (s), 703 (vs), 693 (vs), 658 (m), 567 (m), 478 (s), 462 (s), 439 (s). **Raman** (633 nm, 15 s, 20 scans, cm<sup>-1</sup>):  $\tilde{\nu}$  = 3068 (3), 3046 (3), 3006 (3), 2916 (4), 2854 (3), 2730 (3), 1611 (5), 1603 (5), 1580 (4), 1481 (3), 1436 (3), 1419 (3), 1376 (3), 1302 (7), 1283 (4), 1208 (4), 1186 (3),

1157 (3), 1146 (3), 1089 (3), 1029 (3), 1002 (6), 943 (3), 843 (2), 786 (2), 734 (2), 725 (2), 703 (2), 657 (3), 619 (3), 614 (3), 589 (3), 578 (7), 566 (4), 521 (3), 509 (2), 460 (2), 419 (2), 324 (2), 282 (2), 267 (3), 235 (3), 218 (3), 152 (3). **MS** (CI, pos., isobutane)  $m/z$ : 823  $[(\text{TerNP})_2\text{PhCHOH}]^+$ , 716  $[(\text{TerNP})_2]^+$ , 687, 540, 506, 484, 432  $[\text{TerNPOtBuH}]^+$ , 418  $[\text{TerNCHPhH}]^+$ , 330  $[\text{TerNH}_3]^+$ , 107  $[\text{PhCHOH}]^+$ .

Single crystals suitable for X-ray diffraction can be grown from saturated toluene solution at ambient temperature.

**Figure S5:** NMR, IR and Raman spectra of  $[(\text{TerNP})_2\text{PhCHO}] \cdot \text{KOTu}$  (solvent signals indicated by asterisks).

$^1\text{H}$  NMR spectrum

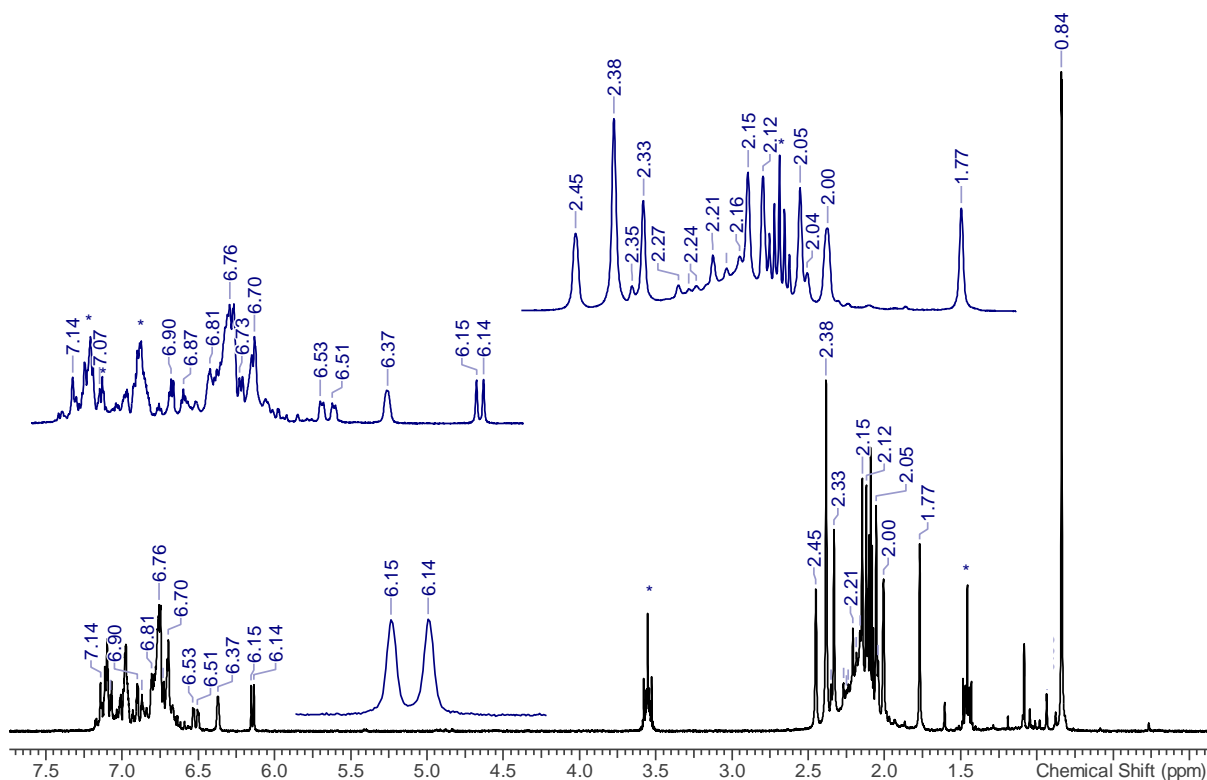

Figure S5 continued.

$^{13}\text{C}$  NMR spectrum

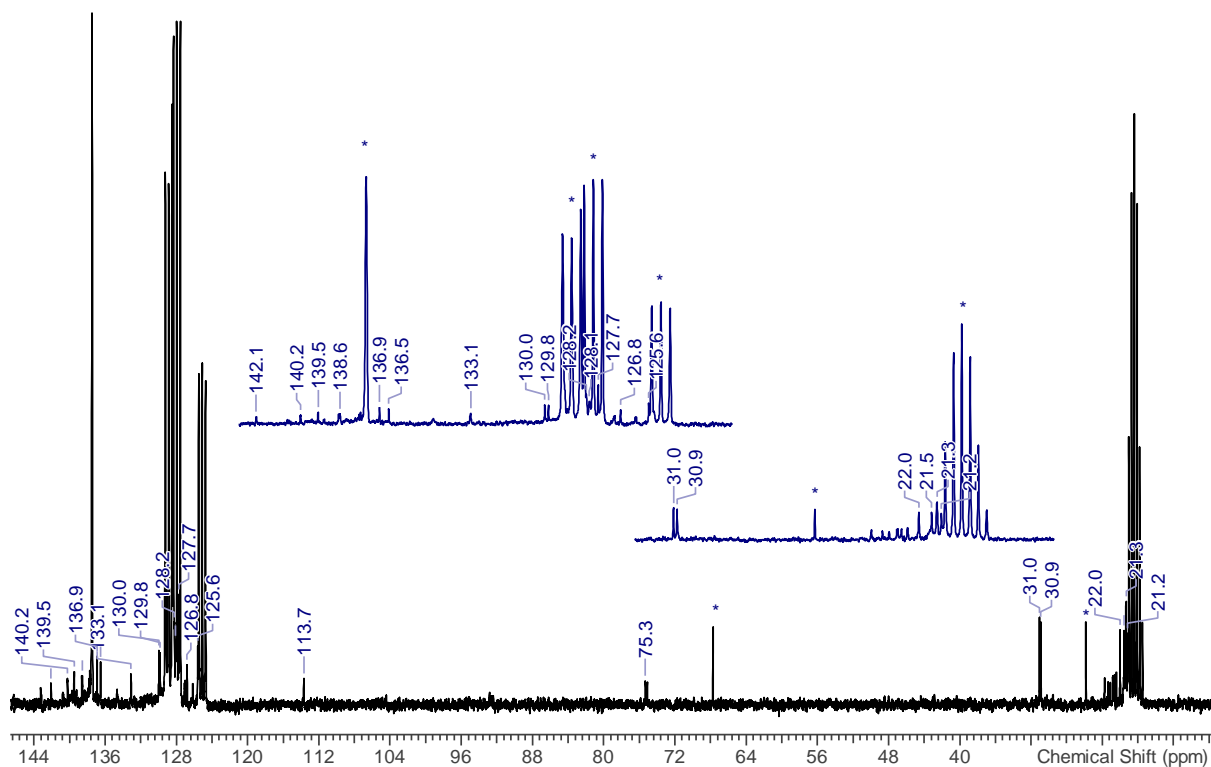

$^{31}\text{P}$  NMR spectrum

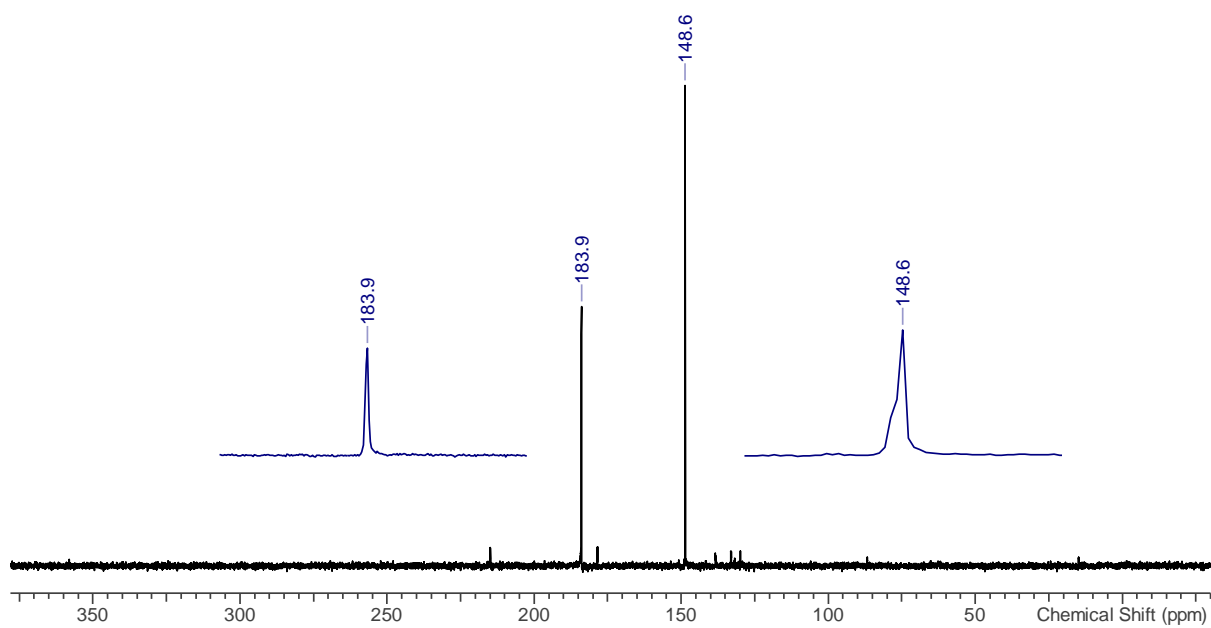

Figure S5 continued.

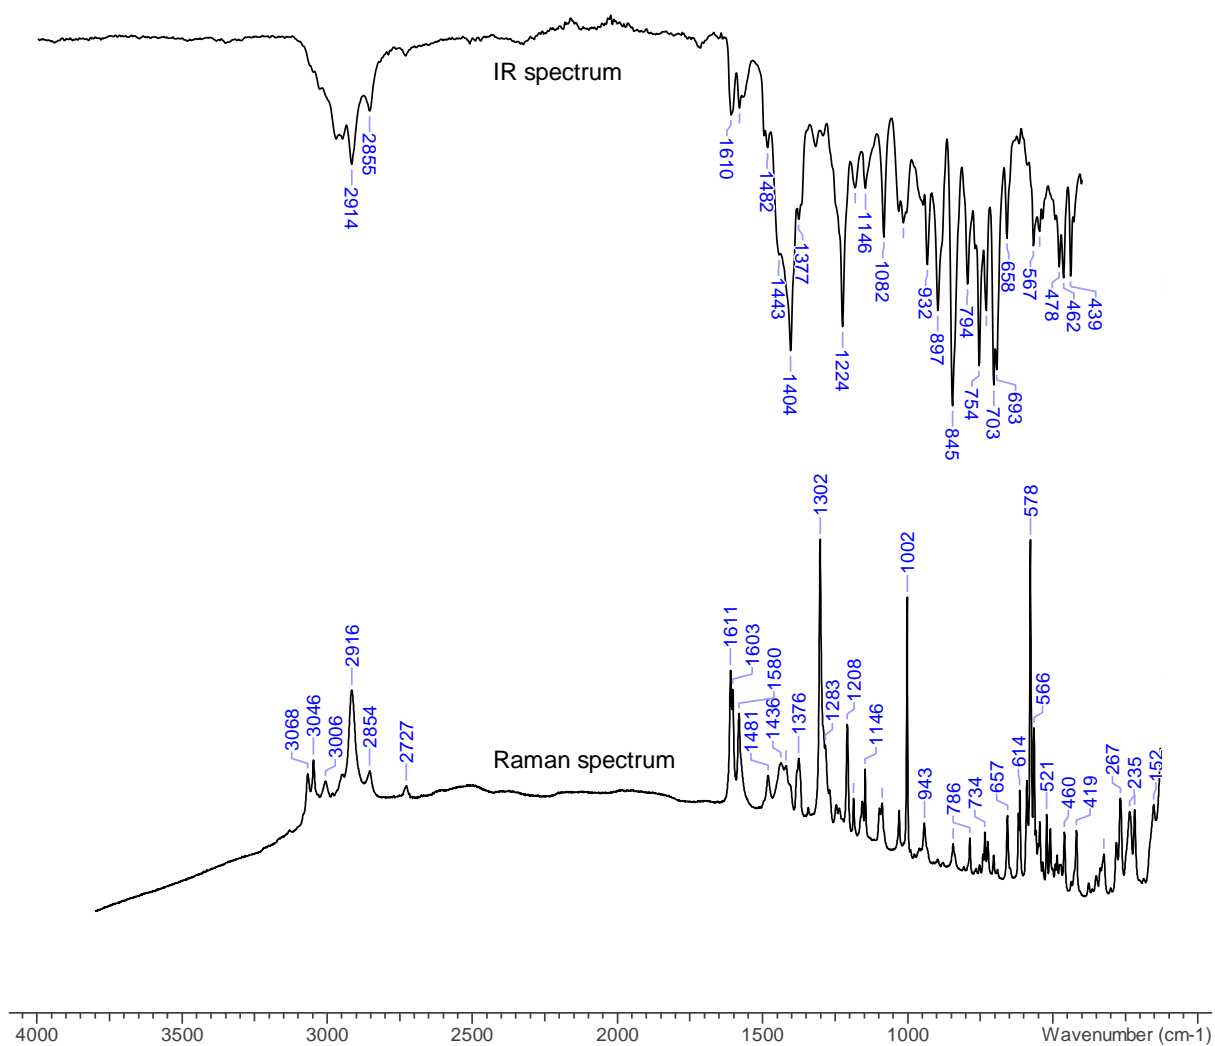

## 4 Additional spectroscopic details

### 4.1 NMR data of compounds 2-5

In the following section, a summary of experimental NMR data of the compounds **2-5** can be found.

**Table S5:**  $^1\text{H}$  and  $^{31}\text{P}$  NMR data of **2-5** (solvent toluene-*d*<sub>8</sub>).

|                                                                        | <b>2</b> | <b>3</b> | <b>4</b> | <b>5</b> |
|------------------------------------------------------------------------|----------|----------|----------|----------|
| $^1\text{H}$ NMR shift<br>(CHO)<br>[ppm]                               | 4.86     | 4.76     | 4.74     | 3.40     |
| coupling constant<br>(CHO)<br>$^2J(^1\text{H}, ^{31}\text{P})$<br>[Hz] | 11.3     | 10.7     | 11.3     | m        |
| $^{31}\text{P}$ NMR shift<br>(P-CH)<br>[ppm]                           | 178.5    | 180.1    | 178.4    | 176.4    |
| $^{31}\text{P}$ NMR shift<br>(P-O)<br>[ppm]                            | 214.9    | 216.6    | 215.5    | 211.9    |

## 5 Computational details

### 5.1 General remarks

Computations were carried out using Gaussian09,<sup>6</sup> ORCA 5.0.3,<sup>7-9</sup> as well as NBO 6.0.<sup>10-13</sup>

**DFT structure optimizations** using analytic gradients employed the pure exchange-correlation functional PBE<sup>14,15</sup> or the hybrid exchange-correlation functional B3LYP<sup>16-21</sup> (using VWN5<sup>16</sup> for the local correlation term) in conjunction with Grimme's dispersion correction D3(BJ)<sup>22,23</sup> and the def2-TZVP basis set<sup>24</sup> (notation PBE-D3/def2-TZVP or B3LYP-D3/def2-TZVP). The resolution-of-identity (RI) approximation was applied, using Weigend's accurate Coulomb-fitting basis set (W06 or def2/J).<sup>25</sup> Numerical integration of the exchange-correlation energy was done on Gaussian's "ultrafine" grid or ORCA's default XC grid ("DefGrid2"). The exact exchange term of the hybrid functional B3LYP was approximated by the Chain Of Spheres approximation (COSX),<sup>26</sup> using the default COSX grid ("DefGrid2") for numerical integration. All structures were fully optimized and confirmed as minima or transition states by analytic frequency analyses.

**Accurate electronic energies** for the optimized structures were computed using single-point DLPNO-CCSD(T)<sup>27-30</sup> calculations employing the def2-TZVP basis set and def2-TZVP/C correlation fitting basis<sup>31</sup> (notation: DLPNO-CCSD(T)/def2-TZVP//PBE-D3/def2-TZVP or DLPNO-CCSD(T)/def2-TZVP//B3LYP-D3/def2-TZVP). For all model systems, the "TightPNO" thresholds were applied in the DLPNO approximation (default "NormalPNO" settings otherwise). Thermodynamic quantities at this level of theory were calculated using the DLPNO-CCSD(T) single point energy and the thermal corrections at the PBE-D3/def2-TZVP or B3LYP-D3/def2-TZVP level of theory, respectively. The  $T_1$  diagnostic was evaluated in each case to ensure reliable results (empirically, CCSD(T) results are considered reliable if  $T_1 < 0.02$ ).<sup>32,33</sup>

**Ab-initio structure optimizations** were performed using ORCA at the CCSD(T)<sup>34-39</sup>/def2-TZVP level of theory using numerical gradients. All structures were fully optimized and confirmed as minima or transition states by numerical frequency analyses. The  $T_1$  diagnostic was evaluated in each case to assess the multireference character of the wavefunction and verify that the single-reference coupled-cluster approach is viable. Improved electronic energies were computed at the DLPNO-CCSD(T)/def2-QZVPP<sup>24</sup> level of theory (using the appropriate def2-QZVPP/C correlation fitting basis<sup>31</sup> and "TightPNO" thresholds as well as the RIJCOSX approximation for the Coulomb and exchange integrals; notation: DLPNO-CCSD(T)/def2-QZVPP// CCSD(T)/def2-TZVP).

**Reaction paths** were investigated using a combination of relaxed potential energy surface scans, the nudged elastic band (NEB) method,<sup>40-45</sup> as well as transition state searches using the eigenvector-following method.<sup>46-49</sup>

Please note that all computations were carried out for single, isolated molecules in the gas phase (ideal gas approximation). There may well be significant differences between gas phase and condensed phase.

## 5.2 Summary of calculated data

**Table S6.** Summary of calculated data (structures optimized at PBE-D3/def2-TZVP, single point energies at DLPNO-CCSD(T)/def2-TZVP). All energies given in atomic units.

| Compd.                                | PG             | $N_{\text{imag}}$ | PBE-D3           |        |                  |                  | DLPNO-CCSD(T)        |       |
|---------------------------------------|----------------|-------------------|------------------|--------|------------------|------------------|----------------------|-------|
|                                       |                |                   | $E_{\text{tot}}$ | ZPE    | $\Delta H^{[a]}$ | $\Delta G^{[b]}$ | $E_{\text{CCSD(T)}}$ | $T_1$ |
| PhCHO                                 | $C_s$          | 0                 | -345.2874        | 0.1064 | 0.1138           | 0.0757           | -344.9510            | 0.013 |
| $C_6H_4NO_2CHO$                       | $C_s$          | 0                 | -549.7013        | 0.1085 | 0.1186           | 0.0732           | -549.1853            | 0.015 |
| $C_6H_4ClCHO$                         | $C_s$          | 0                 | -804.7246        | 0.0972 | 0.1058           | 0.0642           | -804.0788            | 0.012 |
| EtCHO                                 | $C_1$          | 0                 | -192.9814        | 0.0817 | 0.0878           | 0.0540           | -192.8117            | 0.013 |
| $[P(\mu\text{-Nter})]_2$ ( <b>1</b> ) | $D_2$          | 0                 | -2649.5088       | 0.8217 | 0.8776           | 0.7310           | -2646.8693           | 0.010 |
| <b>2</b>                              | $C_1$          | 0                 | -2994.8492       | 0.9329 | 0.9946           | 0.8365           | -2991.8779           | 0.010 |
| <b>3</b>                              | $C_1$          | 0                 | -3199.2697       | 0.9353 | 0.9996           | 0.8354           | -3196.1170           | 0.011 |
| <b>4</b>                              | $C_1$          | 0                 | -3454.2873       | 0.9238 | 0.9867           | 0.8254           | -3451.0073           | 0.010 |
| <b>5</b>                              | $C_1$          | 0                 | -2842.5482       | 0.9088 | 0.9687           | 0.8149           | -2839.7414           | 0.010 |
| <b>6</b>                              | $C_1$          | 0                 | -3827.5205       | 1.0528 | 1.1249           | 0.9594           |                      |       |
| $H_2$                                 | $D_{\infty h}$ | 0                 | -1.1661          | 0.0098 | 0.0131           | -0.0017          | -1.1683              | 0.006 |
| $HC\equiv CH$                         | $D_{\infty h}$ | 0                 | -77.2526         | 0.0259 | 0.0298           | 0.0069           | -77.1837             | 0.013 |
| $H_2C=CH_2$                           | $D_{2h}$       | 0                 | -78.5029         | 0.0496 | 0.0536           | 0.0287           | -78.4290             | 0.011 |
| $H_2C=O$                              | $C_{2v}$       | 0                 | -114.4206        | 0.0256 | 0.0294           | 0.0046           | -114.3314            | 0.016 |
| $[P(\mu\text{-NH})]_2$ ( <b>1H</b> )  | $D_{2h}$       | 0                 | -793.0526        | 0.0322 | 0.0378           | 0.0057           | -792.3371            | 0.012 |
| <b>1H</b> ... $H_2$ vdW               | $C_{2v}$       | 0                 | -794.2236        | 0.0454 | 0.0528           | 0.0167           | -793.5069            | 0.012 |
| <b>1H</b> ... $H_2$ TS                | $C_{2v}$       | 1                 | -794.2132        | 0.0460 | 0.0513           | 0.0192           | -793.4867            | 0.016 |
| <b>1H</b> · $H_2$                     | $C_{2v}$       | 0                 | -794.2368        | 0.0490 | 0.0547           | 0.0218           | -793.5255            | 0.014 |
| <b>1H</b> ... $HC\equiv CH$ vdW       | $C_s$          | 0                 | -870.3124        | 0.0591 | 0.0688           | 0.0259           | -869.5237            | 0.012 |
| <b>1H</b> ... $HC\equiv CH$ TS        | $C_{2v}$       | 1                 | -870.3123        | 0.0589 | 0.0678           | 0.0269           | -869.5209            | 0.012 |
| <b>1H</b> · $HC\equiv CH$             | $C_{2v}$       | 0                 | -870.3728        | 0.0640 | 0.0706           | 0.0355           | -869.5832            | 0.015 |
| <b>1H</b> ... $H_2C=CH_2$ vdW         |                |                   | — <sup>[c]</sup> |        |                  |                  |                      |       |
| <b>1H</b> ... $H_2C=CH_2$ TS          |                |                   | — <sup>[c]</sup> |        |                  |                  |                      |       |
| <b>1H</b> · $H_2C=CH_2$               | $C_{2v}$       | 0                 | -871.6142        | 0.0868 | 0.0938           | 0.0578           | -870.8232            | 0.014 |
| <b>1H</b> ... $H_2C=O$ vdW            |                |                   | — <sup>[c]</sup> |        |                  |                  |                      |       |
| <b>1H</b> ... $H_2C=O$ TS             |                |                   | — <sup>[c]</sup> |        |                  |                  |                      |       |
| <b>1H</b> · $H_2C=O$                  | $C_s$          | 0                 | -907.5414        | 0.0641 | 0.0706           | 0.0348           | -906.7369            | 0.015 |

[a] Thermal correction to enthalpy (298 K); [b] thermal correction to Gibbs energy (298 K, 1 atm); [c] no stationary point found.



**Table S7.** Summary of calculated data (structures optimized at B3LYP-D3/def2-TZVP, single point energies at DLPNO-CCSD(T)/def2-TZVP). All energies given in atomic units.

| Compd.                                             | PG             | B3LYP-D3          |                  |        |                  |                  | DLPNO-CCSD(T)        |       |
|----------------------------------------------------|----------------|-------------------|------------------|--------|------------------|------------------|----------------------|-------|
|                                                    |                | $N_{\text{imag}}$ | $E_{\text{tot}}$ | ZPE    | $\Delta H^{[a]}$ | $\Delta G^{[b]}$ | $E_{\text{CCSD(T)}}$ | $T_1$ |
| PhCHO                                              | $C_s$          | 0                 | -345.52597       | 0.1095 | 0.1168           | 0.0790           | -344.9510            | 0.013 |
| $[\text{P}(\mu\text{-Nter})]_2$ ( <b>1</b> )       | $D_2$          | 0                 | -2651.1473       | 0.8454 | 0.8997           | 0.7689           | -2646.8688           | 0.010 |
| <b>1</b> ...OC(H)Ph vdW                            | $C_1$          | 0                 | -2996.6875       | 0.9585 | 1.0196           | 0.8751           | -2991.8263           | 0.011 |
| <b>2</b>                                           | $C_1$          | 0                 | -2996.7298       | 0.9609 | 1.0205           | 0.8796           | -2991.8770           | 0.010 |
| $\text{H}_2$                                       | $D_{\infty h}$ | 0                 | -1.1732          | 0.0101 | 0.0134           | -0.0014          | -1.1683              | 0.006 |
| $\text{HC}\equiv\text{CH}$                         | $D_{\infty h}$ | 0                 | -77.3157         | 0.0268 | 0.0306           | 0.0078           | -77.1835             | 0.013 |
| $\text{H}_2\text{C}=\text{CH}_2$                   | $D_{2h}$       | 0                 | -78.5697         | 0.0509 | 0.0549           | 0.0301           | -78.4289             | 0.011 |
| $\text{H}_2\text{C}=\text{O}$                      | $C_{2v}$       | 0                 | -114.4969        | 0.0265 | 0.0303           | 0.0055           | -114.3315            | 0.015 |
| $[\text{P}(\mu\text{-NH})]_2$ ( <b>1H</b> )        | $D_{2h}$       | 0                 | -793.3473        | 0.0333 | 0.0386           | 0.0071           | -792.3372            | 0.012 |
| <b>1H</b> ... $\text{H}_2$ vdW                     | $C_{2v}$       | 0                 | -794.5242        | 0.0469 | 0.0540           | 0.0188           | -793.5071            | 0.012 |
| <b>1H</b> ... $\text{H}_2$ TS                      | $C_{2v}$       | 1                 | -794.5068        | 0.0469 | 0.0521           | 0.0202           | -793.4869            | 0.016 |
| <b>1H</b> · $\text{H}_2$                           | $C_{2v}$       | 0                 | -794.5426        | 0.0504 | 0.0561           | 0.0231           | -793.5261            | 0.013 |
| <b>1H</b> ... $\text{HC}\equiv\text{CH}$ vdW       | $C_s$          | 0                 | -870.6693        | 0.0611 | 0.0706           | 0.0280           | -869.5244            | 0.012 |
| <b>1H</b> ... $\text{HC}\equiv\text{CH}$ TS        | $C_{2v}$       | 1                 | -870.6660        | 0.0615 | 0.0694           | 0.0311           | -869.5183            | 0.013 |
| <b>1H</b> · $\text{HC}\equiv\text{CH}$             | $C_{2v}$       | 0                 | -870.7238        | 0.0660 | 0.0724           | 0.0376           | -869.5833            | 0.014 |
| <b>1H</b> ... $\text{H}_2\text{C}=\text{CH}_2$ vdW | $C_{2v}$       | 0                 | -871.9250        | 0.0860 | 0.0954           | 0.0536           | -870.7702            | 0.011 |
| <b>1H</b> ... $\text{H}_2\text{C}=\text{CH}_2$ TS  | $C_{2v}$       | 1                 | -871.9242        | 0.0864 | 0.0944           | 0.0559           | -870.7679            | 0.012 |
| <b>1H</b> · $\text{H}_2\text{C}=\text{CH}_2$       | $C_{2v}$       | 0                 | -871.9697        | 0.0893 | 0.0961           | 0.0605           | -870.8235            | 0.013 |
| <b>1H</b> ... $\text{H}_2\text{C}=\text{O}$ vdW    |                |                   | — <sup>[c]</sup> |        |                  |                  |                      |       |
| <b>1H</b> ... $\text{H}_2\text{C}=\text{O}$ TS     |                |                   | — <sup>[c]</sup> |        |                  |                  |                      |       |
| <b>1H</b> · $\text{H}_2\text{C}=\text{O}$          | $C_s$          | 0                 | -907.9089        | 0.0661 | 0.0725           | 0.0370           | -906.7375            | 0.015 |

[a] Thermal correction to enthalpy (298 K); [b] thermal correction to Gibbs energy (298 K, 1 atm); [c] no stationary point found.

**Table S8.** Summary of calculated data (structures optimized at CCSD(T)/def2-TZVP, single point energies at DLPNO-CCSD(T)/def2-QZVPP). All energies given in atomic units ( $E_h$ ).

| Compd.                                          | PG             | CCSD(T)           |                  |        |                  |                  | DLPNO-CCSD(T) |       |
|-------------------------------------------------|----------------|-------------------|------------------|--------|------------------|------------------|---------------|-------|
|                                                 |                | $N_{\text{imag}}$ | $E_{\text{tot}}$ | ZPE    | $\Delta H^{[a]}$ | $\Delta G^{[b]}$ |               |       |
| H <sub>2</sub>                                  | $D_{\infty h}$ | 0                 | -1.1683          | 0.0101 | 0.0134           | -0.0014          | -1.1740       | 0.006 |
| HC≡CH                                           | $D_{\infty h}$ | 0                 | -77.1843         | 0.0262 | 0.0301           | 0.0072           | -77.2089      | 0.014 |
| H <sub>2</sub> C=CH <sub>2</sub>                | $D_{2h}$       | 0                 | -78.4294         | 0.0507 | 0.0547           | 0.0298           | -78.4618      | 0.011 |
| H <sub>2</sub> C=O                              | $C_{2v}$       | 0                 | -114.3322        | 0.0266 | 0.0304           | 0.0056           | -114.3690     | 0.015 |
| [P( $\mu$ -NH)] <sub>2</sub> ( <b>1H</b> )      | $D_{2h}$       | 0                 | -792.3391        | 0.0332 | 0.0386           | 0.0069           | -792.4225     | 0.012 |
| <b>1H</b> ⋯H <sub>2</sub> vdW                   | $C_{2v}$       | 0                 | -793.5095        | 0.0461 | 0.0538           | 0.0171           | -793.5996     | 0.012 |
| <b>1H</b> ⋯H <sub>2</sub> TS                    | $C_{2v}$       | 1                 | -793.4888        | 0.0474 | 0.0525           | 0.0206           | -793.5819     | 0.016 |
| <b>1H</b> · H <sub>2</sub>                      | $C_{2v}$       | 0                 | -793.5273        | 0.0509 | 0.0566           | 0.0238           | -793.6211     | 0.014 |
| <b>1H</b> ⋯HC≡CH vdW                            | $C_s$          | 0                 | -869.5277        | 0.0603 | 0.0700           | 0.0267           | -869.6357     | 0.012 |
| <b>1H</b> ⋯HC≡CH TS                             | $C_{2v}$       | 1                 | -869.5214        | 0.0612 | 0.0691           | 0.0308           | -869.6294     | 0.013 |
| <b>1H</b> · HC≡CH                               | $C_{2v}$       | 0                 | -869.5862        | 0.0660 | 0.0723           | 0.0376           | -869.6965     | 0.014 |
| <b>1H</b> ⋯H <sub>2</sub> C=CH <sub>2</sub> vdW | $C_{2v}$       | — <sup>[c]</sup>  | -870.7735        |        | — <sup>[c]</sup> |                  | -870.8893     | 0.011 |
| <b>1H</b> ⋯H <sub>2</sub> C=CH <sub>2</sub> TS  | $C_{2v}$       | — <sup>[c]</sup>  | -870.7709        |        | — <sup>[c]</sup> |                  | -870.8871     | 0.012 |
| <b>1H</b> · H <sub>2</sub> C=CH <sub>2</sub>    | $C_{2v}$       | — <sup>[c]</sup>  | -870.8257        |        | — <sup>[c]</sup> |                  | -870.9448     | 0.013 |
| <b>1H</b> ⋯H <sub>2</sub> C=O vdW               | $C_s$          | 0                 | -906.6785        | 0.0621 | 0.0712           | 0.0294           | -906.7987     | 0.016 |
| <b>1H</b> ⋯H <sub>2</sub> C=O TS                | $C_s$          | 1                 | -906.6780        | 0.0626 | 0.0703           | 0.0315           | -906.7986     | 0.018 |
| <b>1H</b> · H <sub>2</sub> C=O                  | $C_s$          | 0                 | -906.7400        | 0.0664 | 0.0727           | 0.0373           | -906.8638     | 0.014 |

[a] Thermal correction to enthalpy (298 K); [b] thermal correction to Gibbs energy (298 K, 1 atm); [c] no frequency calculation performed due to system size.

**Table S9.** Computed reaction energies in kJ/mol ( $\Delta H$ ,  $\Delta G^\circ$  at 298.15 K,  $c^\circ = 1$  mol/L).

| Reaction                                                                                    |       | DLPNO-CCSD(T)//PBE-D3 <sup>[a]</sup> |                  |                  | DLPNO-CCSD(T)//B3LYP <sup>[b]</sup> |                  |                  | CCSD(T) <sup>[c]</sup> |                       |                       | DLPNO-CCSD(T)//CCSD(T) <sup>[d]</sup> |                       |                       |
|---------------------------------------------------------------------------------------------|-------|--------------------------------------|------------------|------------------|-------------------------------------|------------------|------------------|------------------------|-----------------------|-----------------------|---------------------------------------|-----------------------|-----------------------|
|                                                                                             |       | $\Delta U_0$                         | $\Delta H$       | $\Delta G^\circ$ | $\Delta U_0$                        | $\Delta H$       | $\Delta G^\circ$ | $\Delta U_0$           | $\Delta H$            | $\Delta G^\circ$      | $\Delta U_0$                          | $\Delta H$            | $\Delta G^\circ$      |
| <b>1</b> + Ph-CHO → <b>2</b>                                                                |       | -138.3                               | -142.7           | -80.7            | -134.7                              | -139.7           | -75.1            |                        |                       |                       |                                       |                       |                       |
| <b>1</b> + O <sub>2</sub> N-C <sub>6</sub> H <sub>4</sub> -CHO → <b>3</b>                   |       | -150.4                               | -154.9           | -89.8            |                                     |                  |                  |                        |                       |                       |                                       |                       |                       |
| <b>1</b> + Cl-C <sub>6</sub> H <sub>4</sub> -CHO → <b>4</b>                                 |       | -142.4                               | -146.7           | -84.1            |                                     |                  |                  |                        |                       |                       |                                       |                       |                       |
| <b>1</b> + Et-CHO → <b>5</b>                                                                |       | -144.4                               | -149.9           | -88.0            |                                     |                  |                  |                        |                       |                       |                                       |                       |                       |
| <b>1H</b> + H <sub>2</sub> → <b>1H</b> · H <sub>2</sub>                                     | vdW   | 4.5                                  | 0.9              | 21.5             | 5.0                                 | 1.1              | 22.3             | 1.7                    | -0.6                  | 16.9                  | -0.9                                  | -3.2                  | 14.3                  |
|                                                                                             | TS    | 59.3                                 | 49.8             | 81.0             | 58.2                                | 49.1             | 79.0             | 59.4                   | 50.2                  | 80.4                  | 48.9                                  | 39.7                  | 70.0                  |
|                                                                                             | Prod. | -34.9                                | -43.1            | -14.1            | -35.8                               | -43.2            | -16.2            | -32.4                  | -40.3                 | -12.4                 | -44.7                                 | -52.6                 | -24.7                 |
| <b>1H</b> + HC≡CH → <b>1H</b> · HC≡CH                                                       | vdW   | -5.0                                 | -4.3             | 19.6             | -7.2                                | -6.3             | 16.5             | -9.0                   | -7.6                  | 13.9                  | -9.2                                  | -7.8                  | 13.7                  |
|                                                                                             | TS    | 1.8                                  | 0.3              | 29.4             | 9.8                                 | 6.8              | 40.8             | 9.9                    | 6.6                   | 41.2                  | 9.6                                   | 6.3                   | 41.0                  |
|                                                                                             | Prod. | -148.4                               | -155.8           | -111.5           | -149.0                              | -156.0           | -112.8           | -147.8                 | -155.3                | -111.2                | -153.8                                | -161.3                | -117.3                |
| <b>1H</b> + H <sub>2</sub> C=CH <sub>2</sub> → <b>1H</b> · H <sub>2</sub> C=CH <sub>2</sub> | vdW   |                                      | — <sup>[e]</sup> |                  | -6.2                                | -5.9             | 24.5             | -7.6 <sup>[f]</sup>    | -7.5 <sup>[f]</sup>   | 23.4 <sup>[f]</sup>   | -7.9 <sup>[f]</sup>                   | -7.8 <sup>[f]</sup>   | 23.1 <sup>[f]</sup>   |
|                                                                                             | TS    |                                      | — <sup>[e]</sup> |                  | 1.0                                 | -2.5             | 36.5             | 0.3 <sup>[f]</sup>     | -3.3 <sup>[f]</sup>   | 36.1 <sup>[f]</sup>   | -1.3 <sup>[f]</sup>                   | -4.9 <sup>[f]</sup>   | 34.6 <sup>[f]</sup>   |
|                                                                                             | Prod. |                                      | -136.7           | -143.5           | -96.2                               | -137.1           | -143.6           | -97.2                  | -136.1 <sup>[f]</sup> | -142.7 <sup>[f]</sup> | -95.9 <sup>[f]</sup>                  | -145.0 <sup>[f]</sup> | -151.7 <sup>[f]</sup> |
| <b>1H</b> + H <sub>2</sub> C=O → <b>1H</b> · H <sub>2</sub> C=O                             | vdW   |                                      | — <sup>[e]</sup> |                  |                                     | — <sup>[e]</sup> |                  | -12.9                  | -13.2                 | 17.5                  | -13.1                                 | -13.5                 | 17.3                  |
|                                                                                             | TS    |                                      | — <sup>[e]</sup> |                  |                                     | — <sup>[e]</sup> |                  | -10.3                  | -14.1                 | 24.3                  | -11.5                                 | -15.3                 | 23.1                  |
|                                                                                             | Prod. |                                      | -163.4           | -170.8           | -123.2                              | -164.1           | -171.3           | -124.6                 | -163.0                | -170.5                | -123.1                                | -172.6                | -180.1                |

[a] DLPNO-CCSD(T)/def2-TZVP//PBE-D3/def2-TZVP; [b] DLPNO-CCSD(T)/def2-TZVP//B3LYP-D3/def2-TZVP; [c] CCSD(T)/def2-TZVP; [d] DLPNO-CCSD(T)/def2-QZVPP//CCSD(T)/def2-TZVP; [e] no stationary point found; [f] estimated using the thermal correction terms at the B3LYP-D3/def2-TZVP level of theory. Evaluation of the thermal corrections of the other model systems implies that the average error with respect to the thermal corrections computed at the CCSD(T)/def2-TZVP level of theory is below 0.5  $mE_h$  (~1 kJ/mol).

As can be inferred from Table S9, both PBE-D3 and B3LYP-D3 perform equally well in predicting the structures of the reaction products of the model reactions. Thus, the reaction energies including DLPNO-CCSD(T) electronic energies are close to those of the canonical CCSD(T) calculations. However, B3LYP-D3 performs considerably better in predicting the structures of the van-der-Waals (vdW) complexes as well as transition states (TS). Yet, both DFT methods fail to identify the TS of the addition of H<sub>2</sub>C=O, which according to coupled-cluster calculations lies only ~2 kJ/mol higher in energy than the vdW complex ( $\Delta U_0$ ). The reaction barrier ( $\Delta G^\ddagger = 23$  kJ/mol) is therefore of entropic nature.

In the fourth column of Table S9, we included electronic energies calculated at the DLPNO-CCSD(T)/def2-QZVPP level of theory (quadruple-zeta basis) to investigate the basis set truncation error. In most cases, the energies are quite similar to the results at the triple-zeta level, with some notable exceptions: All addition products as well as the TS of the H<sub>2</sub> addition are stabilized by ~10 kJ/mol when using the QZ basis. The energies of the other transition states as well as the vdW complexes, however, remain nearly unaffected by the change in the number of basis functions, indicating that these values are well converged and, in particular, are not compromised by basis set superposition errors (BSSE).

## 5.3 Optimized structures (.xyz-files)

### 5.3.1 PhCHO

```
14
PhCHO @ PBE-D3/def2-TZVP - Cs
C      0.57235      -2.15794      -0.00000
C      1.61832      -1.23165      -0.00000
C      1.33077       0.13251      -0.00000
C     -0.00000       0.57315       0.00000
C     -1.04707      -0.36255       0.00000
C     -0.75944     -1.72301       0.00000
H      0.79403     -3.22660      -0.00000
H      2.65369     -1.57538      -0.00000
H      2.13739       0.87049     -0.00000
H     -2.07413       0.00639       0.00000
H     -1.56980     -2.45368       0.00000
C     -0.28309       2.02482       0.00000
O     -1.39583       2.52201       0.00000
H      0.63438       2.67065       0.00000
```

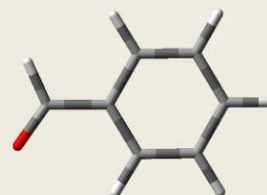

```
14
PhCHO @ B3LYP-D3/def2-TZVP - Cs
C      0.59275      -2.18334       0.00000
C      1.63383      -1.26193       0.00000
C      1.34852       0.09703      -0.00000
C      0.02492       0.53653      -0.00000
C     -1.01764      -0.39428      -0.00000
C     -0.73246     -1.74907      -0.00000
H      0.81176     -3.24365       0.00000
H      2.66083     -1.60319       0.00000
H      2.15124       0.82571     -0.00000
H     -2.03686     -0.03083     -0.00000
H     -1.53738     -2.47272     -0.00000
C     -0.25917       1.98561       0.00000
O     -1.36405       2.47473       0.00000
H      0.64462       2.63065       0.00000
```

### 5.3.2 C<sub>6</sub>H<sub>4</sub>NO<sub>2</sub>CHO

| 16                                   |          |          |          |
|--------------------------------------|----------|----------|----------|
| O2N-C6H4-CHO @ PBE-D3/def2-TZVP - Cs |          |          |          |
| C                                    | -0.00000 | 1.04455  | 0.00000  |
| C                                    | 1.27456  | 0.48221  | 0.00000  |
| C                                    | 1.38064  | -0.90596 | -0.00000 |
| C                                    | 0.22899  | -1.70532 | -0.00000 |
| C                                    | -1.04312 | -1.11029 | -0.00000 |
| C                                    | -1.16437 | 0.27319  | 0.00000  |
| H                                    | 2.14700  | 1.13335  | 0.00000  |
| H                                    | 2.36473  | -1.38074 | -0.00000 |
| H                                    | -1.92226 | -1.75639 | -0.00000 |
| H                                    | -2.13287 | 0.77068  | 0.00000  |
| C                                    | 0.36808  | -3.18336 | -0.00000 |
| O                                    | -0.56573 | -3.96354 | -0.00000 |
| H                                    | 1.42759  | -3.54832 | -0.00000 |
| N                                    | -0.12465 | 2.52590  | 0.00000  |
| O                                    | -1.26169 | 2.99786  | 0.00000  |
| O                                    | 0.91739  | 3.18193  | 0.00000  |

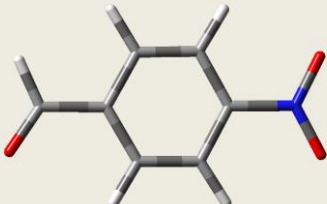

### 5.3.3 C<sub>6</sub>H<sub>4</sub>ClCHO

| 14                                  |          |          |          |
|-------------------------------------|----------|----------|----------|
| Cl-C6H4-CHO @ PBE-D3/def2-TZVP - Cs |          |          |          |
| C                                   | -1.20207 | 0.57727  | 0.00000  |
| C                                   | -1.21492 | -0.82007 | 0.00000  |
| C                                   | -0.00059 | -1.50073 | 0.00000  |
| C                                   | 1.21326  | -0.79985 | -0.00000 |
| C                                   | 1.20281  | 0.60455  | -0.00000 |
| C                                   | 0.00000  | 1.29768  | -0.00000 |
| H                                   | -2.16442 | -1.35433 | 0.00000  |
| H                                   | 0.01094  | -2.59369 | 0.00000  |
| H                                   | 2.15744  | 1.13333  | -0.00000 |
| H                                   | -0.02439 | 2.38713  | -0.00000 |
| C                                   | 2.48828  | -1.54588 | -0.00000 |
| O                                   | 3.59566  | -1.03623 | -0.00000 |
| H                                   | 2.36821  | -2.66094 | -0.00000 |
| Cl                                  | -2.70786 | 1.44120  | 0.00000  |

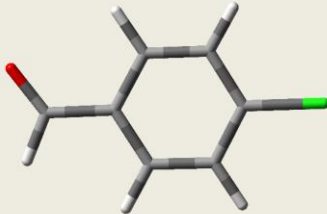

### 5.3.4 EtCHO

| 10                            |          |          |          |
|-------------------------------|----------|----------|----------|
| EtCHO @ PBE-D3/def2-TZVP - C1 |          |          |          |
| C                             | 1.68796  | 0.28603  | -0.17895 |
| C                             | 0.47437  | -0.59422 | 0.14616  |
| H                             | 2.60890  | -0.31139 | -0.19749 |
| H                             | 1.57474  | 0.76665  | -1.16072 |
| H                             | 1.81819  | 1.07897  | 0.57254  |
| H                             | 0.30226  | -1.36344 | -0.61937 |
| H                             | 0.64424  | -1.10565 | 1.11153  |
| C                             | -0.77999 | 0.22698  | 0.30244  |
| O                             | -1.81918 | 0.04378  | -0.29557 |
| H                             | -0.68888 | 1.07184  | 1.04023  |

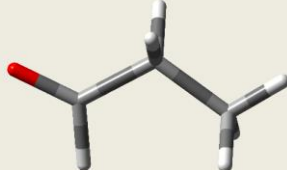

### 5.3.5 [P( $\mu$ -NTer)]<sub>2</sub> (1)

```

102
[P( $\mu$ -NTer)]2 @ PBE-D3/def2-TZVP - D2
N      -0.00000      0.00000      -1.11373
N      -0.00000      0.00000       1.11373
P       1.34195     -0.00000       0.00000
P      -1.34195      0.00000       0.00000
C       0.00000     -0.00000       2.51579
C       1.15163      0.41324       3.22973
C      -1.15163     -0.41324       3.22973
C       1.13077      0.40397       4.62874
C      -1.13077     -0.40397       4.62874
C       0.00000     -0.00000       5.33560
H       2.02606      0.73377       5.15966
H      -2.02606     -0.73377       5.15966
H       0.00000     -0.00000       6.42632
C       0.00000     -0.00000      -2.51579
C       1.15163     -0.41324      -3.22973
C      -1.15163      0.41324      -3.22973
C       1.13077     -0.40397      -4.62874
C      -1.13077      0.40397      -4.62874
C       0.00000     -0.00000      -5.33560
H       2.02606     -0.73377      -5.15966
H      -2.02606      0.73377      -5.15966
H       0.00000     -0.00000      -6.42632
C      -2.38047      0.88753      -2.53313
C      -3.49608      0.03544      -2.39727
C      -2.43121      2.20977      -2.03338
C      -4.64223      0.52090      -1.75802
C      -3.59631      2.65199      -1.40490
C      -4.71164      1.82010      -1.25104
H      -5.50022     -0.14530      -1.63830
H      -3.62928      3.67224      -1.01242
C      -2.38047     -0.88753      -2.53313
C       3.49608     -0.03544      -2.39727
C       2.43121     -2.20977      -2.03338
C       4.64223     -0.52090      -1.75802
C       3.59631     -2.65199      -1.40490
C       4.71164     -1.82010      -1.25104
H       5.50022      0.14530      -1.63830
H       3.62928     -3.67224      -1.01242
C      -2.38047     -0.88753       2.53313
C      -3.49608     -0.03544       2.39727
C      -2.43121     -2.20977       2.03338
C      -4.64223     -0.52090       1.75802
C      -3.59631     -2.65199       1.40490
C      -4.71164     -1.82010       1.25104
H      -5.50022      0.14530       1.63830
H      -3.62928     -3.67224       1.01242
C       2.38047      0.88753       2.53313
C       2.43121      2.20977       2.03338
C       3.49608      0.03544       2.39727
C       3.59631      2.65199       1.40490
C       4.64223      0.52090       1.75802
C       4.71164      1.82010       1.25104
H       3.62928      3.67224       1.01242
H       5.50022     -0.14530       1.63830
C      -3.44308      1.39457       2.86433
H      -4.42258      1.87762       2.75186
H      -3.13262      1.47615       3.91534
H      -2.71204      1.96531       2.26893

```

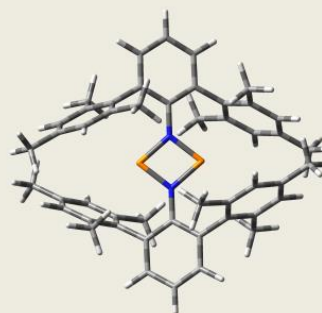

|   |          |          |          |
|---|----------|----------|----------|
| C | -1.23308 | -3.11288 | 2.13905  |
| H | -0.84812 | -3.15778 | 3.16829  |
| H | -1.47900 | -4.13121 | 1.81134  |
| H | -0.40954 | -2.74129 | 1.50731  |
| C | -5.94791 | -2.31721 | 0.55159  |
| H | -5.71638 | -2.65276 | -0.47111 |
| H | -6.38857 | -3.17686 | 1.07962  |
| H | -6.71366 | -1.53261 | 0.48677  |
| C | 3.44308  | -1.39457 | 2.86433  |
| H | 4.42258  | -1.87762 | 2.75186  |
| H | 3.13262  | -1.47615 | 3.91534  |
| H | 2.71204  | -1.96531 | 2.26893  |
| C | 1.23308  | 3.11288  | 2.13905  |
| H | 0.40954  | 2.74129  | 1.50731  |
| H | 0.84812  | 3.15778  | 3.16829  |
| H | 1.47900  | 4.13121  | 1.81134  |
| C | 5.94791  | 2.31721  | 0.55159  |
| H | 5.71638  | 2.65276  | -0.47111 |
| H | 6.38857  | 3.17686  | 1.07962  |
| H | 6.71366  | 1.53261  | 0.48677  |
| C | 5.94791  | -2.31721 | -0.55159 |
| H | 5.71638  | -2.65276 | 0.47111  |
| H | 6.38857  | -3.17686 | -1.07962 |
| H | 6.71366  | -1.53261 | -0.48677 |
| C | -5.94791 | 2.31721  | -0.55159 |
| H | -5.71638 | 2.65276  | 0.47111  |
| H | -6.38857 | 3.17686  | -1.07962 |
| H | -6.71366 | 1.53261  | -0.48677 |
| C | -1.23308 | 3.11288  | -2.13905 |
| H | -0.84812 | 3.15778  | -3.16829 |
| H | -1.47900 | 4.13121  | -1.81134 |
| H | -0.40954 | 2.74129  | -1.50731 |
| C | 1.23308  | -3.11288 | -2.13905 |
| H | 0.84812  | -3.15778 | -3.16829 |
| H | 1.47900  | -4.13121 | -1.81134 |
| H | 0.40954  | -2.74129 | -1.50731 |
| C | 3.44308  | 1.39457  | -2.86433 |
| H | 4.42258  | 1.87762  | -2.75186 |
| H | 3.13262  | 1.47615  | -3.91534 |
| H | 2.71204  | 1.96531  | -2.26893 |
| C | -3.44308 | -1.39457 | -2.86433 |
| H | -4.42258 | -1.87762 | -2.75186 |
| H | -3.13262 | -1.47615 | -3.91534 |
| H | -2.71204 | -1.96531 | -2.26893 |

|                                                                       |          |          |          |
|-----------------------------------------------------------------------|----------|----------|----------|
| 102                                                                   |          |          |          |
| [P( $\mu$ -N <sub>Ter</sub> )] <sub>2</sub> @ B3LYP-D3/def2-TZVP - D2 |          |          |          |
| N                                                                     | -0.00000 | 0.00000  | -1.11290 |
| N                                                                     | -0.00000 | 0.00000  | 1.11290  |
| P                                                                     | 1.32466  | 0.00000  | -0.00000 |
| P                                                                     | -1.32467 | 0.00000  | 0.00000  |
| C                                                                     | -0.00000 | 0.00000  | 2.51855  |
| C                                                                     | 1.14131  | 0.42159  | 3.23091  |
| C                                                                     | -1.14131 | -0.42159 | 3.23091  |
| C                                                                     | 1.12017  | 0.41413  | 4.62316  |
| C                                                                     | -1.12017 | -0.41413 | 4.62316  |
| C                                                                     | -0.00000 | 0.00000  | 5.32734  |
| H                                                                     | 2.00486  | 0.74869  | 5.15045  |
| H                                                                     | -2.00486 | -0.74869 | 5.15045  |
| H                                                                     | -0.00000 | 0.00000  | 6.40949  |
| C                                                                     | -0.00000 | 0.00000  | -2.51855 |
| C                                                                     | 1.14131  | -0.42159 | -3.23091 |



|   |          |          |          |
|---|----------|----------|----------|
| C | -1.14131 | 0.42159  | -3.23091 |
| C | 1.12017  | -0.41413 | -4.62316 |
| C | -1.12017 | 0.41413  | -4.62316 |
| C | -0.00000 | -0.00000 | -5.32734 |
| H | 2.00486  | -0.74869 | -5.15045 |
| H | -2.00487 | 0.74869  | -5.15045 |
| H | -0.00000 | -0.00000 | -6.40949 |
| C | -2.37292 | 0.89765  | -2.54151 |
| C | -3.47232 | 0.04124  | -2.38772 |
| C | -2.42770 | 2.21256  | -2.04626 |
| C | -4.60835 | 0.51312  | -1.73377 |
| C | -3.58036 | 2.64430  | -1.40286 |
| C | -4.67944 | 1.80551  | -1.22992 |
| H | -5.44920 | -0.15580 | -1.59648 |
| H | -3.61625 | 3.65519  | -1.01160 |
| C | 2.37292  | -0.89765 | -2.54151 |
| C | 3.47231  | -0.04124 | -2.38772 |
| C | 2.42770  | -2.21255 | -2.04625 |
| C | 4.60835  | -0.51311 | -1.73377 |
| C | 3.58037  | -2.64429 | -1.40286 |
| C | 4.67944  | -1.80550 | -1.22992 |
| H | 5.44919  | 0.15581  | -1.59648 |
| H | 3.61625  | -3.65518 | -1.01159 |
| C | -2.37292 | -0.89765 | 2.54151  |
| C | -3.47232 | -0.04124 | 2.38772  |
| C | -2.42770 | -2.21256 | 2.04626  |
| C | -4.60835 | -0.51312 | 1.73377  |
| C | -3.58036 | -2.64430 | 1.40286  |
| C | -4.67944 | -1.80551 | 1.22992  |
| H | -5.44920 | 0.15580  | 1.59648  |
| H | -3.61625 | -3.65519 | 1.01160  |
| C | 2.37292  | 0.89765  | 2.54151  |
| C | 2.42770  | 2.21256  | 2.04626  |
| C | 3.47231  | 0.04124  | 2.38772  |
| C | 3.58037  | 2.64429  | 1.40286  |
| C | 4.60835  | 0.51311  | 1.73377  |
| C | 4.67944  | 1.80550  | 1.22992  |
| H | 3.61625  | 3.65518  | 1.01159  |
| H | 5.44919  | -0.15581 | 1.59648  |
| C | -3.41287 | 1.39009  | 2.84865  |
| H | -4.38253 | 1.87371  | 2.73252  |
| H | -3.11048 | 1.47275  | 3.89307  |
| H | -2.68347 | 1.95042  | 2.25736  |
| C | -1.23521 | -3.12196 | 2.15958  |
| H | -0.86947 | -3.17995 | 3.18624  |
| H | -1.48093 | -4.12808 | 1.82093  |
| H | -0.40868 | -2.75063 | 1.54753  |
| C | -5.90505 | -2.29156 | 0.50589  |
| H | -5.65682 | -2.62384 | -0.50501 |
| H | -6.35928 | -3.14138 | 1.02158  |
| H | -6.65700 | -1.50616 | 0.42827  |
| C | 3.41287  | -1.39009 | 2.84866  |
| H | 4.38252  | -1.87371 | 2.73253  |
| H | 3.11047  | -1.47275 | 3.89308  |
| H | 2.68346  | -1.95043 | 2.25737  |
| C | 1.23522  | 3.12196  | 2.15957  |
| H | 0.40868  | 2.75063  | 1.54753  |
| H | 0.86948  | 3.17995  | 3.18624  |
| H | 1.48094  | 4.12807  | 1.82092  |
| C | 5.90506  | 2.29154  | 0.50588  |
| H | 5.65683  | 2.62382  | -0.50501 |
| H | 6.35928  | 3.14137  | 1.02158  |
| H | 6.65700  | 1.50614  | 0.42827  |

|   |          |          |          |
|---|----------|----------|----------|
| C | 5.90506  | -2.29154 | -0.50588 |
| H | 5.65682  | -2.62382 | 0.50501  |
| H | 6.35928  | -3.14137 | -1.02158 |
| H | 6.65700  | -1.50614 | -0.42827 |
| C | -5.90506 | 2.29155  | -0.50589 |
| H | -5.65682 | 2.62383  | 0.50501  |
| H | -6.35928 | 3.14138  | -1.02158 |
| H | -6.65700 | 1.50615  | -0.42827 |
| C | -1.23521 | 3.12197  | -2.15958 |
| H | -0.86947 | 3.17995  | -3.18624 |
| H | -1.48093 | 4.12808  | -1.82092 |
| H | -0.40868 | 2.75063  | -1.54753 |
| C | 1.23522  | -3.12196 | -2.15957 |
| H | 0.86947  | -3.17995 | -3.18624 |
| H | 1.48093  | -4.12807 | -1.82092 |
| H | 0.40868  | -2.75063 | -1.54753 |
| C | 3.41287  | 1.39009  | -2.84866 |
| H | 4.38252  | 1.87371  | -2.73253 |
| H | 3.11048  | 1.47275  | -3.89308 |
| H | 2.68346  | 1.95043  | -2.25737 |
| C | -3.41287 | -1.39009 | -2.84866 |
| H | -4.38253 | -1.87371 | -2.73253 |
| H | -3.11048 | -1.47275 | -3.89308 |
| H | -2.68347 | -1.95042 | -2.25737 |

### 5.3.6 [P( $\mu$ -Nter)]<sub>2</sub>···PhCHO (vdW)

116  
[P( $\mu$ -Nter)]<sub>2</sub>···PhCHO (vdW) @ B3LYP-D3/def2-TZVP - C1

|   |          |          |          |
|---|----------|----------|----------|
| N | 0.20876  | -0.84645 | 0.26708  |
| P | -1.09511 | 0.29209  | 0.09295  |
| P | 1.50181  | 0.14178  | -0.23033 |
| C | 0.14994  | -2.21999 | 0.55490  |
| N | 0.26106  | 1.32659  | -0.24842 |
| C | -0.86296 | -0.41404 | -2.61703 |
| O | 0.36642  | -0.49671 | -2.66453 |
| C | -0.99076 | -2.74304 | 1.20853  |
| C | 1.22212  | -3.07960 | 0.22760  |
| C | 0.33672  | 2.71905  | -0.44625 |
| C | -1.78696 | -1.56970 | -2.70863 |
| H | -1.35724 | 0.55494  | -2.73857 |
| C | -1.10321 | -4.12195 | 1.36603  |
| C | -2.04314 | -1.87769 | 1.82432  |
| C | 1.05923  | -4.45205 | 0.40752  |
| C | 2.58313  | -2.60138 | -0.17173 |
| C | 1.57534  | 3.38143  | -0.31249 |
| C | -0.81271 | 3.48382  | -0.74079 |
| C | -3.11736 | -1.33503 | -3.06667 |
| C | -1.35010 | -2.88927 | -2.57280 |
| H | -1.98469 | -4.51223 | 1.85768  |
| C | -0.10524 | -4.98384 | 0.93910  |
| C | -1.72346 | -1.09221 | 2.95228  |
| C | -3.36034 | -1.88226 | 1.34136  |
| H | 1.88475  | -5.10179 | 0.14540  |
| C | 3.06164  | -2.71811 | -1.48964 |
| C | 3.45565  | -2.15645 | 0.84181  |
| C | 1.65400  | 4.75140  | -0.55018 |
| C | 2.81707  | 2.71015  | 0.16487  |
| C | -0.68950 | 4.85358  | -0.96289 |
| C | -2.18317 | 2.90430  | -0.80025 |
| H | -3.46490 | -0.31449 | -3.15621 |

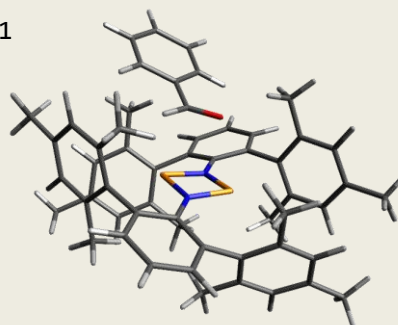

|   |          |          |          |
|---|----------|----------|----------|
| C | -3.98283 | -2.39134 | -3.31189 |
| C | -2.21602 | -3.94540 | -2.81159 |
| H | -0.33336 | -3.07825 | -2.27574 |
| H | -0.21192 | -6.05316 | 1.06641  |
| C | -2.70879 | -0.31089 | 3.54045  |
| C | -0.33154 | -1.05559 | 3.51661  |
| C | -4.31369 | -1.06774 | 1.95149  |
| C | -3.77372 | -2.73405 | 0.17654  |
| C | 4.37334  | -2.34678 | -1.76987 |
| C | 2.20128  | -3.21488 | -2.61498 |
| C | 4.76241  | -1.80891 | 0.51651  |
| C | 3.01118  | -2.04234 | 2.27446  |
| H | 2.61749  | 5.23303  | -0.44081 |
| C | 0.53514  | 5.49515  | -0.88731 |
| C | 2.97298  | 2.46406  | 1.54023  |
| C | 3.85225  | 2.40221  | -0.72830 |
| H | -1.58694 | 5.41490  | -1.19089 |
| C | -2.76419 | 2.61136  | -2.04527 |
| C | -2.92731 | 2.73834  | 0.37979  |
| H | -5.00877 | -2.19353 | -3.59676 |
| C | -3.53320 | -3.70243 | -3.19173 |
| H | -1.86396 | -4.96269 | -2.69600 |
| H | -2.44962 | 0.29407  | 4.40253  |
| C | -4.01057 | -0.27313 | 3.04679  |
| H | 0.32426  | -0.45242 | 2.88481  |
| H | 0.10897  | -2.05069 | 3.57713  |
| H | -0.33284 | -0.61442 | 4.51299  |
| H | -5.31998 | -1.05391 | 1.54811  |
| H | -4.06039 | -3.73780 | 0.50360  |
| H | -2.97049 | -2.85159 | -0.54238 |
| H | -4.63115 | -2.29852 | -0.33416 |
| H | 4.73042  | -2.43909 | -2.78946 |
| C | 5.24031  | -1.88865 | -0.78557 |
| H | 1.51471  | -2.42677 | -2.92813 |
| H | 1.61288  | -4.08517 | -2.32377 |
| H | 2.81613  | -3.49289 | -3.47103 |
| H | 5.42429  | -1.47904 | 1.30721  |
| H | 3.87301  | -1.94411 | 2.93406  |
| H | 2.42812  | -2.90690 | 2.59194  |
| H | 2.38647  | -1.15809 | 2.41632  |
| H | 0.61280  | 6.55981  | -1.06405 |
| C | 4.17324  | 1.93471  | 1.99853  |
| C | 1.85340  | 2.74295  | 2.50512  |
| C | 5.04235  | 1.88269  | -0.22559 |
| C | 3.67229  | 2.58614  | -2.21137 |
| C | -4.04202 | 2.06485  | -2.08049 |
| C | -2.03465 | 2.91111  | -3.32878 |
| C | -4.20426 | 2.18996  | 0.29858  |
| C | -2.36146 | 3.11804  | 1.72152  |
| H | -4.20607 | -4.52853 | -3.38341 |
| C | -5.05432 | 0.59184  | 3.69797  |
| C | 6.65152  | -1.49901 | -1.12756 |
| H | 4.29182  | 1.74340  | 3.05942  |
| C | 5.22750  | 1.65453  | 1.13329  |
| H | 1.00152  | 2.08462  | 2.31675  |
| H | 1.48782  | 3.76706  | 2.41153  |
| H | 2.17930  | 2.58480  | 3.53268  |
| H | 5.84252  | 1.64811  | -0.91756 |
| H | 4.52971  | 2.19047  | -2.75502 |
| H | 3.55460  | 3.63835  | -2.47875 |
| H | 2.77901  | 2.06490  | -2.56352 |
| H | -4.48470 | 1.82589  | -3.04136 |
| C | -4.76462 | 1.81545  | -0.91631 |

|   |          |          |          |
|---|----------|----------|----------|
| H | -2.48445 | 2.37819  | -4.16657 |
| H | -0.98014 | 2.64090  | -3.27231 |
| H | -2.07226 | 3.98041  | -3.55416 |
| H | -4.76643 | 2.03637  | 1.21053  |
| H | -1.85945 | 4.08543  | 1.68849  |
| H | -1.63020 | 2.37702  | 2.05392  |
| H | -3.15080 | 3.15957  | 2.47128  |
| H | -5.97581 | 0.60789  | 3.11536  |
| H | -4.70418 | 1.62060  | 3.80979  |
| H | -5.29950 | 0.22659  | 4.69872  |
| H | 7.04487  | -2.11233 | -1.93959 |
| H | 7.31443  | -1.60521 | -0.26818 |
| H | 6.69905  | -0.45710 | -1.45544 |
| C | 6.54262  | 1.15729  | 1.66637  |
| C | -6.09969 | 1.12702  | -0.97215 |
| H | 7.17358  | 1.99412  | 1.97983  |
| H | 7.09356  | 0.59655  | 0.91234  |
| H | 6.40198  | 0.51542  | 2.53768  |
| H | -5.96417 | 0.04227  | -1.02320 |
| H | -6.67028 | 1.42613  | -1.85313 |
| H | -6.69735 | 1.34254  | -0.08582 |

### 5.3.7 [P( $\mu$ -NTer)]<sub>2</sub>·PhCHO (2)

116  
[P( $\mu$ -NTer)]<sub>2</sub>·PhCHO @ PBE-D3/def2-TZVP - C1

|   |          |          |          |
|---|----------|----------|----------|
| N | 0.22027  | -0.88769 | 0.43586  |
| P | -1.14391 | 0.20561  | 0.06442  |
| P | 1.28394  | -0.01097 | -0.66052 |
| C | 0.18098  | -2.25583 | 0.73969  |
| N | 0.23450  | 1.29966  | -0.09827 |
| C | -1.01691 | -0.22537 | -1.82696 |
| O | 0.40193  | -0.36714 | -2.06309 |
| C | -0.92241 | -2.77924 | 1.47144  |
| C | 1.25165  | -3.12353 | 0.38867  |
| C | 0.32811  | 2.65858  | -0.42090 |
| C | -1.83149 | -1.39878 | -2.27110 |
| H | -1.36375 | 0.68005  | -2.34216 |
| C | -0.99110 | -4.15518 | 1.71390  |
| C | -1.98593 | -1.90130 | 2.04049  |
| C | 1.13712  | -4.49208 | 0.66461  |
| C | 2.55154  | -2.63122 | -0.16115 |
| C | 1.60162  | 3.28428  | -0.33056 |
| C | -0.79827 | 3.44566  | -0.77818 |
| C | -3.15422 | -1.18876 | -2.69315 |
| C | -1.33094 | -2.70545 | -2.26429 |
| H | -1.84948 | -4.53697 | 2.26952  |
| C | 0.01519  | -5.02284 | 1.29621  |
| C | -1.66940 | -1.01123 | 3.09671  |
| C | -3.31858 | -1.98461 | 1.57851  |
| H | 1.97129  | -5.14025 | 0.38805  |
| C | 2.94968  | -2.87763 | -1.49612 |
| C | 3.46165  | -2.00713 | 0.72837  |
| C | 1.73347  | 4.63009  | -0.69156 |
| C | 2.80837  | 2.61178  | 0.23424  |
| C | -0.61743 | 4.79338  | -1.11602 |
| C | -2.19460 | 2.92359  | -0.76189 |
| H | -3.55886 | -0.17476 | -2.69316 |
| C | -3.94754 | -2.25735 | -3.10902 |
| C | -2.12001 | -3.77392 | -2.69177 |
| H | -0.31723 | -2.88243 | -1.91967 |

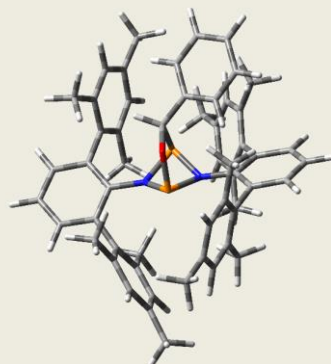

|   |          |          |          |
|---|----------|----------|----------|
| H | -0.05379 | -6.09215 | 1.49866  |
| C | -2.67295 | -0.20028 | 3.63040  |
| C | -0.27527 | -0.91412 | 3.65151  |
| C | -4.28758 | -1.14096 | 2.13545  |
| C | -3.72896 | -2.95242 | 0.50312  |
| C | 4.20597  | -2.43493 | -1.92518 |
| C | 2.06982  | -3.58004 | -2.49522 |
| C | 4.71397  | -1.60758 | 0.26016  |
| C | 3.10188  | -1.75698 | 2.16666  |
| H | 2.72111  | 5.08832  | -0.60872 |
| C | 0.63928  | 5.39014  | -1.09781 |
| C | 2.88590  | 2.38682  | 1.62779  |
| C | 3.92178  | 2.32894  | -0.58483 |
| H | -1.50018 | 5.37728  | -1.38447 |
| C | -2.88261 | 2.69669  | -1.97615 |
| C | -2.87449 | 2.76487  | 0.46789  |
| H | -4.97263 | -2.07354 | -3.43662 |
| C | -3.43180 | -3.55610 | -3.11795 |
| H | -1.70659 | -4.78412 | -2.68155 |
| H | -2.41703 | 0.48391  | 4.44460  |
| C | -3.98939 | -0.24075 | 3.15835  |
| H | 0.37912  | -0.34876 | 2.97025  |
| H | 0.18087  | -1.90586 | 3.77684  |
| H | -0.27714 | -0.40163 | 4.62242  |
| H | -5.31013 | -1.19252 | 1.75053  |
| H | -3.97477 | -3.93801 | 0.93047  |
| H | -2.93450 | -3.11502 | -0.23332 |
| H | -4.62097 | -2.59137 | -0.02499 |
| H | 4.49756  | -2.61966 | -2.96312 |
| C | 5.10032  | -1.78983 | -1.06975 |
| H | 1.47575  | -2.85082 | -3.06756 |
| H | 1.37221  | -4.27876 | -2.01761 |
| H | 2.68094  | -4.14170 | -3.21503 |
| H | 5.40905  | -1.13894 | 0.95857  |
| H | 3.99641  | -1.50802 | 2.75203  |
| H | 2.60850  | -2.62653 | 2.62264  |
| H | 2.40569  | -0.90847 | 2.25419  |
| H | 0.75989  | 6.44110  | -1.36266 |
| C | 4.07990  | 1.90638  | 2.17328  |
| C | 1.71600  | 2.67765  | 2.52737  |
| C | 5.10127  | 1.86651  | 0.00675  |
| C | 3.83989  | 2.47097  | -2.08122 |
| C | -4.20545 | 2.24579  | -1.93483 |
| C | -2.21938 | 2.93825  | -3.30780 |
| C | -4.20061 | 2.32125  | 0.46054  |
| C | -2.19436 | 3.05451  | 1.77701  |
| H | -4.04889 | -4.39134 | -3.45251 |
| C | -5.05357 | 0.63340  | 3.76518  |
| C | 6.43511  | -1.30662 | -1.56736 |
| H | 4.13409  | 1.73993  | 3.25302  |
| C | 5.20741  | 1.65995  | 1.38415  |
| H | 0.87324  | 2.00573  | 2.30487  |
| H | 1.34631  | 3.70417  | 2.38574  |
| H | 1.99111  | 2.54871  | 3.58221  |
| H | 5.96116  | 1.65030  | -0.63251 |
| H | 4.78098  | 2.16029  | -2.55388 |
| H | 3.62168  | 3.50243  | -2.39249 |
| H | 3.03180  | 1.84141  | -2.48751 |
| H | -4.72731 | 2.05552  | -2.87738 |
| C | -4.87641 | 2.03062  | -0.72589 |
| H | -2.71502 | 2.36437  | -4.10263 |
| H | -1.15303 | 2.67340  | -3.29235 |
| H | -2.26829 | 4.00276  | -3.58689 |

|   |          |          |          |
|---|----------|----------|----------|
| H | -4.71418 | 2.18667  | 1.41457  |
| H | -1.53146 | 3.92724  | 1.70741  |
| H | -1.57775 | 2.19715  | 2.09426  |
| H | -2.93412 | 3.23036  | 2.56894  |
| H | -5.94183 | 0.69002  | 3.12093  |
| H | -4.68587 | 1.65578  | 3.93806  |
| H | -5.37887 | 0.24068  | 4.74184  |
| H | 6.89830  | -2.03292 | -2.25057 |
| H | 7.12997  | -1.12191 | -0.73687 |
| H | 6.32547  | -0.36210 | -2.12435 |
| C | 6.49888  | 1.20081  | 2.00650  |
| C | -6.26960 | 1.46425  | -0.70298 |
| H | 7.01583  | 2.03493  | 2.50736  |
| H | 7.18598  | 0.79402  | 1.25180  |
| H | 6.32734  | 0.42651  | 2.76929  |
| H | -6.23545 | 0.36221  | -0.68911 |
| H | -6.84451 | 1.76317  | -1.59048 |
| H | -6.82017 | 1.78534  | 0.19200  |

116

[P( $\mu$ -NTer)]<sub>2</sub>·PhCHO @ B3LYP-D3/def2-TZVP - C1

|   |          |          |          |
|---|----------|----------|----------|
| N | 0.24726  | -0.87510 | 0.38792  |
| P | -1.13294 | 0.20098  | 0.06581  |
| P | 1.23990  | -0.00419 | -0.76521 |
| C | 0.22661  | -2.24068 | 0.70600  |
| N | 0.20975  | 1.29218  | -0.19279 |
| C | -1.10396 | -0.28280 | -1.80143 |
| O | 0.30310  | -0.40701 | -2.09665 |
| C | -0.83174 | -2.75542 | 1.49438  |
| C | 1.26991  | -3.10864 | 0.30708  |
| C | 0.31108  | 2.66600  | -0.44037 |
| C | -1.91505 | -1.48302 | -2.17265 |
| H | -1.48281 | 0.58491  | -2.33289 |
| C | -0.89332 | -4.12304 | 1.74342  |
| C | -1.85866 | -1.86385 | 2.10753  |
| C | 1.16434  | -4.46973 | 0.58691  |
| C | 2.54729  | -2.61277 | -0.29032 |
| C | 1.56780  | 3.28498  | -0.25447 |
| C | -0.79239 | 3.46218  | -0.81293 |
| C | -3.24902 | -1.30485 | -2.54813 |
| C | -1.40199 | -2.77603 | -2.13867 |
| H | -1.71612 | -4.49927 | 2.33771  |
| C | 0.07936  | -4.99211 | 1.27339  |
| C | -1.47770 | -0.95932 | 3.12017  |
| C | -3.20127 | -1.91799 | 1.70088  |
| H | 1.97249  | -5.11838 | 0.27216  |
| C | 2.87499  | -2.79795 | -1.64519 |
| C | 3.49063  | -2.01455 | 0.57001  |
| C | 1.71523  | 4.63858  | -0.54677 |
| C | 2.73117  | 2.58429  | 0.36166  |
| C | -0.60200 | 4.81723  | -1.07982 |
| C | -2.18398 | 2.93438  | -0.87497 |
| H | -3.66234 | -0.30566 | -2.57418 |
| C | -4.04201 | -2.39121 | -2.89179 |
| C | -2.19023 | -3.86365 | -2.49263 |
| H | -0.38532 | -2.93397 | -1.83076 |
| H | 0.01557  | -6.05272 | 1.47742  |
| C | -2.42679 | -0.09805 | 3.65500  |
| C | -0.06229 | -0.89457 | 3.62251  |
| C | -4.11715 | -1.02319 | 2.25444  |
| C | -3.68927 | -2.91043 | 0.68264  |
| C | 4.09047  | -2.31081 | -2.12210 |

|   |          |          |          |
|---|----------|----------|----------|
| C | 1.96042  | -3.48238 | -2.62448 |
| C | 4.70277  | -1.57334 | 0.05632  |
| C | 3.20773  | -1.82207 | 2.03412  |
| H | 2.68599  | 5.09342  | -0.39400 |
| C | 0.64514  | 5.41005  | -0.97357 |
| C | 2.70912  | 2.31100  | 1.74150  |
| C | 3.88355  | 2.30605  | -0.38606 |
| H | -1.46419 | 5.40811  | -1.36314 |
| C | -2.78991 | 2.67896  | -2.11768 |
| C | -2.92126 | 2.76736  | 0.30839  |
| H | -5.07293 | -2.23148 | -3.18269 |
| C | -3.51409 | -3.67781 | -2.87222 |
| H | -1.76746 | -4.85984 | -2.45977 |
| H | -2.12360 | 0.59893  | 4.42886  |
| C | -3.75160 | -0.10155 | 3.22364  |
| H | 0.59037  | -0.43003 | 2.88292  |
| H | 0.33739  | -1.88946 | 3.82217  |
| H | -0.00647 | -0.30782 | 4.53915  |
| H | -5.14405 | -1.04874 | 1.90700  |
| H | -3.95525 | -3.85787 | 1.16043  |
| H | -2.93813 | -3.13268 | -0.06823 |
| H | -4.57866 | -2.53737 | 0.17688  |
| H | 4.32538  | -2.44240 | -3.17276 |
| C | 5.01209  | -1.68437 | -1.29414 |
| H | 1.30102  | -2.75828 | -3.10710 |
| H | 1.33790  | -4.23731 | -2.14865 |
| H | 2.54389  | -3.96825 | -3.40726 |
| H | 5.42225  | -1.12795 | 0.72937  |
| H | 4.13594  | -1.68907 | 2.58901  |
| H | 2.66410  | -2.66477 | 2.45922  |
| H | 2.60272  | -0.92784 | 2.19460  |
| H | 0.77485  | 6.46329  | -1.18477 |
| C | 3.84580  | 1.78572  | 2.34585  |
| C | 1.48777  | 2.59844  | 2.57150  |
| C | 5.00529  | 1.79508  | 0.26192  |
| C | 3.91168  | 2.50861  | -1.87697 |
| C | -4.09441 | 2.19981  | -2.14906 |
| C | -2.04345 | 2.91108  | -3.40532 |
| C | -4.22393 | 2.27791  | 0.23322  |
| C | -2.32644 | 3.08907  | 1.65124  |
| H | -4.12886 | -4.52528 | -3.14698 |
| C | -4.75578 | 0.84645  | 3.81916  |
| C | 6.30033  | -1.13598 | -1.84183 |
| H | 3.82472  | 1.58133  | 3.41086  |
| C | 5.01123  | 1.53718  | 1.62671  |
| H | 0.65083  | 1.97014  | 2.26475  |
| H | 1.16575  | 3.63537  | 2.45769  |
| H | 1.68458  | 2.41254  | 3.62693  |
| H | 5.89407  | 1.58277  | -0.32049 |
| H | 4.87027  | 2.19572  | -2.29030 |
| H | 3.74466  | 3.54966  | -2.15703 |
| H | 3.12852  | 1.91962  | -2.36133 |
| H | -4.55254 | 1.98975  | -3.10959 |
| C | -4.82012 | 1.96831  | -0.98143 |
| H | -2.54780 | 2.42236  | -4.23892 |
| H | -1.01934 | 2.53840  | -3.35316 |
| H | -1.97240 | 3.97744  | -3.63315 |
| H | -4.77835 | 2.12578  | 1.15085  |
| H | -1.64468 | 3.93646  | 1.59754  |
| H | -1.76383 | 2.23627  | 2.03974  |
| H | -3.11021 | 3.31585  | 2.37346  |
| H | -5.68232 | 0.85557  | 3.24419  |
| H | -4.36581 | 1.86557  | 3.85541  |

|   |          |          |          |
|---|----------|----------|----------|
| H | -5.00547 | 0.56101  | 4.84474  |
| H | 6.67628  | -1.74506 | -2.66532 |
| H | 7.07121  | -1.08678 | -1.07172 |
| H | 6.15434  | -0.12243 | -2.22634 |
| C | 6.23931  | 1.00845  | 2.31596  |
| C | -6.19537 | 1.36274  | -1.03881 |
| H | 6.65229  | 1.74841  | 3.00663  |
| H | 7.01934  | 0.75470  | 1.59751  |
| H | 6.01433  | 0.11424  | 2.90247  |
| H | -6.13106 | 0.27824  | -1.17033 |
| H | -6.77318 | 1.75879  | -1.87578 |
| H | -6.75077 | 1.54922  | -0.11926 |

### 5.3.8 [P( $\mu$ -NTer)]<sub>2</sub> · C<sub>6</sub>H<sub>4</sub>NO<sub>2</sub>CHO (3)

118

[P( $\mu$ -NTer)]<sub>2</sub> · C<sub>6</sub>H<sub>4</sub>NO<sub>2</sub>CHO @ PBE-D3/def2-TZVP - C1

|   |          |          |          |
|---|----------|----------|----------|
| P | 1.40633  | 0.33477  | -0.69167 |
| P | -0.69191 | -0.74213 | 0.25782  |
| O | 0.22432  | 0.61808  | -1.88417 |
| N | 0.88214  | -1.30445 | -0.29022 |
| N | 0.33741  | 0.65819  | 0.67023  |
| C | -1.02415 | 0.00290  | -1.52418 |
| C | 1.33087  | -2.50719 | -0.85201 |
| C | -0.05463 | 1.89213  | 1.21399  |
| H | -1.18052 | -0.88202 | -2.15476 |
| C | -2.20589 | 0.90387  | -1.61757 |
| C | 2.73358  | -2.71610 | -0.94233 |
| C | 0.45215  | -3.53496 | -1.28127 |
| C | -1.13021 | 1.93594  | 2.14524  |
| C | 0.64271  | 3.09134  | 0.90258  |
| C | -3.47276 | 0.33834  | -1.85462 |
| C | -2.10647 | 2.29328  | -1.45954 |
| C | 3.21577  | -3.88351 | -1.54546 |
| C | 3.73649  | -1.80168 | -0.32156 |
| C | 0.98348  | -4.69362 | -1.86334 |
| C | -1.02611 | -3.47409 | -1.09694 |
| C | -1.55927 | 3.17431  | 2.63462  |
| C | -1.78414 | 0.69350  | 2.64783  |
| C | 0.17639  | 4.30402  | 1.42612  |
| C | 1.92511  | 3.10467  | 0.13504  |
| H | -3.56025 | -0.74320 | -1.97124 |
| C | -4.60562 | 1.13675  | -1.94481 |
| C | -3.23039 | 3.10646  | -1.55541 |
| H | -1.13669 | 2.73518  | -1.25710 |
| H | 4.29713  | -4.02472 | -1.59895 |
| C | 2.35465  | -4.86974 | -2.02085 |
| C | 4.62929  | -1.05738 | -1.12075 |
| C | 3.87948  | -1.79493 | 1.08581  |
| H | 0.28840  | -5.47295 | -2.18208 |
| C | -1.59255 | -3.73125 | 0.17243  |
| C | -1.87054 | -3.27590 | -2.21424 |
| H | -2.39083 | 3.18926  | 3.34118  |
| C | -0.93413 | 4.36270  | 2.26455  |
| C | -1.05040 | -0.20588 | 3.46246  |
| C | -3.14000 | 0.41928  | 2.35962  |
| H | 0.72581  | 5.21395  | 1.17629  |
| C | 2.02043  | 3.63071  | -1.17483 |
| C | 3.10481  | 2.68190  | 0.79846  |
| H | -5.59180 | 0.71455  | -2.13169 |
| C | -4.47140 | 2.51856  | -1.79962 |

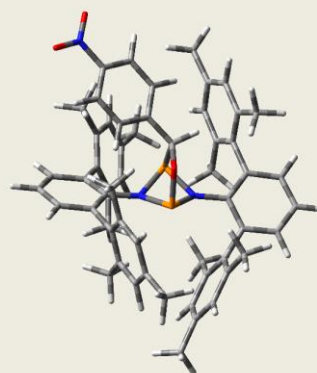



|   |          |          |          |
|---|----------|----------|----------|
| H | -3.16429 | 4.18670  | -1.43558 |
| H | 2.74905  | -5.77910 | -2.47549 |
| C | 5.66611  | -0.35042 | -0.50272 |
| C | 4.44937  | -0.96399 | -2.61212 |
| C | 4.91863  | -1.05811 | 1.66012  |
| C | 2.95050  | -2.58707 | 1.96485  |
| C | -2.98515 | -3.71564 | 0.31217  |
| C | -0.73073 | -4.02063 | 1.37029  |
| C | -3.25601 | -3.27107 | -2.02770 |
| C | -1.30113 | -3.07437 | -3.59503 |
| H | -1.28224 | 5.31834  | 2.65754  |
| C | -1.66390 | -1.37716 | 3.90991  |
| C | 0.37513  | 0.07073  | 3.85248  |
| C | -3.70607 | -0.77838 | 2.81503  |
| C | -4.00270 | 1.37878  | 1.58691  |
| C | 3.26447  | 3.64156  | -1.81578 |
| C | 0.83401  | 4.16646  | -1.93045 |
| C | 4.32702  | 2.74137  | 0.12822  |
| C | 3.06601  | 2.16082  | 2.20833  |
| N | -5.66842 | 3.37013  | -1.88945 |
| H | 6.35673  | 0.22237  | -1.12697 |
| C | 5.83540  | -0.34266 | 0.88323  |
| H | 5.28500  | -0.42123 | -3.07329 |
| H | 3.52095  | -0.41930 | -2.85229 |
| H | 4.37024  | -1.95007 | -3.08932 |
| H | 5.02576  | -1.06211 | 2.74866  |
| H | 2.90312  | -3.64079 | 1.65191  |
| H | 1.92394  | -2.19465 | 1.90942  |
| H | 3.27645  | -2.54981 | 3.01237  |
| H | -3.41539 | -3.89955 | 1.29921  |
| C | -3.83415 | -3.46677 | -0.76723 |
| H | 0.18946  | -4.55057 | 1.09277  |
| H | -1.27960 | -4.62348 | 2.10590  |
| H | -0.43754 | -3.08461 | 1.87460  |
| H | -3.90404 | -3.10667 | -2.89365 |
| H | -0.40319 | -2.44014 | -3.58177 |
| H | -2.04486 | -2.61946 | -4.26281 |
| H | -0.99272 | -4.03246 | -4.04185 |
| H | -1.08836 | -2.06426 | 4.53693  |
| C | -2.98758 | -1.69424 | 3.58290  |
| H | 0.67493  | -0.55840 | 4.70074  |
| H | 0.52259  | 1.12469  | 4.12548  |
| H | 1.05917  | -0.13917 | 3.01615  |
| H | -4.74655 | -0.99646 | 2.55809  |
| H | -3.42692 | 1.95707  | 0.85646  |
| H | -4.48243 | 2.10590  | 2.26172  |
| H | -4.80463 | 0.84514  | 1.06074  |
| H | 3.32309  | 4.03589  | -2.83428 |
| C | 4.42798  | 3.19085  | -1.19072 |
| H | 1.14135  | 4.98656  | -2.59361 |
| H | 0.05010  | 4.54357  | -1.26235 |
| H | 0.39257  | 3.38200  | -2.56466 |
| H | 5.22883  | 2.42522  | 0.65475  |
| H | 2.68930  | 1.12659  | 2.23299  |
| H | 2.40630  | 2.76130  | 2.84958  |
| H | 4.07302  | 2.15137  | 2.64496  |
| O | -5.51626 | 4.58976  | -1.77109 |
| O | -6.75624 | 2.81379  | -2.07389 |
| C | 6.97177  | 0.40567  | 1.52685  |
| C | -5.32344 | -3.37661 | -0.57576 |
| C | -3.62136 | -2.96471 | 4.08095  |
| C | 5.74613  | 3.18873  | -1.91497 |
| H | 7.71576  | -0.28756 | 1.94982  |

|   |          |          |          |
|---|----------|----------|----------|
| H | 6.61930  | 1.03943  | 2.35507  |
| H | 7.49111  | 1.04741  | 0.80205  |
| H | -5.86824 | -3.68569 | -1.47843 |
| H | -5.62263 | -2.33929 | -0.35103 |
| H | -5.65965 | -4.00061 | 0.26358  |
| H | -2.95632 | -3.82922 | 3.93711  |
| H | -4.56958 | -3.16867 | 3.56516  |
| H | -3.83736 | -2.90309 | 5.15935  |
| H | 5.82919  | 2.30573  | -2.56924 |
| H | 6.59020  | 3.15946  | -1.21251 |

### 5.3.9 $[P(\mu\text{-Nter})]_2 \cdot C_6H_4ClCHO$ (4)

116  
 $[P(\mu\text{-Nter})]_2C_6H_4ClCHO$  @ PBE-D3/def2-TZVP - C1

|    |          |          |          |
|----|----------|----------|----------|
| Cl | 5.58156  | -4.03305 | -2.25645 |
| C  | 4.26486  | -2.90611 | -2.06410 |
| C  | 2.98998  | -3.37785 | -1.75200 |
| C  | 4.50033  | -1.53833 | -2.21333 |
| C  | 1.94581  | -2.46848 | -1.58883 |
| H  | 2.81873  | -4.44684 | -1.62600 |
| H  | 5.50179  | -1.18236 | -2.45538 |
| C  | 3.44378  | -0.64399 | -2.05703 |
| C  | 2.15034  | -1.09361 | -1.74733 |
| H  | 0.95763  | -2.83409 | -1.32854 |
| H  | 3.62413  | 0.42624  | -2.17578 |
| C  | 1.05441  | -0.09060 | -1.58048 |
| P  | 0.84512  | 0.62268  | 0.21781  |
| O  | -0.25825 | -0.58731 | -1.91906 |
| H  | 1.26432  | 0.78933  | -2.20259 |
| P  | -1.36838 | -0.24649 | -0.68069 |
| N  | -0.70088 | 1.33259  | -0.24971 |
| N  | -0.28798 | -0.69629 | 0.63642  |
| C  | -1.05885 | 2.58173  | -0.77115 |
| C  | 0.01548  | -1.97059 | 1.13834  |
| C  | -0.10610 | 3.54808  | -1.18676 |
| C  | -2.44119 | 2.90724  | -0.83456 |
| C  | -0.78969 | -3.10006 | 0.82473  |
| C  | 1.11352  | -2.12850 | 2.03098  |
| C  | -0.54930 | 4.76267  | -1.72704 |
| C  | 1.36482  | 3.36135  | -1.03116 |
| C  | -2.83492 | 4.12682  | -1.39689 |
| C  | -3.50896 | 2.05781  | -0.23003 |
| C  | -0.40837 | -4.36067 | 1.30190  |
| C  | -2.09576 | -2.99202 | 0.10554  |
| C  | 1.45446  | -3.41073 | 2.47419  |
| C  | 1.88473  | -0.96010 | 2.54546  |
| H  | 0.20286  | 5.49150  | -2.03577 |
| C  | -1.90345 | 5.05457  | -1.85733 |
| C  | 1.96933  | 3.53227  | 0.23519  |
| C  | 2.17308  | 3.12621  | -2.16748 |
| H  | -3.90200 | 4.35589  | -1.42995 |
| C  | -4.46399 | 1.41434  | -1.04463 |
| C  | -3.64068 | 2.01362  | 1.17710  |
| H  | -1.04046 | -5.21484 | 1.05032  |
| C  | 0.72117  | -4.53366 | 2.09808  |
| C  | -3.21359 | -2.49706 | 0.82287  |
| C  | -2.27942 | -3.47659 | -1.21099 |
| H  | 2.30471  | -3.51224 | 3.15087  |
| C  | 3.24892  | -0.79055 | 2.21820  |
| C  | 1.25595  | -0.02928 | 3.41033  |

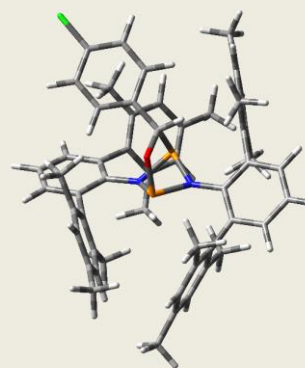

|   |          |          |          |
|---|----------|----------|----------|
| H | -2.22878 | 6.00591  | -2.27961 |
| C | 3.35723  | 3.39647  | 0.35119  |
| C | 1.14846  | 3.85392  | 1.45319  |
| C | 3.55543  | 2.99719  | -2.00413 |
| C | 1.56946  | 3.01591  | -3.54396 |
| C | -5.54977 | 0.77191  | -0.44130 |
| C | -4.30347 | 1.36862  | -2.54061 |
| C | -4.73293 | 1.34486  | 1.73672  |
| C | -2.64027 | 2.69268  | 2.07201  |
| H | 1.00084  | -5.52490 | 2.45626  |
| C | -4.46249 | -2.45327 | 0.20204  |
| C | -3.08006 | -2.00803 | 2.23832  |
| C | -3.54588 | -3.38724 | -1.79941 |
| C | -1.16075 | -4.06579 | -2.02755 |
| C | 3.92980  | 0.33688  | 2.69448  |
| C | 3.99759  | -1.78579 | 1.37531  |
| C | 1.98144  | 1.06917  | 3.87514  |
| C | -0.17747 | -0.19302 | 3.83377  |
| H | 3.81577  | 3.51358  | 1.33546  |
| C | 4.16575  | 3.10610  | -0.74877 |
| H | 0.72095  | 2.93607  | 1.88992  |
| H | 0.31275  | 4.52498  | 1.21472  |
| H | 1.77016  | 4.32069  | 2.22840  |
| H | 4.17445  | 2.80260  | -2.88501 |
| H | 0.61264  | 2.47495  | -3.53154 |
| H | 2.25539  | 2.50460  | -4.23266 |
| H | 1.35425  | 4.01084  | -3.96443 |
| H | -6.28705 | 0.27514  | -1.07723 |
| C | -5.71058 | 0.73366  | 0.94553  |
| H | -3.35341 | 0.88141  | -2.81387 |
| H | -4.28403 | 2.37128  | -2.99061 |
| H | -5.12051 | 0.79920  | -3.00295 |
| H | -4.83087 | 1.31909  | 2.82585  |
| H | -2.96142 | 2.65151  | 3.12090  |
| H | -2.50071 | 3.74709  | 1.79060  |
| H | -1.65328 | 2.21211  | 1.99412  |
| H | -5.31666 | -2.08112 | 0.76988  |
| C | -4.64879 | -2.87015 | -1.11797 |
| H | -4.06670 | -1.91170 | 2.70957  |
| H | -2.60510 | -1.01528 | 2.26541  |
| H | -2.45892 | -2.67958 | 2.84707  |
| H | -3.67247 | -3.75238 | -2.82264 |
| H | -0.39979 | -4.55000 | -1.40305 |
| H | -0.66236 | -3.28360 | -2.62107 |
| H | -1.55253 | -4.81201 | -2.73209 |
| H | 4.97617  | 0.47582  | 2.40785  |
| C | 3.31755  | 1.28191  | 3.51723  |
| H | 4.42541  | -2.58743 | 1.99873  |
| H | 4.83038  | -1.30216 | 0.84866  |
| H | 3.35193  | -2.26973 | 0.63502  |
| H | 1.48530  | 1.78208  | 4.54008  |
| H | -0.41093 | -1.23859 | 4.07758  |
| H | -0.86177 | 0.10428  | 3.02443  |
| H | -0.39798 | 0.43099  | 4.70975  |
| C | 5.64379  | 2.87959  | -0.58498 |
| C | -6.90410 | 0.06576  | 1.57433  |
| C | -5.99218 | -2.76384 | -1.78626 |
| C | 4.07525  | 2.47312  | 4.03809  |
| H | 6.03821  | 3.41407  | 0.29002  |
| H | 6.20519  | 3.20396  | -1.47225 |
| H | 5.85552  | 1.80760  | -0.43672 |
| H | -6.60996 | -0.57486 | 2.41954  |
| H | -7.44690 | -0.55347 | 0.84699  |

|   |          |          |          |
|---|----------|----------|----------|
| H | -7.61343 | 0.81039  | 1.96919  |
| H | -6.20562 | -3.64582 | -2.40696 |
| H | -6.02954 | -1.88443 | -2.44945 |
| H | -6.79958 | -2.65644 | -1.04918 |
| H | 4.33732  | 2.34259  | 5.10014  |
| H | 3.47686  | 3.39359  | 3.96723  |
| H | 5.01136  | 2.62640  | 3.48377  |

### 5.3.10 [P( $\mu$ -Nter)]<sub>2</sub> · EtCHO (5)

112

[P( $\mu$ -Nter)]<sub>2</sub> · EtCHO @ PBE-D3/def2-TZVP - C1

|   |          |          |          |
|---|----------|----------|----------|
| P | -1.27295 | -0.08081 | -0.58628 |
| P | 1.25382  | 0.03400  | -0.30316 |
| O | -0.67932 | -0.05579 | -2.16583 |
| N | -0.13484 | 1.09594  | 0.05969  |
| N | -0.00775 | -1.15567 | 0.05912  |
| C | 0.77113  | 0.02121  | -2.16124 |
| C | -0.19790 | 2.49268  | 0.13444  |
| C | 0.00249  | -2.55444 | -0.00530 |
| H | 1.15530  | -0.91020 | -2.60080 |
| C | 1.28028  | 1.22285  | -2.94074 |
| C | 0.90351  | 3.22853  | 0.65571  |
| C | -1.37426 | 3.19807  | -0.23365 |
| C | -1.18725 | -3.25971 | 0.32698  |
| C | 1.16793  | -3.29757 | -0.33030 |
| H | 1.02122  | 2.15121  | -2.40576 |
| H | 0.74528  | 1.26356  | -3.90374 |
| C | 2.78666  | 1.13774  | -3.18778 |
| C | 0.83028  | 4.62540  | 0.71902  |
| C | 2.13001  | 2.57389  | 1.19090  |
| C | -1.40241 | 4.59434  | -0.14216 |
| C | -2.62922 | 2.50572  | -0.64624 |
| C | -1.20680 | -4.65617 | 0.24185  |
| C | -2.41181 | -2.58649 | 0.84960  |
| C | 1.10178  | -4.69555 | -0.39165 |
| C | 2.49402  | -2.65683 | -0.55861 |
| H | 3.15264  | 2.03399  | -3.70741 |
| H | 3.03315  | 0.26153  | -3.80506 |
| H | 3.34447  | 1.03776  | -2.24565 |
| H | 1.68726  | 5.16472  | 1.12702  |
| C | -0.30551 | 5.32059  | 0.31428  |
| C | 2.06751  | 1.82871  | 2.39187  |
| C | 3.37288  | 2.75658  | 0.54561  |
| H | -2.32234 | 5.10639  | -0.43206 |
| C | -2.99191 | 2.39444  | -2.00649 |
| C | -3.51065 | 2.04231  | 0.35854  |
| H | -2.13196 | -5.17218 | 0.50687  |
| C | -0.07791 | -5.38431 | -0.12705 |
| C | -2.41955 | -2.09018 | 2.17291  |
| C | -3.58807 | -2.53408 | 0.07281  |
| H | 2.01384  | -5.24140 | -0.64173 |
| C | 3.04539  | -2.59612 | -1.85827 |
| C | 3.25345  | -2.20341 | 0.54630  |
| H | -0.34538 | 6.40839  | 0.37916  |
| C | 3.23898  | 1.26517  | 2.90379  |
| C | 0.76800  | 1.63509  | 3.12460  |
| C | 4.51771  | 2.16189  | 1.08788  |
| C | 3.49988  | 3.58346  | -0.70794 |
| C | -4.20083 | 1.77131  | -2.33521 |
| C | -2.09365 | 2.88977  | -3.10619 |

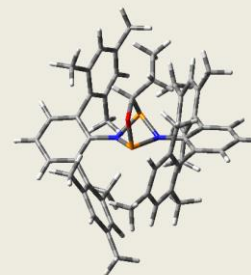

|   |          |          |          |
|---|----------|----------|----------|
| C | -4.71753 | 1.45076  | -0.01620 |
| C | -3.14499 | 2.14966  | 1.81380  |
| H | -0.11003 | -6.47318 | -0.17715 |
| C | -3.60332 | -1.55922 | 2.69263  |
| C | -1.18048 | -2.13781 | 3.02444  |
| C | -4.75384 | -2.00911 | 0.63936  |
| C | -3.58817 | -2.97793 | -1.36581 |
| C | 4.30300  | -2.01041 | -2.03740 |
| C | 2.31596  | -3.16729 | -3.04680 |
| C | 4.51677  | -1.65232 | 0.32336  |
| C | 2.71186  | -2.29147 | 1.94572  |
| H | 3.18303  | 0.69229  | 3.83379  |
| C | 4.47536  | 1.41627  | 2.26759  |
| H | 0.94372  | 1.24493  | 4.13556  |
| H | 0.11767  | 0.92446  | 2.59082  |
| H | 0.20649  | 2.57710  | 3.20303  |
| H | 5.47353  | 2.29129  | 0.57177  |
| H | 3.60049  | 4.65434  | -0.47069 |
| H | 2.61838  | 3.48932  | -1.35480 |
| H | 4.38991  | 3.28854  | -1.27973 |
| H | -4.47093 | 1.67379  | -3.39058 |
| C | -5.07319 | 1.28579  | -1.35801 |
| H | -1.51065 | 3.76705  | -2.79825 |
| H | -2.67730 | 3.14873  | -3.99995 |
| H | -1.37970 | 2.10131  | -3.38771 |
| H | -5.39524 | 1.09783  | 0.76324  |
| H | -2.81219 | 3.16382  | 2.07735  |
| H | -2.31589 | 1.46706  | 2.06115  |
| H | -3.99646 | 1.87864  | 2.45107  |
| H | -3.60262 | -1.17792 | 3.71792  |
| C | -4.78661 | -1.52239 | 1.94808  |
| H | -0.39780 | -1.48199 | 2.61365  |
| H | -0.75578 | -3.15210 | 3.05882  |
| H | -1.39730 | -1.81506 | 4.05105  |
| H | -5.66154 | -1.96578 | 0.03170  |
| H | -4.57539 | -2.82260 | -1.82076 |
| H | -3.32099 | -4.03866 | -1.47530 |
| H | -2.85033 | -2.40559 | -1.95114 |
| H | 4.71210  | -1.93752 | -3.04903 |
| C | 5.04868  | -1.51902 | -0.96207 |
| H | 1.22615  | -3.06986 | -2.95085 |
| H | 2.52212  | -4.24448 | -3.15290 |
| H | 2.63754  | -2.67880 | -3.97706 |
| H | 5.09448  | -1.29960 | 1.17968  |
| H | 3.51364  | -2.15704 | 2.68320  |
| H | 2.21379  | -3.25340 | 2.12949  |
| H | 1.96514  | -1.50071 | 2.12502  |
| C | 5.72785  | 0.83000  | 2.86168  |
| C | -6.35080 | 0.58922  | -1.74066 |
| C | -6.05846 | -0.98633 | 2.54883  |
| C | 6.37135  | -0.83613 | -1.17960 |
| H | 6.16501  | 1.51043  | 3.61021  |
| H | 6.49383  | 0.65519  | 2.09320  |
| H | 5.52542  | -0.12257 | 3.37235  |
| H | -6.15297 | -0.45550 | -2.03075 |
| H | -6.83616 | 1.07669  | -2.59825 |
| H | -7.06358 | 0.57042  | -0.90492 |
| H | -5.88758 | -0.03308 | 3.07170  |
| H | -6.47429 | -1.68752 | 3.28977  |
| H | -6.82709 | -0.82341 | 1.78088  |

|   |         |          |          |
|---|---------|----------|----------|
| H | 6.23993 | 0.25796  | -1.21412 |
| H | 6.83501 | -1.14275 | -2.12705 |
| H | 7.07483 | -1.05233 | -0.36309 |

### 5.3.11 TerNP]<sub>2</sub>·PhCHO·KOtBu (6)

131

[P(μ-NTer)]<sub>2</sub>·PhCHO·KOtBu @ PBE-D3/def2-TZVP - C1

|   |           |           |           |
|---|-----------|-----------|-----------|
| K | -12.92317 | -6.27583  | -12.24264 |
| P | -10.40696 | -7.82836  | -14.27279 |
| P | -11.89226 | -9.73097  | -12.43083 |
| O | -10.71508 | -6.26194  | -13.65813 |
| N | -11.89730 | -8.61611  | -13.92568 |
| N | -12.19676 | -8.67504  | -11.18840 |
| C | -14.62570 | -7.60237  | -14.43425 |
| C | -14.43354 | -6.30938  | -14.97628 |
| C | -15.08630 | -5.21668  | -14.39246 |
| C | -15.95115 | -5.37181  | -13.29966 |
| C | -16.13285 | -6.66072  | -12.78732 |
| C | -15.48378 | -7.78105  | -13.33003 |
| C | -13.03026 | -6.68694  | -9.27364  |
| C | -11.86746 | -5.88930  | -9.40168  |
| C | -11.99485 | -4.52471  | -9.69073  |
| C | -13.24741 | -3.91059  | -9.84141  |
| C | -14.38634 | -4.70717  | -9.68106  |
| C | -14.30007 | -6.07861  | -9.39420  |
| C | -9.58268  | -8.55560  | -12.71206 |
| O | -10.19424 | -9.82530  | -12.51041 |
| C | -9.93909  | -5.10125  | -14.09132 |
| C | -12.66976 | -9.15135  | -15.02156 |
| C | -12.46279 | -9.10322  | -9.89813  |
| C | -14.02333 | -8.75939  | -15.15908 |
| C | -13.55111 | -6.11146  | -16.17797 |
| H | -14.93226 | -4.22085  | -14.81821 |
| C | -16.67885 | -4.18946  | -12.71782 |
| H | -16.79922 | -6.80637  | -11.93426 |
| C | -15.68117 | -9.13901  | -12.71572 |
| C | -12.91886 | -8.13361  | -8.93811  |
| C | -10.50912 | -6.50793  | -9.23192  |
| H | -11.08791 | -3.92057  | -9.79030  |
| C | -13.35950 | -2.43720  | -10.13268 |
| H | -15.37476 | -4.25185  | -9.78805  |
| C | -15.55826 | -6.88835  | -9.22596  |
| H | -9.85134  | -7.86451  | -11.89239 |
| C | -8.09117  | -8.68566  | -12.79385 |
| C | -9.73857  | -5.08195  | -15.60806 |
| C | -8.59502  | -5.11116  | -13.36358 |
| C | -10.78079 | -3.90084  | -13.65294 |
| C | -12.14790 | -10.10016 | -15.94096 |
| C | -12.28898 | -10.43803 | -9.39325  |
| C | -14.85122 | -9.37704  | -16.10685 |
| H | -12.53636 | -6.49354  | -15.99335 |
| H | -13.93487 | -6.66838  | -17.04596 |
| H | -13.48285 | -5.04924  | -16.44759 |
| H | -16.00469 | -3.33189  | -12.57531 |
| H | -17.48796 | -3.85650  | -13.38677 |
| H | -17.12984 | -4.43525  | -11.74753 |
| H | -16.49464 | -9.12539  | -11.97897 |
| H | -15.90302 | -9.90073  | -13.47552 |
| H | -14.76074 | -9.46465  | -12.20308 |
| C | -13.25419 | -8.49487  | -7.62954  |

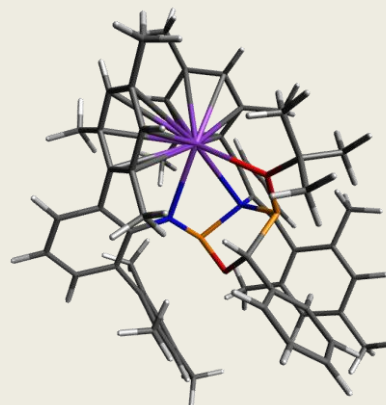

|   |           |           |           |
|---|-----------|-----------|-----------|
| H | -10.38287 | -6.90682  | -8.21428  |
| H | -10.39705 | -7.36066  | -9.91800  |
| H | -9.71071  | -5.77961  | -9.42769  |
| H | -13.24237 | -1.84233  | -9.21280  |
| H | -12.58093 | -2.10252  | -10.83369 |
| H | -14.33984 | -2.18657  | -10.56133 |
| H | -15.72531 | -7.15137  | -8.17092  |
| H | -16.43570 | -6.32812  | -9.57597  |
| H | -15.49534 | -7.84120  | -9.77067  |
| C | -7.28036  | -8.15400  | -11.78300 |
| C | -7.48673  | -9.34576  | -13.87148 |
| H | -9.13499  | -5.93515  | -15.94347 |
| H | -10.70479 | -5.11695  | -16.12913 |
| H | -9.22186  | -4.15601  | -15.89882 |
| H | -8.75209  | -5.15889  | -12.27645 |
| H | -7.99353  | -5.98220  | -13.65879 |
| H | -8.02024  | -4.20250  | -13.59512 |
| H | -10.94666 | -3.92316  | -12.56494 |
| H | -10.26927 | -2.95970  | -13.89798 |
| H | -11.75492 | -3.90338  | -14.16527 |
| C | -13.00560 | -10.68287 | -16.88807 |
| C | -10.71557 | -10.52657 | -16.05137 |
| C | -12.64869 | -10.75658 | -8.07773  |
| C | -11.64939 | -11.56197 | -10.14842 |
| C | -14.35496 | -10.35559 | -16.96070 |
| H | -15.89235 | -9.05522  | -16.17871 |
| H | -13.59071 | -7.71150  | -6.94530  |
| C | -13.14378 | -9.80896  | -7.18440  |
| H | -7.74685  | -7.64425  | -10.93662 |
| C | -5.89056  | -8.27449  | -11.84675 |
| C | -6.09985  | -9.47198  | -13.93525 |
| H | -8.11062  | -9.76451  | -14.66081 |
| H | -12.58241 | -11.41945 | -17.57385 |
| C | -10.25072 | -11.69166 | -15.40689 |
| C | -9.88819  | -9.86916  | -16.99400 |
| H | -12.50305 | -11.78913 | -7.75032  |
| C | -10.24283 | -11.69445 | -10.10062 |
| C | -12.42645 | -12.59012 | -10.72505 |
| H | -15.00502 | -10.83875 | -17.69156 |
| H | -13.40284 | -10.08160 | -6.16099  |
| H | -5.27109  | -7.85690  | -11.05099 |
| C | -5.29680  | -8.93468  | -12.92454 |
| H | -5.64341  | -9.98870  | -14.78145 |
| C | -8.95407  | -12.14744 | -15.67972 |
| C | -11.10321 | -12.47044 | -14.44713 |
| C | -8.60045  | -10.35964 | -17.23197 |
| C | -10.38321 | -8.67590  | -17.76419 |
| C | -9.64229  | -12.82916 | -10.65167 |
| C | -9.40142  | -10.62965 | -9.45493  |
| C | -11.78768 | -13.72017 | -11.24565 |
| C | -13.91794 | -12.45051 | -10.83923 |
| H | -4.21089  | -9.03147  | -12.97641 |
| H | -8.59871  | -13.04395 | -15.16354 |
| C | -8.11214  | -11.50020 | -16.58531 |
| H | -10.82792 | -12.23994 | -13.40885 |
| H | -12.16965 | -12.23964 | -14.55304 |
| H | -10.96120 | -13.55111 | -14.59268 |
| H | -7.96380  | -9.83935  | -17.95285 |
| H | -10.65320 | -7.85691  | -17.07904 |
| H | -9.61159  | -8.30826  | -18.45343 |
| H | -11.28419 | -8.91702  | -18.34808 |
| H | -8.55223  | -12.91449 | -10.62366 |
| C | -10.39635 | -13.85830 | -11.22420 |

|   |           |           |           |
|---|-----------|-----------|-----------|
| H | -9.63699  | -10.53183 | -8.38386  |
| H | -8.33194  | -10.85223 | -9.56390  |
| H | -9.59628  | -9.65043  | -9.91415  |
| H | -12.39672 | -14.51018 | -11.69471 |
| H | -14.37250 | -12.09854 | -9.90316  |
| H | -14.15839 | -11.70289 | -11.61491 |
| H | -14.38558 | -13.40137 | -11.12792 |
| C | -6.73188  | -12.02821 | -16.87455 |
| C | -9.72472  | -15.05593 | -11.84044 |
| H | -6.25635  | -12.42284 | -15.96534 |
| H | -6.76717  | -12.85134 | -17.60627 |
| H | -6.08326  | -11.24580 | -17.29255 |
| H | -8.81779  | -15.33850 | -11.28705 |
| H | -10.39698 | -15.92475 | -11.86912 |
| H | -9.41827  | -14.84291 | -12.87823 |

### 5.3.12 H<sub>2</sub>

|   |                               |         |          |                                                                                     |
|---|-------------------------------|---------|----------|-------------------------------------------------------------------------------------|
| 2 | H2 @ PBE-D3/def2-TZVP - Dinfh |         |          |  |
| H | 0.00000                       | 0.00000 | -0.37573 |                                                                                     |
| H | 0.00000                       | 0.00000 | 0.37573  |                                                                                     |

|   |                                 |         |          |  |
|---|---------------------------------|---------|----------|--|
| 2 | H2 @ B3LYP-D3/def2-TZVP - Dinfh |         |          |  |
| H | 0.00000                         | 0.00000 | -0.37203 |  |
| H | 0.00000                         | 0.00000 | 0.37203  |  |

|   |                                |         |          |  |
|---|--------------------------------|---------|----------|--|
| 2 | H2 @ CCSD(T)/def2-TZVP - Dinfh |         |          |  |
| H | 0.00000                        | 0.00000 | -0.37130 |  |
| H | 0.00000                        | 0.00000 | 0.37130  |  |

### 5.3.13 HC≡CH

|   |                                  |         |          |                                                                                       |
|---|----------------------------------|---------|----------|---------------------------------------------------------------------------------------|
| 4 | HC≡CH @ PBE-D3/def2-TZVP - Dinfh |         |          |  |
| C | 0.00000                          | 0.00000 | -0.60381 |                                                                                       |
| C | 0.00000                          | 0.00000 | 0.60381  |                                                                                       |
| H | 0.00000                          | 0.00000 | 1.67476  |                                                                                       |
| H | 0.00000                          | 0.00000 | -1.67476 |                                                                                       |

|   |                                    |         |          |  |
|---|------------------------------------|---------|----------|--|
| 4 | HC≡CH @ B3LYP-D3/def2-TZVP - Dinfh |         |          |  |
| C | 0.00000                            | 0.00000 | -0.59851 |  |
| C | 0.00000                            | 0.00000 | 0.59851  |  |
| H | 0.00000                            | 0.00000 | 1.66139  |  |
| H | 0.00000                            | 0.00000 | -1.66139 |  |

|   |                                   |         |          |  |
|---|-----------------------------------|---------|----------|--|
| 4 | HC≡CH @ CCSD(T)/def2-TZVP - Dinfh |         |          |  |
| C | 0.00000                           | 0.00000 | -0.60491 |  |
| C | 0.00000                           | 0.00000 | 0.60491  |  |
| H | 0.00000                           | 0.00000 | 1.67120  |  |
| H | 0.00000                           | 0.00000 | -1.67120 |  |



5.3.14 H<sub>2</sub>C=CH<sub>2</sub>

|   |                                  |         |          |  |
|---|----------------------------------|---------|----------|--|
| 6 | H2C=CH2 @ PBE-D3/def2-TZVP - D2h |         |          |  |
| C | 0.00000                          | 0.00000 | -0.66639 |  |
| C | 0.00000                          | 0.00000 | 0.66639  |  |
| H | 0.92885                          | 0.00000 | -1.24028 |  |
| H | -0.92885                         | 0.00000 | -1.24028 |  |
| H | 0.92885                          | 0.00000 | 1.24028  |  |
| H | -0.92885                         | 0.00000 | 1.24028  |  |

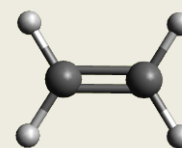

|   |                                    |         |          |  |
|---|------------------------------------|---------|----------|--|
| 6 | H2C=CH2 @ B3LYP-D3/def2-TZVP - D2h |         |          |  |
| C | 0.00000                            | 0.00000 | -0.66246 |  |
| C | 0.00000                            | 0.00000 | 0.66246  |  |
| H | 0.92176                            | 0.00000 | -1.23211 |  |
| H | -0.92176                           | 0.00000 | -1.23211 |  |
| H | 0.92176                            | 0.00000 | 1.23211  |  |
| H | -0.92176                           | 0.00000 | 1.23211  |  |

|   |                                   |          |          |  |
|---|-----------------------------------|----------|----------|--|
| 6 | H2C=CH2 @ CCSD(T)/def2-TZVP - D2h |          |          |  |
| C | 0.00000                           | 0.00000  | -0.66851 |  |
| C | 0.00000                           | 0.00000  | 0.66851  |  |
| H | 0.92533                           | 0.00000  | -1.23633 |  |
| H | -0.92533                          | -0.00000 | -1.23633 |  |
| H | 0.92533                           | 0.00000  | 1.23633  |  |
| H | -0.92533                          | -0.00000 | 1.23633  |  |

5.3.15 H<sub>2</sub>C=O

|   |                                |          |          |  |
|---|--------------------------------|----------|----------|--|
| 4 | H2C=O @ PBE-D3/def2-TZVP - C2v |          |          |  |
| C | 0.00000                        | -0.00000 | 0.58428  |  |
| O | -0.00000                       | 0.00000  | -0.62374 |  |
| H | -0.00000                       | 0.94758  | 1.17925  |  |
| H | -0.00000                       | -0.94758 | 1.17925  |  |

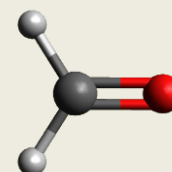

|   |                                  |         |          |  |
|---|----------------------------------|---------|----------|--|
| 4 | H2C=O @ B3LYP-D3/def2-TZVP - C2v |         |          |  |
| C | 0.00000                          | 0.00000 | -0.60531 |  |
| O | 0.00000                          | 0.00000 | 0.60419  |  |
| H | 0.93934                          | 0.00000 | -1.18855 |  |
| H | -0.93934                         | 0.00000 | -1.18855 |  |

|   |                                 |          |          |  |
|---|---------------------------------|----------|----------|--|
| 4 | H2C=O @ CCSD(T)/def2-TZVP - C2v |          |          |  |
| C | 0.00000                         | 0.00000  | 0.59943  |  |
| O | 0.00000                         | 0.00000  | -0.59963 |  |
| H | 0.00000                         | 0.93894  | 1.18735  |  |
| H | 0.00000                         | -0.93894 | 1.18735  |  |

### 5.3.16 [P( $\mu$ -NH)]<sub>2</sub> (1H)

|   |                                                       |          |          |
|---|-------------------------------------------------------|----------|----------|
| 6 | [P( $\mu$ -NH)] <sub>2</sub> @ PBE-D3/def2-TZVP - D2h |          |          |
| N | 1.09564                                               | 0.00000  | 0.00000  |
| N | -1.09564                                              | -0.00000 | 0.00000  |
| P | -0.00000                                              | -1.31771 | 0.00000  |
| P | 0.00000                                               | 1.31771  | 0.00000  |
| H | 2.10869                                               | 0.00000  | -0.00000 |
| H | -2.10869                                              | -0.00000 | -0.00000 |

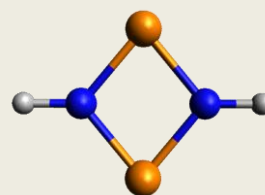

|   |                                                         |          |         |
|---|---------------------------------------------------------|----------|---------|
| 6 | [P( $\mu$ -NH)] <sub>2</sub> @ B3LYP-D3/def2-TZVP - D2h |          |         |
| N | 1.09097                                                 | -0.00000 | 0.00000 |
| N | -1.09097                                                | 0.00000  | 0.00000 |
| P | 0.00000                                                 | 1.30947  | 0.00000 |
| P | -0.00000                                                | -1.30947 | 0.00000 |
| H | 2.09640                                                 | 0.00000  | 0.00000 |
| H | -2.09640                                                | -0.00000 | 0.00000 |

|   |                                          |          |         |
|---|------------------------------------------|----------|---------|
| 6 | H <sub>2</sub> @ CCSD(T)/def2-TZVP - D2h |          |         |
| N | 0.00000                                  | 1.09163  | 0.00000 |
| N | -0.00000                                 | -1.09163 | 0.00000 |
| P | 1.31332                                  | -0.00000 | 0.00000 |
| P | -1.31332                                 | 0.00000  | 0.00000 |
| H | -0.00000                                 | 2.10024  | 0.00000 |
| H | 0.00000                                  | -2.10024 | 0.00000 |

### 5.3.17 [P( $\mu$ -NH)]<sub>2</sub>···H<sub>2</sub> (vdW)

|   |                                                                                           |          |          |
|---|-------------------------------------------------------------------------------------------|----------|----------|
| 8 | [P( $\mu$ -NH)] <sub>2</sub> ···H <sub>2</sub> (vdW) @ PBE-D3/def2-TZVP - C <sub>2v</sub> |          |          |
| N | -0.00000                                                                                  | -1.09681 | 0.08477  |
| N | 0.00000                                                                                   | 1.09681  | 0.08477  |
| P | -1.31191                                                                                  | 0.00000  | 0.04139  |
| P | 1.31191                                                                                   | 0.00000  | 0.04139  |
| H | 0.00000                                                                                   | -2.10860 | 0.03850  |
| H | -0.00000                                                                                  | 2.10860  | 0.03850  |
| H | -0.38248                                                                                  | 0.00000  | -2.48850 |
| H | 0.38248                                                                                   | 0.00000  | -2.48850 |

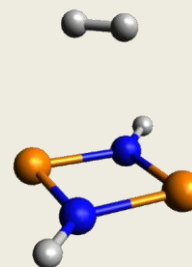

|   |                                                                                             |          |          |
|---|---------------------------------------------------------------------------------------------|----------|----------|
| 8 | [P( $\mu$ -NH)] <sub>2</sub> ···H <sub>2</sub> (vdW) @ B3LYP-D3/def2-TZVP - C <sub>2v</sub> |          |          |
| N | -0.00000                                                                                    | -1.09328 | 0.07959  |
| N | 0.00000                                                                                     | 1.09328  | 0.07959  |
| P | -1.30363                                                                                    | -0.00000 | 0.04408  |
| P | 1.30363                                                                                     | 0.00000  | 0.04408  |
| H | 0.00000                                                                                     | -2.09781 | 0.02854  |
| H | 0.00000                                                                                     | 2.09781  | 0.02854  |
| H | -0.37726                                                                                    | 0.00000  | -2.48893 |
| H | 0.37726                                                                                     | 0.00000  | -2.48893 |

| 8                                                                              |          |          |          |
|--------------------------------------------------------------------------------|----------|----------|----------|
| [P( $\mu$ -NH)] <sub>2</sub> ···H <sub>2</sub> (vdW) @ CCSD(T)/def2-TZVP - C2v |          |          |          |
| N                                                                              | 0.00000  | -1.09208 | 0.06700  |
| N                                                                              | 0.00000  | 1.09208  | 0.06700  |
| P                                                                              | -1.31044 | 0.00000  | 0.05450  |
| P                                                                              | 1.31044  | 0.00000  | 0.05450  |
| H                                                                              | 0.00000  | -2.10042 | 0.06864  |
| H                                                                              | 0.00000  | 2.10042  | 0.06864  |
| H                                                                              | -0.37381 | 0.00000  | -2.67426 |
| H                                                                              | 0.37381  | 0.00000  | -2.67426 |

### 5.3.18 [P( $\mu$ -NH)]<sub>2</sub>···H<sub>2</sub> (TS)

| 8                                                                            |          |          |          |
|------------------------------------------------------------------------------|----------|----------|----------|
| [P( $\mu$ -NH)] <sub>2</sub> ···H <sub>2</sub> (TS) @ PBE-D3/def2-TZVP - C2v |          |          |          |
| N                                                                            | -0.00000 | -1.11197 | 0.27664  |
| N                                                                            | 0.00000  | 1.11197  | 0.27664  |
| P                                                                            | -1.27252 | 0.00000  | -0.06995 |
| P                                                                            | 1.27252  | 0.00000  | -0.06995 |
| H                                                                            | -0.00000 | -2.09357 | 0.01459  |
| H                                                                            | 0.00000  | 2.09357  | 0.01459  |
| H                                                                            | -0.49551 | 0.00000  | -1.70943 |
| H                                                                            | 0.49551  | 0.00000  | -1.70943 |

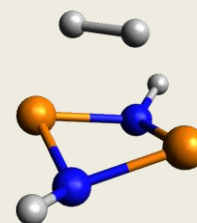

| 8                                                                              |          |          |          |
|--------------------------------------------------------------------------------|----------|----------|----------|
| [P( $\mu$ -NH)] <sub>2</sub> ···H <sub>2</sub> (TS) @ B3LYP-D3/def2-TZVP - C2v |          |          |          |
| N                                                                              | 0.00000  | -1.10566 | 0.27008  |
| N                                                                              | 0.00000  | 1.10566  | 0.27008  |
| P                                                                              | -1.26638 | 0.00000  | -0.06776 |
| P                                                                              | 1.26638  | 0.00000  | -0.06776 |
| H                                                                              | 0.00000  | -2.08575 | 0.03609  |
| H                                                                              | 0.00000  | 2.08575  | 0.03609  |
| H                                                                              | -0.49843 | 0.00000  | -1.70697 |
| H                                                                              | 0.49843  | 0.00000  | -1.70697 |

| 8                                                                             |          |          |          |
|-------------------------------------------------------------------------------|----------|----------|----------|
| [P( $\mu$ -NH)] <sub>2</sub> ···H <sub>2</sub> (TS) @ CCSD(T)/def2-TZVP - C2v |          |          |          |
| N                                                                             | -0.00000 | -1.10412 | 0.27414  |
| N                                                                             | 0.00000  | 1.10412  | 0.27414  |
| P                                                                             | -1.26876 | 0.00000  | -0.06976 |
| P                                                                             | 1.26876  | 0.00000  | -0.06976 |
| H                                                                             | 0.00000  | -2.08592 | 0.03152  |
| H                                                                             | 0.00000  | 2.08592  | 0.03152  |
| H                                                                             | -0.48710 | 0.00000  | -1.69724 |
| H                                                                             | 0.48710  | 0.00000  | -1.69724 |

### 5.3.19 [P( $\mu$ -NH)]<sub>2</sub> · H<sub>2</sub> (addition product)

| 8                                                                     |          |          |          |
|-----------------------------------------------------------------------|----------|----------|----------|
| [P( $\mu$ -NH)] <sub>2</sub> ·H <sub>2</sub> @ PBE-D3/def2-TZVP - C2v |          |          |          |
| N                                                                     | 0.00000  | -1.12692 | 0.29094  |
| N                                                                     | 0.00000  | 1.12692  | 0.29094  |
| P                                                                     | -1.28626 | 0.00000  | -0.07925 |
| P                                                                     | 1.28626  | 0.00000  | -0.07925 |
| H                                                                     | -0.00000 | -2.08140 | -0.06161 |
| H                                                                     | 0.00000  | 2.08140  | -0.06161 |
| H                                                                     | -1.12612 | 0.00000  | -1.54602 |
| H                                                                     | 1.12612  | 0.00000  | -1.54602 |

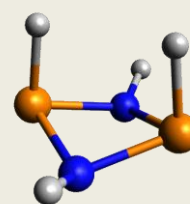

```

8
[P(μ-NH)]2·H2 @ B3LYP-D3/def2-TZVP - C2v
N      0.00000      -1.11864      0.25278
N      -0.00000      1.11864      0.25278
P      -1.29030      0.00000     -0.06346
P       1.29030      0.00000     -0.06346
H       0.00000     -2.08165     -0.04409
H       0.00000      2.08165     -0.04409
H      -1.22171      0.00000     -1.51864
H       1.22171      0.00000     -1.51864

```

```

8
[P(μ-NH)]2·H2 @ CCSD(T)/def2-TZVP - C2v
N      -0.00000     -1.11895      0.27318
N       0.00000      1.11895      0.27318
P      -1.28727      0.00000     -0.07246
P       1.28727      0.00000     -0.07246
H       0.00000     -2.07783     -0.04978
H       0.00000      2.07783     -0.04978
H      -1.18521      0.00000     -1.51982
H       1.18521      0.00000     -1.51982

```

### 5.3.20 [P(μ-NH)]<sub>2</sub>···HC≡CH (vdW)

```

10
[P(μ-NH)]2···HC≡CH (vdW) @ PBE-D3/def2-TZVP - Cs
N      -1.09166      0.74147      0.00000
N       1.10559      0.70602      0.00000
P       0.00442      0.66539     -1.30809
P       0.00442      0.66539      1.30809
H      -2.10338      0.78113      0.00000
H       2.10036      0.51420      0.00000
C      -0.01772     -2.40667     -0.60698
C      -0.01772     -2.40667      0.60698
H      -0.01983     -2.47384     -1.67444
H      -0.01983     -2.47384      1.67444

```

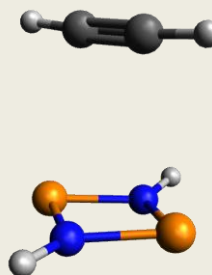

```

10
[P(μ-NH)]2···HC≡CH (vdW) @ B3LYP-D3/def2-TZVP - Cs
N      -1.08478      0.76815      0.00000
N       1.09899      0.71025      0.00000
P       0.00588      0.70660     -1.30280
P       0.00588      0.70660      1.30280
H      -2.08888      0.81065      0.00000
H       2.09493      0.57454      0.00000
C      -0.02177     -2.52858     -0.60000
C      -0.02177     -2.52858      0.60000
H      -0.02308     -2.54724     -1.66135
H      -0.02308     -2.54724      1.66135

```

```

10
[P(μ-NH)]2...HC≡CH (vdw) @ CCSD(T)/def2-TZVP - Cs
N      -1.08433      0.78329      0.00000
N      1.10021      0.72923      0.00000
P      0.00728      0.73618     -1.30881
P      0.00728      0.73618      1.30881
H     -2.09128      0.83747      0.00000
H      2.10262      0.61818      0.00000
C     -0.02620     -2.62048     -0.60581
C     -0.02620     -2.62048      0.60581
H     -0.02760     -2.63332     -1.67167
H     -0.02760     -2.63332      1.67167

```

### 5.3.21 [P(μ-NH)]<sub>2</sub>...HC≡CH (TS)

```

10
[P(μ-NH)]2...HC≡CH (TS) @ PBE-D3/def2-TZVP - C2v
N      0.00000     -1.10046      0.71447
N      0.00000      1.10046      0.71447
P     -1.30234      0.00000      0.60780
P      1.30234      0.00000      0.60780
H      0.00000     -2.10539      0.59002
H      0.00000      2.10539      0.59002
C     -0.61017      0.00000     -2.24644
C      0.61017      0.00000     -2.24644
H     -1.66457      0.00000     -2.42701
H      1.66457      0.00000     -2.42701

```

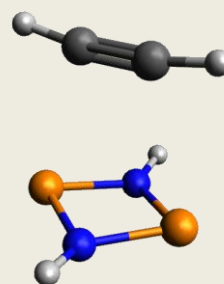

```

10
[P(μ-NH)]2...HC≡CH (TS) @ B3LYP-D3/def2-TZVP - C2v
N      0.00000     -1.09714      0.71387
N      0.00000      1.09714      0.71387
P     -1.28806      0.00000      0.55802
P      1.28806      0.00000      0.55802
H      0.00000     -2.09002      0.55737
H      0.00000      2.09002      0.55737
C     -0.60925      0.00000     -2.11459
C      0.60925      0.00000     -2.11459
H     -1.62531      0.00000     -2.42727
H      1.62531      0.00000     -2.42727

```

```

10
[P(μ-NH)]2...HC≡CH (TS) @ CCSD(T)/def2-TZVP - C2v
N     -1.09788      0.71263      0.00000
N      1.09791      0.71245      0.00000
P      0.00002      0.54180     -1.29060
P      0.00002      0.54180      1.29060
H     -2.09319      0.54807      0.00000
H      2.09330      0.54843      0.00000
C     -0.00006     -2.07137     -0.61654
C     -0.00006     -2.07137      0.61654
H     -0.00004     -2.41640     -1.62713
H     -0.00004     -2.41640      1.62713

```

### 5.3.22 [P( $\mu$ -NH)]<sub>2</sub> · HC≡CH (addition product)

10  
[P( $\mu$ -NH)]<sub>2</sub>·HC≡CH @ PBE-D3/def2-TZVP - C2v

|   |          |          |          |
|---|----------|----------|----------|
| N | -0.00000 | -1.12705 | 0.82012  |
| N | 0.00000  | 1.12705  | 0.82012  |
| P | -1.25437 | -0.00000 | 0.28986  |
| P | 1.25437  | 0.00000  | 0.28986  |
| H | 0.00000  | -2.05894 | 0.40082  |
| H | -0.00000 | 2.05894  | 0.40082  |
| C | -0.66725 | -0.00000 | -1.53612 |
| C | 0.66725  | 0.00000  | -1.53612 |
| H | -1.33540 | -0.00000 | -2.40002 |
| H | 1.33540  | 0.00000  | -2.40002 |

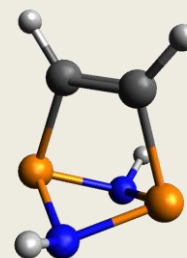

10  
[P( $\mu$ -NH)]<sub>2</sub>·HC≡CH @ B3LYP-D3/def2-TZVP - C2v

|   |          |          |          |
|---|----------|----------|----------|
| N | -0.00000 | -1.12048 | 0.80670  |
| N | 0.00000  | 1.12048  | 0.80670  |
| P | -1.25131 | 0.00000  | 0.29203  |
| P | 1.25131  | 0.00000  | 0.29203  |
| H | 0.00000  | -2.05453 | 0.41557  |
| H | 0.00000  | 2.05453  | 0.41557  |
| C | -0.66349 | -0.00000 | -1.52818 |
| C | 0.66349  | 0.00000  | -1.52818 |
| H | -1.32069 | 0.00000  | -2.38948 |
| H | 1.32069  | 0.00000  | -2.38948 |

10  
[P( $\mu$ -NH)]<sub>2</sub>·HC≡CH @ CCSD(T)/def2-TZVP - C2v

|   |          |          |          |
|---|----------|----------|----------|
| N | 0.00000  | -1.11993 | 0.81012  |
| N | 0.00000  | 1.11993  | 0.81012  |
| P | -1.25139 | 0.00000  | 0.28890  |
| P | 1.25139  | 0.00000  | 0.28890  |
| H | -0.00000 | -2.05214 | 0.40337  |
| H | 0.00000  | 2.05214  | 0.40337  |
| C | -0.67074 | 0.00000  | -1.52305 |
| C | 0.67074  | 0.00000  | -1.52305 |
| H | -1.32618 | 0.00000  | -2.38981 |
| H | 1.32618  | 0.00000  | -2.38981 |

### 5.3.23 [P( $\mu$ -NH)]<sub>2</sub>···H<sub>2</sub>C=CH<sub>2</sub> (vdW)

12  
[P( $\mu$ -NH)]<sub>2</sub>···H<sub>2</sub>C=CH<sub>2</sub> (vdW) @ B3LYP-D3/def2-TZVP - C2v

|   |          |          |          |
|---|----------|----------|----------|
| N | 1.09259  | -0.00000 | 0.75830  |
| N | -1.09259 | 0.00000  | 0.75830  |
| P | 0.00000  | -1.30099 | 0.69616  |
| P | 0.00000  | 1.30099  | 0.69616  |
| H | 2.09603  | 0.00000  | 0.70489  |
| H | -2.09603 | -0.00000 | 0.70489  |
| C | 0.00000  | -0.66730 | -2.34094 |
| C | 0.00000  | 0.66730  | -2.34094 |
| H | 0.91847  | -1.23870 | -2.37001 |
| H | -0.91847 | -1.23870 | -2.37001 |
| H | 0.91847  | 1.23870  | -2.37001 |
| H | -0.91847 | 1.23870  | -2.37001 |

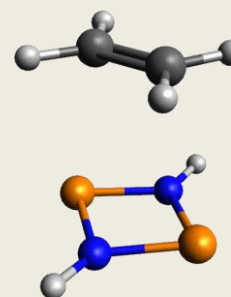

| 12                                                                                               |          |          |          |
|--------------------------------------------------------------------------------------------------|----------|----------|----------|
| [P( $\mu$ -NH)] <sub>2</sub> ...H <sub>2</sub> C=CH <sub>2</sub> (vdW) @ CCSD(T)/def2-TZVP - C2v |          |          |          |
| N                                                                                                | 1.09237  | 0.00000  | 0.77481  |
| N                                                                                                | -1.09237 | 0.00000  | 0.77481  |
| P                                                                                                | 0.00000  | -1.30846 | 0.74290  |
| P                                                                                                | 0.00000  | 1.30846  | 0.74290  |
| H                                                                                                | 2.10059  | 0.00000  | 0.75468  |
| H                                                                                                | -2.10059 | 0.00000  | 0.75468  |
| C                                                                                                | 0.00000  | -0.67028 | -2.46621 |
| C                                                                                                | 0.00000  | 0.67028  | -2.46621 |
| H                                                                                                | 0.92348  | -1.24056 | -2.48142 |
| H                                                                                                | -0.92348 | -1.24056 | -2.48142 |
| H                                                                                                | 0.92348  | 1.24056  | -2.48142 |
| H                                                                                                | -0.92348 | 1.24056  | -2.48142 |

### 5.3.24 [P( $\mu$ -NH)]<sub>2</sub>...H<sub>2</sub>C=CH<sub>2</sub> (TS)

| 12                                                                                               |          |          |          |
|--------------------------------------------------------------------------------------------------|----------|----------|----------|
| [P( $\mu$ -NH)] <sub>2</sub> ...H <sub>2</sub> C=CH <sub>2</sub> (TS) @ B3LYP-D3/def2-TZVP - C2v |          |          |          |
| N                                                                                                | 1.09630  | 0.00000  | 0.74730  |
| N                                                                                                | -1.09630 | 0.00000  | 0.74730  |
| P                                                                                                | 0.00000  | -1.29041 | 0.59075  |
| P                                                                                                | 0.00000  | 1.29041  | 0.59075  |
| H                                                                                                | 2.09347  | 0.00000  | 0.62207  |
| H                                                                                                | -2.09347 | 0.00000  | 0.62207  |
| C                                                                                                | 0.00000  | -0.67852 | -2.07874 |
| C                                                                                                | 0.00000  | 0.67852  | -2.07874 |
| H                                                                                                | 0.91584  | -1.24168 | -2.19473 |
| H                                                                                                | -0.91584 | -1.24168 | -2.19473 |
| H                                                                                                | 0.91584  | 1.24168  | -2.19473 |
| H                                                                                                | -0.91584 | 1.24168  | -2.19473 |

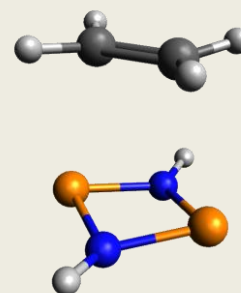

| 12                                                                                              |          |          |          |
|-------------------------------------------------------------------------------------------------|----------|----------|----------|
| [P( $\mu$ -NH)] <sub>2</sub> ...H <sub>2</sub> C=CH <sub>2</sub> (TS) @ CCSD(T)/def2-TZVP - C2v |          |          |          |
| N                                                                                               | 1.09655  | 0.00000  | 0.74323  |
| N                                                                                               | -1.09655 | 0.00000  | 0.74323  |
| P                                                                                               | 0.00000  | -1.29399 | 0.58034  |
| P                                                                                               | 0.00000  | 1.29399  | 0.58034  |
| H                                                                                               | 2.09766  | 0.00000  | 0.62026  |
| H                                                                                               | -2.09766 | -0.00000 | 0.62026  |
| C                                                                                               | 0.00000  | -0.68342 | -2.04995 |
| C                                                                                               | 0.00000  | 0.68342  | -2.04995 |
| H                                                                                               | 0.92031  | -1.24390 | -2.17714 |
| H                                                                                               | -0.92031 | -1.24390 | -2.17714 |
| H                                                                                               | 0.92031  | 1.24390  | -2.17714 |
| H                                                                                               | -0.92031 | 1.24390  | -2.17714 |

### 5.3.25 [P( $\mu$ -NH)]<sub>2</sub> · H<sub>2</sub>C=CH<sub>2</sub> (addition product)

12  
[P( $\mu$ -NH)]<sub>2</sub>·H<sub>2</sub>C=CH<sub>2</sub> @ PBE-D3/def2-TZVP - C2v

|   |          |          |          |
|---|----------|----------|----------|
| N | -0.00000 | -1.12267 | 0.82553  |
| N | 0.00000  | 1.12267  | 0.82553  |
| P | -1.26125 | 0.00000  | 0.32774  |
| P | 1.26125  | 0.00000  | 0.32774  |
| H | 0.00000  | -2.07677 | 0.46271  |
| H | 0.00000  | 2.07677  | 0.46271  |
| C | -0.76640 | 0.00000  | -1.51178 |
| C | 0.76640  | 0.00000  | -1.51178 |
| H | -1.20306 | -0.88598 | -1.99560 |
| H | -1.20306 | 0.88598  | -1.99560 |
| H | 1.20306  | 0.88598  | -1.99560 |
| H | 1.20306  | -0.88598 | -1.99560 |

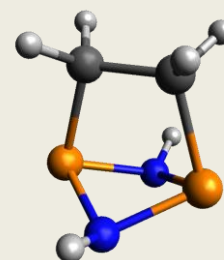

12  
[P( $\mu$ -NH)]<sub>2</sub>·H<sub>2</sub>C=CH<sub>2</sub> @ B3LYP-D3/def2-TZVP - C2v

|   |          |          |          |
|---|----------|----------|----------|
| N | -0.00000 | -1.11733 | 0.81039  |
| N | 0.00000  | 1.11733  | 0.81039  |
| P | -1.25734 | 0.00000  | 0.33050  |
| P | 1.25734  | 0.00000  | 0.33050  |
| H | 0.00000  | -2.07337 | 0.48023  |
| H | 0.00000  | 2.07337  | 0.48023  |
| C | -0.76775 | 0.00000  | -1.50399 |
| C | 0.76775  | 0.00000  | -1.50399 |
| H | -1.19596 | -0.87979 | -1.98788 |
| H | -1.19596 | 0.87979  | -1.98788 |
| H | 1.19596  | 0.87979  | -1.98788 |
| H | 1.19596  | -0.87979 | -1.98788 |

12  
[P( $\mu$ -NH)]<sub>2</sub>·H<sub>2</sub>C=CH<sub>2</sub> @ CCSD(T)/def2-TZVP - C2v

|   |          |          |          |
|---|----------|----------|----------|
| N | 0.00000  | -1.11605 | 0.81369  |
| N | 0.00000  | 1.11605  | 0.81369  |
| P | -1.25787 | 0.00000  | 0.32763  |
| P | 1.25787  | 0.00000  | 0.32763  |
| H | -0.00000 | -2.07183 | 0.46941  |
| H | 0.00000  | 2.07183  | 0.46941  |
| C | -0.77069 | 0.00000  | -1.49971 |
| C | 0.77069  | 0.00000  | -1.49971 |
| H | -1.19772 | -0.88377 | -1.98687 |
| H | -1.19772 | 0.88377  | -1.98687 |
| H | 1.19772  | 0.88377  | -1.98687 |
| H | 1.19772  | -0.88377 | -1.98687 |



### 5.3.26 [P( $\mu$ -NH)]<sub>2</sub>···H<sub>2</sub>C=O (vdW)

| 10                                                                                |          |          |          |
|-----------------------------------------------------------------------------------|----------|----------|----------|
| [P( $\mu$ -NH)] <sub>2</sub> ···H <sub>2</sub> C=O (vdW) @ CCSD(T)/def2-TZVP - Cs |          |          |          |
| N                                                                                 | 0.73404  | -0.06546 | -1.09282 |
| P                                                                                 | 0.53539  | -1.37200 | -0.00015 |
| P                                                                                 | 0.82843  | 1.22459  | 0.00005  |
| H                                                                                 | 0.68715  | -0.05076 | -2.10026 |
| N                                                                                 | 0.73308  | -0.06552 | 1.09274  |
| C                                                                                 | -2.22316 | -0.38825 | 0.00023  |
| O                                                                                 | -2.04687 | 0.81906  | 0.00006  |
| H                                                                                 | 0.68643  | -0.05095 | 2.10019  |
| H                                                                                 | -2.34520 | -0.96137 | -0.93544 |
| H                                                                                 | -2.34465 | -0.96118 | 0.93609  |

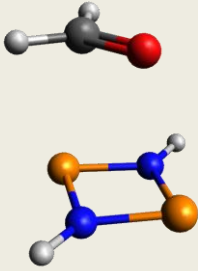

### 5.3.27 [P( $\mu$ -NH)]<sub>2</sub>···H<sub>2</sub>C=O (TS)

| 10                                                                               |          |          |          |
|----------------------------------------------------------------------------------|----------|----------|----------|
| [P( $\mu$ -NH)] <sub>2</sub> ···H <sub>2</sub> C=O (TS) @ CCSD(T)/def2-TZVP - Cs |          |          |          |
| N                                                                                | 0.69983  | 0.18379  | -1.09569 |
| P                                                                                | 0.87888  | -1.12875 | -0.00002 |
| P                                                                                | 0.27954  | 1.39400  | -0.00001 |
| H                                                                                | 0.58643  | 0.17072  | -2.09812 |
| N                                                                                | 0.70000  | 0.18382  | 1.09566  |
| C                                                                                | -1.76391 | -1.06578 | 0.00004  |
| O                                                                                | -1.99589 | 0.15134  | 0.00007  |
| H                                                                                | 0.58616  | 0.17066  | 2.09804  |
| H                                                                                | -1.76175 | -1.65143 | -0.93340 |
| H                                                                                | -1.76178 | -1.65147 | 0.93346  |

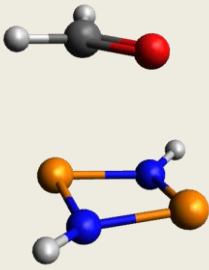

### 5.3.28 [P( $\mu$ -NH)]<sub>2</sub> · H<sub>2</sub>C=O (addition product)

| 10                                                                       |          |          |          |
|--------------------------------------------------------------------------|----------|----------|----------|
| [P( $\mu$ -NH)] <sub>2</sub> ·H <sub>2</sub> C=O @ PBE-D3/def2-TZVP - Cs |          |          |          |
| N                                                                        | 0.81994  | 0.22254  | -1.11881 |
| P                                                                        | 0.67586  | -1.13572 | 0.00000  |
| P                                                                        | -0.07335 | 1.23605  | 0.00000  |
| H                                                                        | 0.47207  | 0.12726  | -2.07506 |
| N                                                                        | 0.81994  | 0.22254  | 1.11881  |
| C                                                                        | -1.22939 | -1.04074 | 0.00000  |
| O                                                                        | -1.53042 | 0.37235  | 0.00000  |
| H                                                                        | 0.47207  | 0.12726  | 2.07506  |
| H                                                                        | -1.65306 | -1.51565 | -0.89874 |
| H                                                                        | -1.65306 | -1.51565 | 0.89874  |

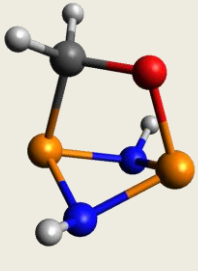

| 10                                                                         |          |          |          |
|----------------------------------------------------------------------------|----------|----------|----------|
| [P( $\mu$ -NH)] <sub>2</sub> ·H <sub>2</sub> C=O @ B3LYP-D3/def2-TZVP - Cs |          |          |          |
| N                                                                          | 0.80344  | 0.21919  | -1.11287 |
| P                                                                          | 0.67929  | -1.13022 | -0.00000 |
| P                                                                          | -0.07539 | 1.23397  | -0.00000 |
| H                                                                          | 0.48384  | 0.13051  | -2.06970 |
| N                                                                          | 0.80344  | 0.21919  | 1.11287  |
| C                                                                          | -1.22203 | -1.04190 | -0.00000 |
| O                                                                          | -1.51193 | 0.37089  | -0.00000 |
| H                                                                          | 0.48384  | 0.13051  | 2.06970  |
| H                                                                          | -1.64738 | -1.50630 | -0.89192 |
| H                                                                          | -1.64738 | -1.50630 | 0.89192  |

10

[P( $\mu$ -NH)]<sub>2</sub>·H<sub>2</sub>C=O @ CCSD(T)/def2-TZVP - Cs

|   |          |          |          |
|---|----------|----------|----------|
| N | 0.80701  | 0.22059  | -1.11285 |
| P | 0.67754  | -1.13033 | -0.00000 |
| P | -0.07834 | 1.23039  | -0.00000 |
| H | 0.46987  | 0.12630  | -2.06765 |
| N | 0.80701  | 0.22059  | 1.11285  |
| C | -1.21642 | -1.04109 | -0.00000 |
| O | -1.51160 | 0.37519  | -0.00000 |
| H | 0.46987  | 0.12630  | 2.06765  |
| H | -1.64669 | -1.50391 | -0.89477 |
| H | -1.64669 | -1.50391 | 0.89477  |

## 6 References

- 1 J. Bresien, T. Kröger-Badge, S. Lochbrunner, D. Michalik, H. Müller, A. Schulz and E. Zander, *Chem. Sci.*, 2019, **10**, 3486–3493.
- 2 G. R. Fulmer, A. J. M. Miller, N. H. Sherden, H. E. Gottlieb, A. Nudelman, B. M. Stoltz, J. E. Bercaw and K. I. Goldberg, *Organometallics*, 2010, **29**, 2176–2179.
- 3 G. M. Sheldrick, *Acta Crystallogr. Sect. A Found. Adv.*, 2015, **71**, 3–8.
- 4 G. M. Sheldrick, *Acta Crystallogr. Sect. C Struct. Chem.*, 2015, **71**, 3–8.
- 5 G. M. Sheldrick, *SADABS Version 2*, University of Göttingen, Germany, 2004.
- 6 M. J. Frisch, G. W. Trucks, H. B. Schlegel, G. E. Scuseria, M. A. Robb, J. R. Cheeseman, G. Scalmani, V. Barone, B. Mennucci, G. A. Peterson, H. Nakatsuji, M. Caricato, X. Li, H. P. Hratchian, A. F. Izmaylov, J. Bloino, G. Zheng, J. L. Sonnenberg, M. Hada, M. Ehara, K. Toyota, R. Fukuda, J. Hasegawa, M. Ishida, T. Nakajima, Y. Honda, O. Kitao, H. Nakai, T. Vreven, J. A. Montgomery Jr., J. E. Peralta, F. Ogliaro, M. Bearpark, J. J. Heyd, E. Brothers, K. N. Kudin, V. N. Staroverov, T. Keith, R. Kobayashi, J. Normand, K. Raghavachari, A. Rendell, J. C. Burant, S. S. Iyengar, J. Tomasi, M. Cossi, N. Rega, J. M. Millam, M. Klene, J. E. Know, J. B. Cross, V. Bakken, C. Adamo, J. Jaramillo, R. Gomperts, R. E. Stratmann, O. Yazyev, A. J. Austin, R. Cammi, C. Pomelli, J. W. Ochterski, R. L. Martin, K. Morokuma, V. G. Zakrzewski, G. A. Voth, P. Salvador, J. J. Dannenberg, S. Dapprich, A. D. Daniels, O. Farkas, J. B. Foresman, J. V. Ortiz, J. Cioslowski and D. J. Fox, *Gaussian 09, Revision E.01*, Gaussian Inc., Wallingford CT, 2013.
- 7 F. Neese, *Wiley Interdiscip. Rev. Comput. Mol. Sci.*, 2012, **2**, 73–78.
- 8 F. Neese, F. Wennmohs, U. Becker and C. Riplinger, *J. Chem. Phys.*, 2020, **152**, 224108.
- 9 F. Neese, *Wiley Interdiscip. Rev. Comput. Mol. Sci.*, 2022, e1606.
- 10 F. Weinhold and J. E. Carpenter, in *The Structure of Small Molecules and Ions*, eds. R. Naaman and Z. Vager, Springer, Boston, MA, 1988, pp. 227–236.
- 11 F. Weinhold and C. R. Landis, *Valency and Bonding. A Natural Bond Orbital Donor-Acceptor Perspective*, Cambridge University Press, 2005.
- 12 E. D. Glendening, J. K. Badenhop, A. E. Reed, J. E. Carpenter, J. A. Bohmann, C. M. Morales, C. R. Landis and F. Weinhold, *NBO 6.0*, Theoretical Chemistry Institute, University of Wisconsin, Madison, 2013.
- 13 F. Weinhold, C. R. Landis and E. D. Glendening, *Int. Rev. Phys. Chem.*, 2016, **35**, 399–440.
- 14 J. P. Perdew, K. Burke and M. Ernzerhof, *Phys. Rev. Lett.*, 1996, **77**, 3865–3868.

- 15 J. P. Perdew, K. Burke and M. Ernzerhof, *Phys. Rev. Lett.*, 1997, **78**, 1396–1396.
- 16 S. H. Vosko, L. Wilk and M. Nusair, *Can. J. Phys.*, 1980, **58**, 1200–1211.
- 17 C. Lee, W. Yang and R. G. Parr, *Phys. Rev. B*, 1988, **37**, 785–789.
- 18 A. D. Becke, *Phys. Rev. A*, 1988, **38**, 3098–3100.
- 19 B. Miehlisch, A. Savin, H. Stoll and H. Preuss, *Chem. Phys. Lett.*, 1989, **157**, 200–206.
- 20 A. D. Becke, *J. Chem. Phys.*, 1993, **98**, 5648–5652.
- 21 P. J. Stephens, F. J. Devlin, C. F. Chabalowski and M. J. Frisch, *J. Phys. Chem.*, 1994, **98**, 11623–11627.
- 22 S. Grimme, J. Antony, S. Ehrlich and H. Krieg, *J. Chem. Phys.*, 2010, **132**, 154104.
- 23 S. Grimme, S. Ehrlich and L. Goerigk, *J. Comput. Chem.*, 2011, **32**, 1456–1465.
- 24 F. Weigend and R. Ahlrichs, *Phys. Chem. Chem. Phys.*, 2005, **7**, 3297–305.
- 25 F. Weigend, *Phys. Chem. Chem. Phys.*, 2006, **8**, 1057.
- 26 F. Neese, F. Wennmohs, A. Hansen and U. Becker, *Chem. Phys.*, 2009, **356**, 98–109.
- 27 C. Riplinger and F. Neese, *J. Chem. Phys.*, 2013, **138**, 034106.
- 28 D. G. Liakos, M. Sparta, M. K. Kesharwani, J. M. L. Martin and F. Neese, *J. Chem. Theory Comput.*, 2015, **11**, 1525–1539.
- 29 C. Riplinger, P. Pinski, U. Becker, E. F. Valeev and F. Neese, *J. Chem. Phys.*, 2016, **144**, 024109.
- 30 D. G. Liakos, Y. Guo and F. Neese, *J. Phys. Chem. A*, 2020, **124**, 90–100.
- 31 A. Hellweg, C. Hättig, S. Höfener and W. Klopper, *Theor. Chem. Acc.*, 2007, **117**, 587–597.
- 32 T. J. Lee and P. R. Taylor, *Int. J. Quantum Chem.*, 1989, **36**, 199–207.
- 33 C. J. Cramer, *Essentials of Computational Chemistry: Theories and Models*, John Wiley & Sons, Ltd, Chichester, UK, 2004.
- 34 J. Čížek, in *Advances in Chemical Physics*, eds. R. LeFebvre and C. Moser, John Wiley & Sons, 1969, vol. 14, pp. 35–89.
- 35 R. J. Bartlett and G. D. Purvis, *Int. J. Quantum Chem.*, 1978, **14**, 561–581.
- 36 G. D. Purvis and R. J. Bartlett, *J. Chem. Phys.*, 1982, **76**, 1910–1918.
- 37 J. A. Pople, M. Head-Gordon and K. Raghavachari, *J. Chem. Phys.*, 1987, **87**, 5968–5975.
- 38 G. E. Scuseria, C. L. Janssen and H. F. Schaefer, *J. Chem. Phys.*, 1988, **89**, 7382–7387.
- 39 G. E. Scuseria and H. F. Schaefer, *J. Chem. Phys.*, 1989, **90**, 3700–3703.
- 40 G. Mills, H. Jónsson and G. K. Schenter, *Surf. Sci.*, 1995, **324**, 305–337.

- 41 H. Jónsson, G. Mills and K. W. Jacobsen, in *Classical and Quantum Dynamics in Condensed Phase Simulations*, World Scientific, 1998, pp. 385–404.
- 42 G. Henkelman and H. Jónsson, *J. Chem. Phys.*, 2000, **113**, 9978–9985.
- 43 G. Henkelman, B. P. Uberuaga and H. Jónsson, *J. Chem. Phys.*, 2000, **113**, 9901–9904.
- 44 E. Maras, O. Trushin, A. Stukowski, T. Ala-Nissila and H. Jónsson, *Comput. Phys. Commun.*, 2016, **205**, 13–21.
- 45 V. Ásgeirsson, B. O. Birgisson, R. Bjornsson, U. Becker, F. Neese, C. Riplinger and H. Jónsson, *J. Chem. Theory Comput.*, 2021, **17**, 4929–4945.
- 46 J. Baker, *J. Comput. Chem.*, 1986, **7**, 385–395.
- 47 H. B. Schlegel, in *Advances in Chemical Physics: Ab Initio Methods in Quantum Chemistry Part I, Volume 67*, ed. K. P. Lawley, John Wiley & Sons, 1987, pp. 249–286.
- 48 H. B. Schlegel, in *Modern Electronic Structure Theory*, ed. D. R. Yarkony, World Scientific, 1995, pp. 459–500.
- 49 F. Eckert, P. Pulay and H.-J. Werner, *J. Comput. Chem.*, 1997, **18**, 1473–1483.
